# Supplementary material for: Rational design of arsine catalysts for arsa-Wittig reaction
Source: Royal Society of Chemistry journal article supplement (doi:10.1039/d2qo01480g), 2022-01-01
Supplement: d2qo01480g1.pdf [file d2qo01480g1.pdf]

## Supporting Information

# Rational design of arsine catalysts for arsa-Wittig reaction

Junya Yukiyasu,<sup>[a]</sup> Ryoto Inaba,<sup>[a]</sup> Takashi Yumura,<sup>[b]</sup> Hiroaki Imoto,<sup>\*[a]</sup> and Kensuke Naka<sup>\*[a,c]</sup>

[a] Faculty of Molecular Chemistry and Engineering, Graduate School of Science and Technology, Kyoto Institute of Technology, Goshokaido-cho, Matsugasaki, Sakyo-ku, Kyoto 606-8585, Japan.

[b] Faculty of Material Science and Technology, Graduate School of Science and Technology, Kyoto Institute of Technology, Goshokaido-cho, Matsugasaki, Sakyo-ku, Kyoto 606-8585, Japan.

[c] Materials Innovation Lab, Kyoto Institute of Technology, Goshokaido-cho, Matsugasaki, Sakyo-ku, Kyoto 606-8585, Japan.

### Contents:

1. Synthesis
2. NMR Spectra
3. Test of nucleophilicity
4. DFT calculations
5. Reference

## 1. Synthesis

### Products of the catalytic arsa-Wittig reactions using **5**

*(E)*-Ethyl cinnamate (**8**).<sup>[1]</sup> Product: 112 mg, 0.640 mmol, 67%. Benzaldehyde (107 mg, 1.01 mmol), ethyl bromoacetate (201 mg, 1.20 mmol), (EtO)<sub>3</sub>SiH (197 mg, 1.20 mmol), Cy<sub>2</sub>MeN (234 mg, 1.20 mmol) and tris(*p*-(dimethylamino)phenyl)arsine (**5**, 45 mg, 0.10 mmol) were used. <sup>1</sup>H-NMR (CDCl<sub>3</sub>, 400 MHz): δ= 7.69 (d, *J* = 16.0 Hz, 1H), 7.54-7.51 (m, 2H), 7.38 (t, *J* = 4.0 Hz, 3H), 6.44 (d, *J* = 16.0 Hz, 1H), 4.27 (q, *J* = 6.7 Hz, 2H), 1.34 (t, *J* = 8.0 Hz, 3H) ppm.

*Ethyl (2E)*-3-(4-cyanophenyl)-2-propenoate (**9**).<sup>[2]</sup> Product: 145 mg, 0.721 mmol, 72%. 4-Cyanobenzaldehyde (130 mg, 0.991 mmol), ethyl bromoacetate (201 mg, 1.20 mmol), (EtO)<sub>3</sub>SiH (197 mg, 1.20 mmol), Cy<sub>2</sub>MeN (235 mg, 1.20 mmol) and tris(*p*-(dimethylamino)phenyl)arsine (**5**, 44 mg, 0.10 mmol) were used. <sup>1</sup>H-NMR (CDCl<sub>3</sub>, 400 MHz): δ= 7.70-7.60 (m, 5H), 6.52 (d, *J* = 16.0 Hz, 1H), 4.29 (q, *J* = 6.7 Hz, 2H), 1.35 (t, *J* = 8.0 Hz, 3H) ppm.

*Ethyl (2E)*-3-(2-fluorophenyl)-2-propenoate (**10**).<sup>[3]</sup> Product: 134 mg, 0.690 mmol, 69%. 2-Fluorobenzaldehyde (124 mg, 0.999 mmol), ethyl bromoacetate (201 mg, 1.20 mmol), (EtO)<sub>3</sub>SiH (197 mg, 1.20 mmol), Cy<sub>2</sub>MeN (235 mg, 1.20 mmol) and tris(*p*-(dimethylamino)phenyl)arsine (**5**, 43 mg, 0.099 mmol) were used. <sup>1</sup>H-NMR (CDCl<sub>3</sub>, 400 MHz): δ= 7.81 (d, 1H, *J* = 16.2 Hz), 7.53 (td, 1H, *J* = 7.6, 1.6 Hz), 7.38-7.34 (m, 1H), 7.16 (td, 1H, *J* = 7.6, 1.0), 7.09 (ddd, *J* = 10.7, 8.3, 1.1), 6.53 (d, 1H, *J* = 16.2 Hz), 4.27 (q, 2H, *J* = 7.2 Hz), 1.34 (t, 3H, *J* = 7.2 Hz) ppm.

*(E)*-Ethyl 3-(2-chlorophenyl)prop-2-enoate (**11**).<sup>[2]</sup> Product: 138 mg, 0.655 mmol, 65%. 2-Chlorobenzaldehyde (141 mg, 1.00 mmol), ethyl bromoacetate (200 mg, 1.20 mmol), (EtO)<sub>3</sub>SiH (198 mg, 1.21 mmol), Cy<sub>2</sub>MeN (236 mg, 1.21 mmol) and tris(*p*-(dimethylamino)phenyl)arsine (**5**, 45 mg, 0.10 mmol) were used. <sup>1</sup>H-NMR (CDCl<sub>3</sub>, 400 MHz): δ= 8.09 (d, *J* = 16.0 Hz, 1H), 7.63-7.60 (m, 1H), 7.42-7.40 (m, 1H), 7.32-7.27 (m, 2H), 6.43 (d, *J* = 16.0 Hz, 1H), 4.29 (q, *J* = 8.0 Hz, 2H), 1.35 (t, *J* = 8.0 Hz, 3H) ppm.

*Ethyl (2E)*-3-(2-bromophenyl)-2-propenoate (**12**).<sup>[4]</sup> Product: 161 mg, 0.631 mmol, 63%. 2-Bromobenzaldehyde (185 mg, 1.00 mmol), ethyl bromoacetate (200 mg, 1.20 mmol), (EtO)<sub>3</sub>SiH (197 mg, 1.20 mmol), Cy<sub>2</sub>MeN (235 mg, 1.20 mmol) and tris(*p*-(dimethylamino)phenyl)arsine (**5**, 45 mg, 0.10 mmol) were used. <sup>1</sup>H-NMR (CDCl<sub>3</sub>, 400

MHz):  $\delta$  = 8.05 (d,  $J$  = 16.0 Hz, 1H), 7.62-7.59 (m, 2H), 7.32 (t,  $J$  = 7.2 Hz, 1H), 7.22 (td,  $J$  = 8.0, 1.6 Hz, 1H), 6.39 (d,  $J$  = 16.0 Hz, 1H), 4.28 (q,  $J$  = 7.2 Hz, 2H), 1.35 (t,  $J$  = 7.2 Hz, 3H) ppm.

*(E)*-Ethyl 3-(4-fluorophenyl)prop-2-enoate (**13**).<sup>[5]</sup> Product: 113 mg, 0.582 mmol, 58%. 2-Fluorobenzaldehyde (125 mg, 1.01 mmol), ethyl bromoacetate (200 mg, 1.20 mmol), (EtO)<sub>3</sub>SiH (196 mg, 1.19 mmol), Cy<sub>2</sub>MeN (235 mg, 1.20 mmol) and tris(*p*-dimethylamino)phenylarsine (**5**, 44 mg, 0.10 mmol) were used. <sup>1</sup>H-NMR (CDCl<sub>3</sub>, 400 MHz):  $\delta$  = 7.65 (d,  $J$  = 16.0 Hz, 1H), 7.53-7.49 (m, 2H), 7.10-7.05 (t,  $J$  = 10.0 Hz, 2H), 6.36 (d,  $J$  = 16.0 Hz, 1H), 4.27 (q,  $J$  = 4.0 Hz, 2H), 1.34 (t,  $J$  = 8.0 Hz, 3H) ppm.

*(E)*-Ethyl 3-(4-chlorophenyl)prop-2-enoate (**14**).<sup>[6]</sup> Product: 148 mg, 0.703 mmol, 70%. 4-Chlorobenzaldehyde (141 mg, 1.00 mmol), ethyl bromoacetate (200 mg, 1.20 mmol), (EtO)<sub>3</sub>SiH (197 mg, 1.20 mmol), Cy<sub>2</sub>MeN (234 mg, 1.20 mmol) and tris(*p*-dimethylamino)phenylarsine (**5**, 44 mg, 0.10 mmol) were used. <sup>1</sup>H-NMR (CDCl<sub>3</sub>, 400 MHz):  $\delta$  = 7.63 (d,  $J$  = 16.0 Hz, 1H), 7.45 (d,  $J$  = 12.0 Hz, 2H), 7.35 (d,  $J$  = 12.0 Hz, 2H), 6.40 (d,  $J$  = 16.0 Hz, 1H), 4.27 (q,  $J$  = 6.7 Hz, 2H), 1.34 (t,  $J$  = 8.0 Hz, 3H) ppm.

*(E)*-Ethyl 3-(4-bromophenyl)prop-2-enoate (**15**).<sup>[7]</sup> Product: 187 mg, 0.733 mmol, 74%. 4-Bromobenzaldehyde (184 mg, 0.994 mmol), ethyl bromoacetate (201 mg, 1.20 mmol), (EtO)<sub>3</sub>SiH (198 mg, 1.21 mmol), Cy<sub>2</sub>MeN (234 mg, 1.20 mmol) and tris(*p*-dimethylamino)phenylarsine (**5**, 45 mg, 0.10 mmol) were used. <sup>1</sup>H-NMR (CDCl<sub>3</sub>, 400 MHz):  $\delta$  = 7.61 (d,  $J$  = 16.0 Hz, 1H), 7.51 (d,  $J$  = 8.0 Hz, 2H), 7.38 (d,  $J$  = 8.0 Hz, 2H), 6.42 (d,  $J$  = 16.0 Hz, 1H), 4.26 (q,  $J$  = 4.0 Hz, 2H), 1.34 (t,  $J$  = 6.0 Hz, 3H) ppm.

*Ethyl cinnamylideneacetate* (**16**).<sup>[8]</sup> Product: 86 mg, 0.43 mmol, 43%. *trans*-Cinnamaldehyde (132 mg, 0.999 mmol), ethyl bromoacetate (201 mg, 1.20 mmol), (EtO)<sub>3</sub>SiH (197 mg, 1.20 mmol), Cy<sub>2</sub>MeN (234 mg, 1.20 mmol) and tris(*p*-dimethylamino)phenylarsine (**5**, 44 mg, 0.10 mmol) were used. <sup>1</sup>H-NMR (CDCl<sub>3</sub>, 400 MHz):  $\delta$  = 7.48-7.28 (m, 6H), 6.93-6.87 (m, 2H), 5.99 (d,  $J$  = 16.0 Hz, 1H), 4.23 (q,  $J$  = 6.7 Hz, 2H), 1.32 (t,  $J$  = 8.0 Hz, 3H) ppm.

*(E)*-Ethyl 3-(naphthalene-2-yl)prop-2-enoate (**17**).<sup>[9]</sup> Product: 117 mg, 0.517 mmol, 52%. 1-Naphthaldehyde (157 mg, 1.01 mmol), ethyl bromoacetate (200 mg, 1.20 mmol), (EtO)<sub>3</sub>SiH (198 mg, 1.21 mmol), Cy<sub>2</sub>MeN (235 mg, 1.20 mmol) and tris(*p*-dimethylamino)phenylarsine (**5**, 43 mg, 0.099 mmol) were used. <sup>1</sup>H-NMR (CDCl<sub>3</sub>, 400

MHz):  $\delta$ = 8.52 (d,  $J$  = 16.0 Hz, 1H), 8.18 (d,  $J$  = 12.0 Hz, 1H), 7.86 (t,  $J$  = 8.0 Hz, 2H), 7.73 (d,  $J$  = 8.0 Hz, 1H), 7.58-7.44 (m, 3H), 6.52 (d,  $J$  = 16.0 Hz, 1H), 4.31 (q,  $J$  = 5.3 Hz, 2H), 1.37 (t,  $J$  = 6.0 Hz, 3H) ppm.

*(E)*-Ethyl 3-(2-thienyl)-2-propenoate (**18**).<sup>[8]</sup> Product: 114 mg, 0.626 mmol, 62%. 2-Thiophenecarboxyaldehyde (112 mg, 0.999 mmol), ethyl bromoacetate (200 mg, 1.20 mmol), (EtO)<sub>3</sub>SiH (197 mg, 1.20 mmol), Cy<sub>2</sub>MeN (235 mg, 1.20 mmol) and tris(*p*-dimethylamino)phenylarsine (**5**, 44 mg, 0.10 mmol) were used. <sup>1</sup>H-NMR (CDCl<sub>3</sub>, 400 MHz):  $\delta$ = 7.78 (d,  $J$  = 16.0 Hz, 1H), 7.37 (d,  $J$  = 4.0 Hz, 1H), 7.25 (d,  $J$  = 4.0 Hz, 1H), 7.06-7.04 (m, 1H), 6.24 (d,  $J$  = 16.0 Hz, 1H), 4.25 (q,  $J$  = 6.7 Hz, 2H), 1.33 (t,  $J$  = 6.0 Hz, 3H) ppm.

*(E)*-Ethyl 3-[4-(*N,N*-dimethylamino)phenyl]prop-2-enoate (**19**).<sup>[8]</sup> NMR yield: 3%. *p*-Dimethylaminobenzaldehyde (149 mg, 0.999 mmol), ethyl bromoacetate (202 mg, 1.21 mmol), (EtO)<sub>3</sub>SiH (197 mg, 1.20 mmol), Cy<sub>2</sub>MeN (234 mg, 1.20 mmol) and tris(*p*-dimethylamino)phenylarsine (**5**, 44 mg, 0.10 mmol) were used. <sup>1</sup>H-NMR (CDCl<sub>3</sub>, 400 MHz):  $\delta$ = 7.62 (d,  $J$  = 16.0 Hz, 1H), 7.44-7.36 (m, 2H), 6.67 (d,  $J$  = 12.0 Hz, 2H), 6.22 (d,  $J$  = 16.0 Hz, 1H), 4.23 (q,  $J$  = 4.0 Hz, 2H), 3.01 (s, 6H), 1.33 (t,  $J$  = 6.0 Hz, 3H) ppm.

*(E)*-Ethyl 3-(4-methylphenyl)prop-2-enoate (**20**).<sup>[9]</sup> Product: 75 mg, 0.39 mmol, 39%. *p*-Tolualdehyde (120 mg, 0.999 mmol), ethyl bromoacetate (200 mg, 1.20 mmol), (EtO)<sub>3</sub>SiH (198 mg, 1.21 mmol), Cy<sub>2</sub>MeN (235 mg, 1.20 mmol) and tris(*p*-dimethylamino)phenylarsine (**5**, 44 mg, 0.10 mmol) were used. <sup>1</sup>H-NMR (CDCl<sub>3</sub>, 400 MHz):  $\delta$ = 7.66 (d,  $J$  = 16.0 Hz, 1H), 7.42 (d,  $J$  = 8.0 Hz, 2H), 7.19 (d,  $J$  = 8.0 Hz, 2H), 6.39 (d,  $J$  = 16.0 Hz, 1H), 4.26 (q,  $J$  = 8.0 Hz, 2H), 2.37 (s, 3H), 1.33 (t,  $J$  = 8.0 Hz, 3H) ppm.

*(E)*-Ethyl 3-(4-methoxyphenyl)prop-2-enoate (**21**).<sup>[9]</sup> Product: 51 mg, 0.25 mmol, 25%. *p*-Anisaldehyde (137 mg, 1.01 mmol), ethyl bromoacetate (200 mg, 1.20 mmol), (EtO)<sub>3</sub>SiH (197 mg, 1.20 mmol), Cy<sub>2</sub>MeN (235 mg, 1.20 mmol) and tris(*p*-dimethylamino)phenylarsine (**5**, 43 mg, 0.099 mmol) were used. <sup>1</sup>H-NMR (CDCl<sub>3</sub>, 400 MHz):  $\delta$ = 7.64 (d,  $J$  = 16.0 Hz, 1H), 7.44-7.36 (m, 2H), 6.67 (d,  $J$  = 12.0 Hz, 2H), 6.22 (d,  $J$  = 16.0 Hz, 1H), 4.23 (q,  $J$  = 4.0 Hz, 2H), 3.01 (s, 6H), 1.33 (t,  $J$  = 6.0 Hz, 3H) ppm.

*Ethyl (2E)-cyclohexylprop-2-enoate (22)*.<sup>[2]</sup> NMR yield: 33%. Cyclohexanecarboxaldehyde (112 mg, 0.998 mmol), ethyl bromoacetate (201 mg, 1.20

mmol), (EtO)<sub>3</sub>SiH (197 mg, 1.20 mmol), Cy<sub>2</sub>MeN (234 mg, 1.20 mmol) and tris(*p*-(dimethylamino)phenyl)arsine (**5**, 44 mg, 0.10 mmol) were used. <sup>1</sup>H-NMR (CDCl<sub>3</sub>, 400 MHz): δ= 6.92 (dd, *J* = 16.0 Hz, 1H), 5.76 (d, *J* = 16.0 Hz, 1H), 4.19 (q, *J* = 6.7 Hz, 2H), 1.29 (t, *J* = 8.0 Hz, 3H), 1.26-1.10 (m, 5H) ppm.

(*E*)-Methyl cinnamate (**23**).<sup>[1]</sup> Product: 90 mg, 0.55 mmol, 55%. Benzaldehyde (107 mg, 1.01 mmol), methyl bromoacetate (184 mg, 1.20 mmol), (EtO)<sub>3</sub>SiH (198 mg, 1.21 mmol), Cy<sub>2</sub>MeN (235 mg, 1.20 mmol) and tris(*p*-(dimethylamino)phenyl)arsine (**5**, 45 mg, 0.10 mmol) were used. <sup>1</sup>H-NMR (CDCl<sub>3</sub>, 400 MHz): δ= 7.70 (d, *J* = 16.0 Hz, 1H), 7.53-7.50 (m, 2H), 7.38 (t, *J* = 6.0 Hz, 3H), 6.45 (d, *J* = 16.0 Hz, 1H), 3.81 (s, 3H) ppm.

(*E*)-Cinnamionitrile (**25**).<sup>[10]</sup> NMR yield: 11%. Benzaldehyde (106 mg, 0.999 mmol), bromoacetonitrile (144 mg, 1.20 mmol), (EtO)<sub>3</sub>SiH (198 mg, 1.21 mmol), Cy<sub>2</sub>MeN (236 mg, 1.21 mmol) and tris(*p*-(dimethylamino)phenyl)arsine (**5**, 44 mg, 0.10 mmol) were used. <sup>1</sup>H-NMR (CDCl<sub>3</sub>, 400 MHz): δ= 7.46-7.39 (m, 6H), 5.88 (d, *J* = 16.0 Hz, 1H) ppm.

## 2. NMR Spectra

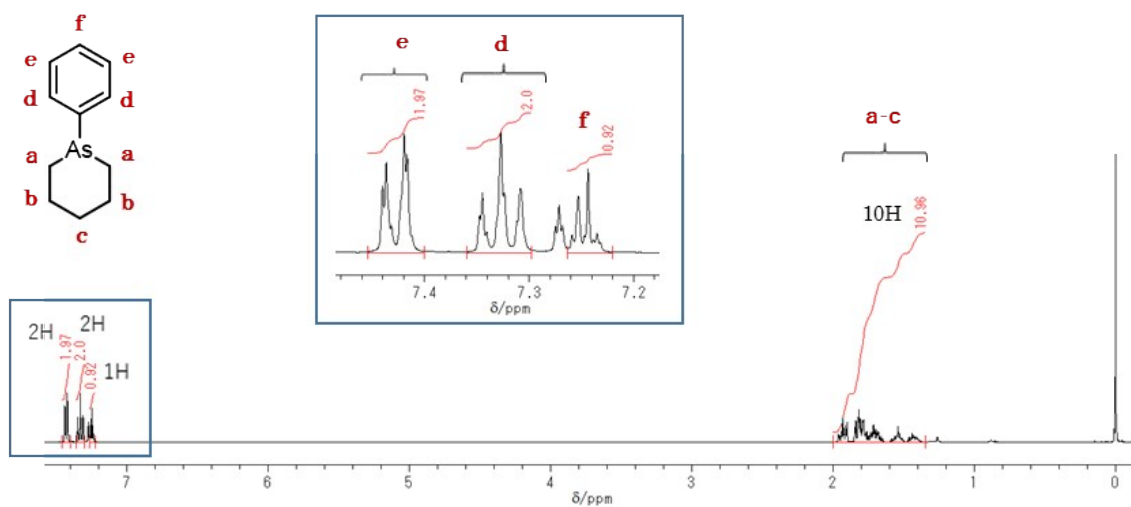

**Figure S1.**  $^1\text{H-NMR}$  spectrum (400 MHz) of **2** in  $\text{CDCl}_3$ .

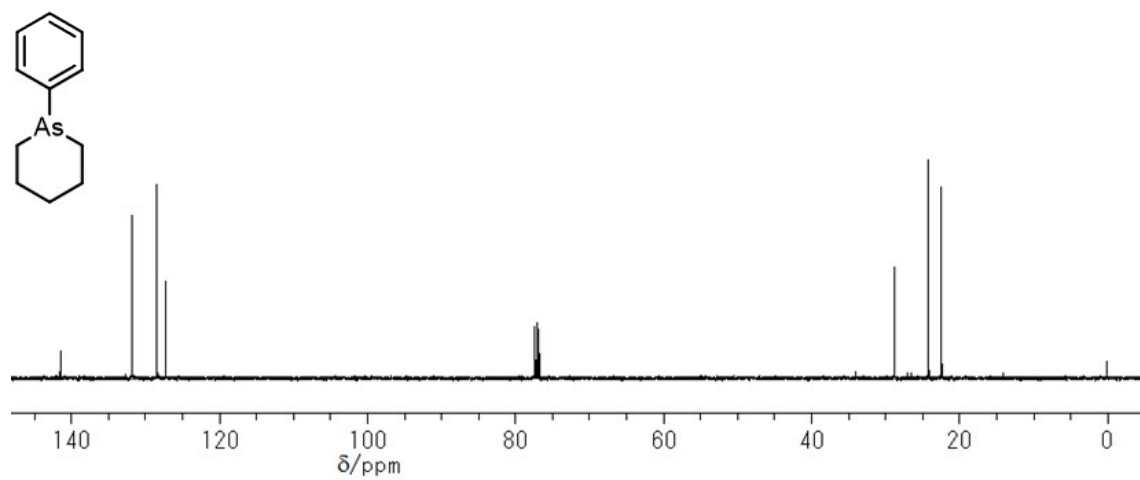

**Figure S2.**  $^{13}\text{C-NMR}$  spectrum (100 MHz) of **2** in  $\text{CDCl}_3$ .

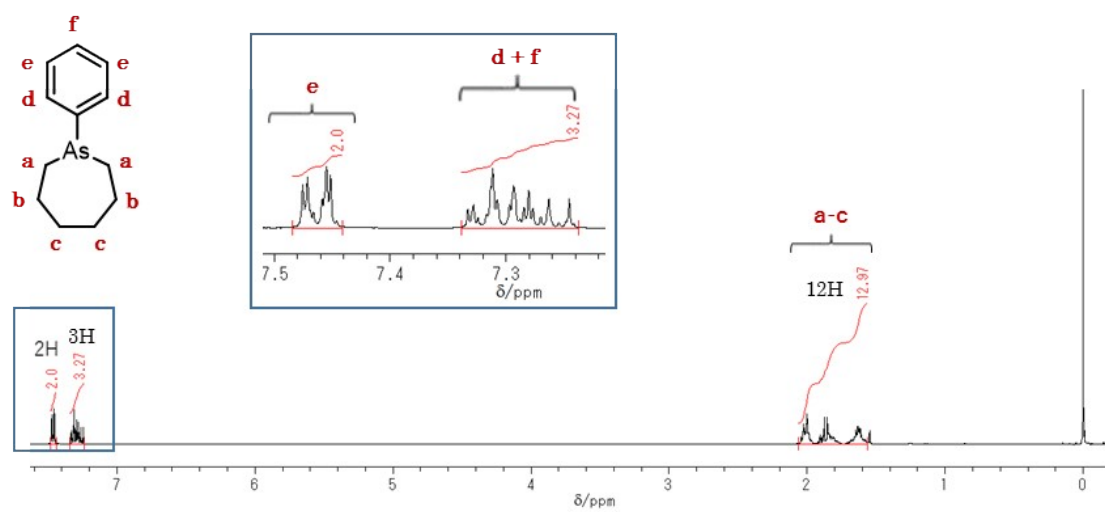

**Figure S3.**  $^1\text{H-NMR}$  spectrum (400 MHz) of **3** in  $\text{CDCl}_3$ .

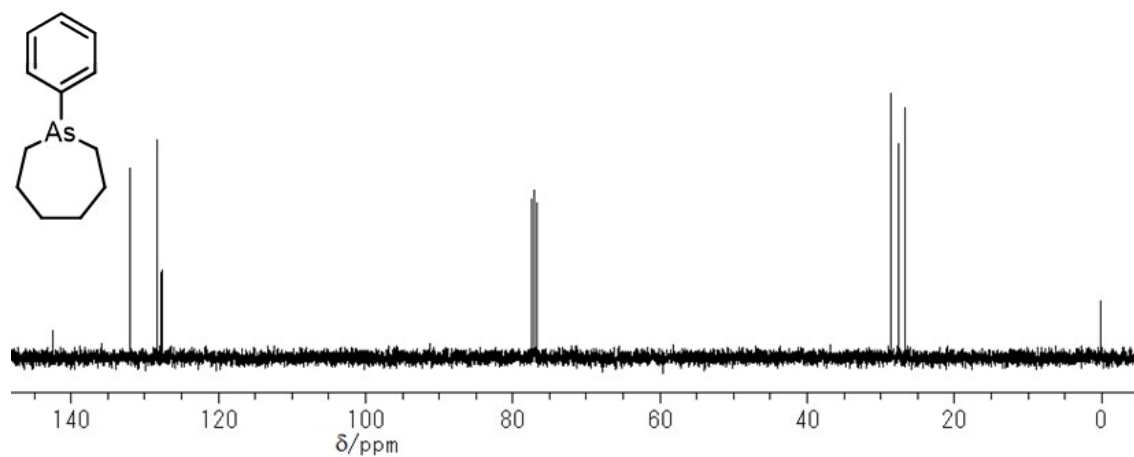

**Figure S4.**  $^{13}\text{C-NMR}$  spectrum (100 MHz) of **3** in  $\text{CDCl}_3$ .

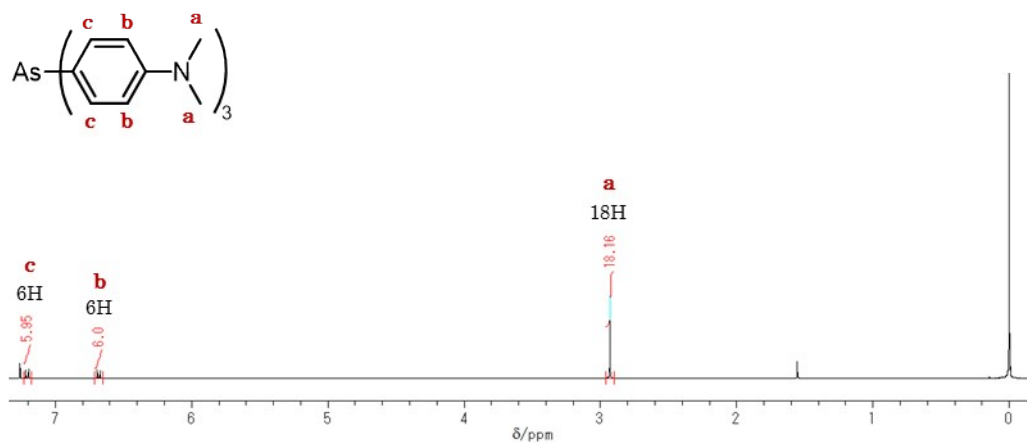

**Figure S5.** <sup>1</sup>H-NMR spectrum (400 MHz) of **5** in CDCl<sub>3</sub>.

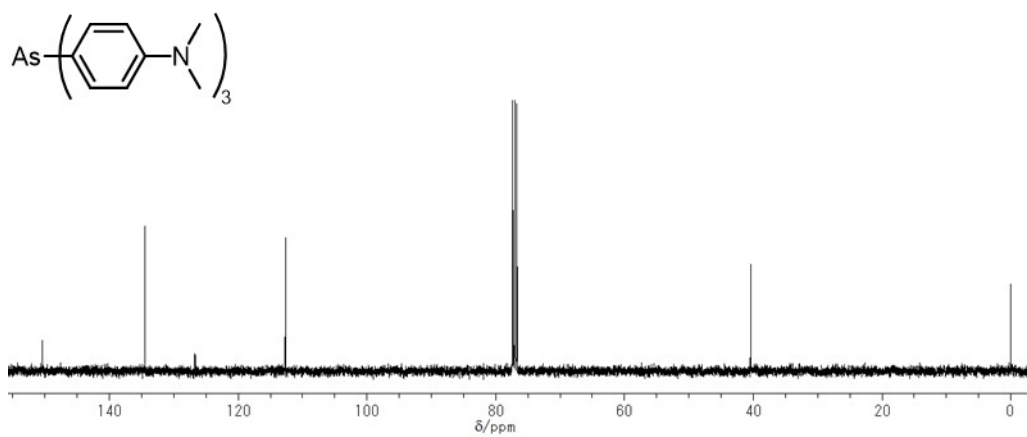

**Figure S6.** <sup>13</sup>C-NMR spectrum (100 MHz) of **5** in CDCl<sub>3</sub>.



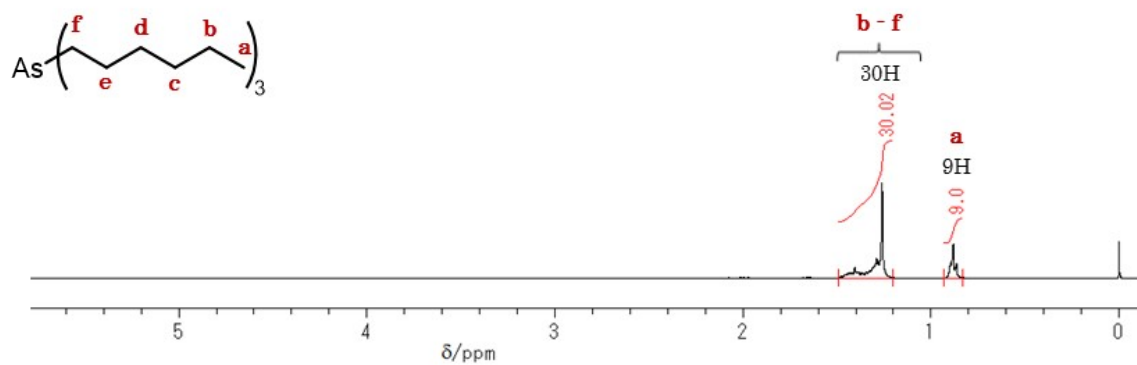

**Figure S7.**  $^1\text{H-NMR}$  spectrum (400 MHz) of **6** in  $\text{CDCl}_3$ .

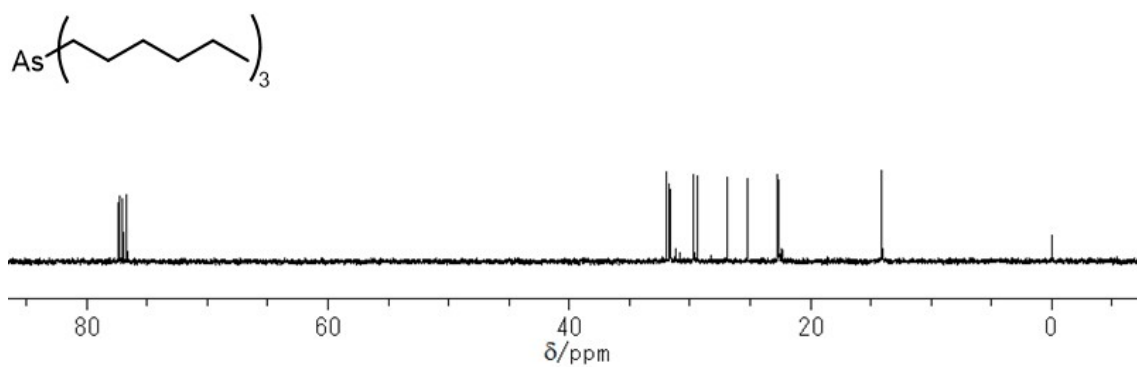

**Figure S8.**  $^{13}\text{C-NMR}$  spectrum (100 MHz) of **6** in  $\text{CDCl}_3$ .

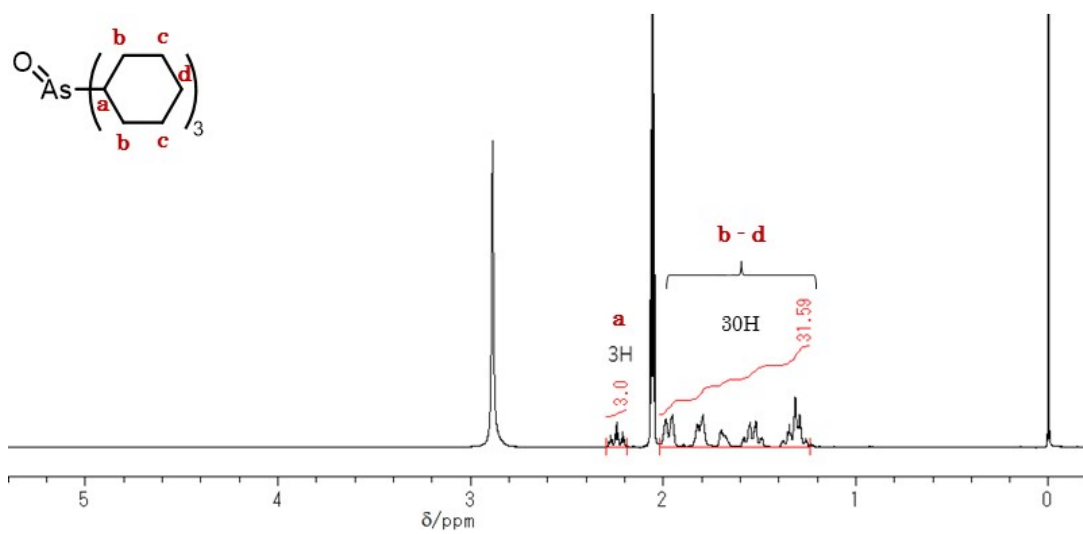

**Figure S9.**  $^1\text{H-NMR}$  spectrum (400 MHz) of **7** in  $\text{CDCl}_3$ .

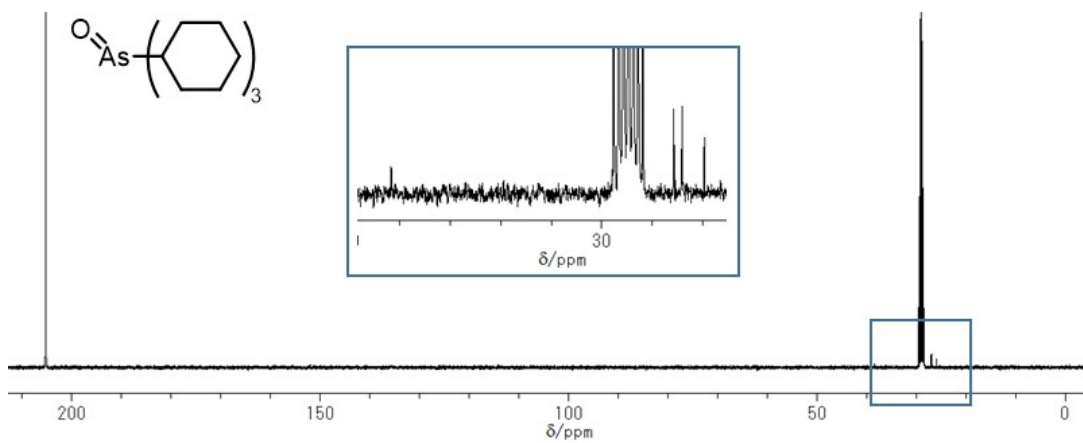

**Figure S10.**  $^{13}\text{C-NMR}$  spectrum (100 MHz) of **7** in  $\text{CDCl}_3$ .

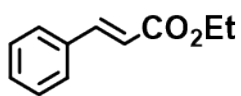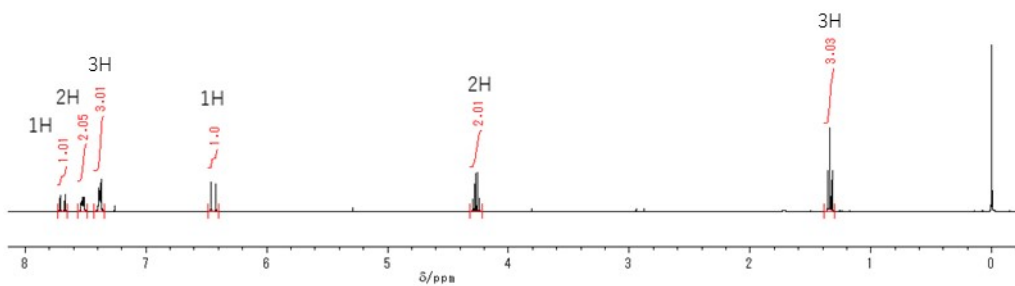

Figure S11.  $^1\text{H}$ -NMR spectrum (400 MHz) of **8** in  $\text{CDCl}_3$ .

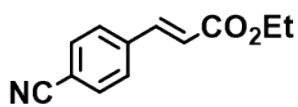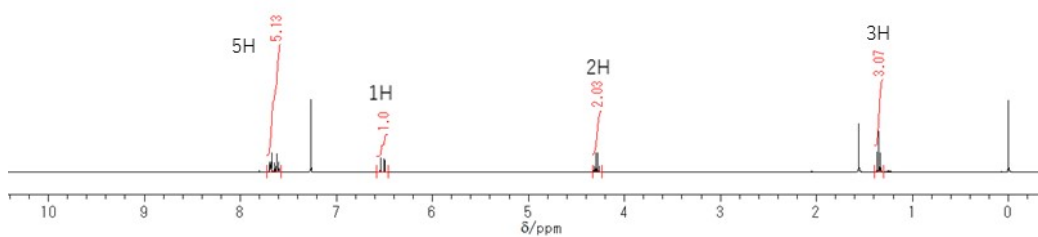

Figure S12.  $^1\text{H}$ -NMR spectrum (400 MHz) of **9** in  $\text{CDCl}_3$ .

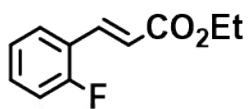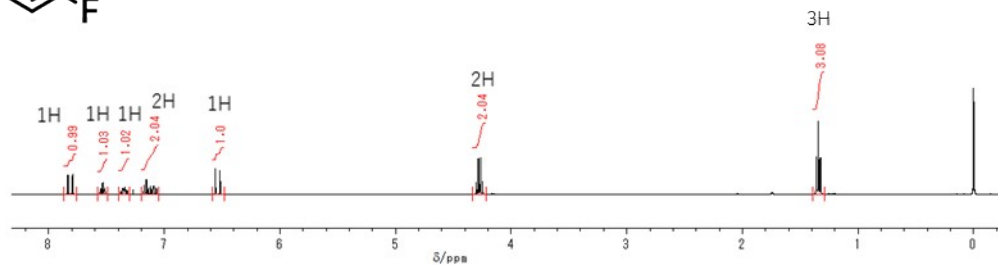

Figure S13.  $^1\text{H}$ -NMR spectrum (400 MHz) of **10** in  $\text{CDCl}_3$ .

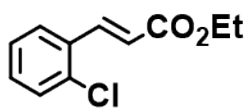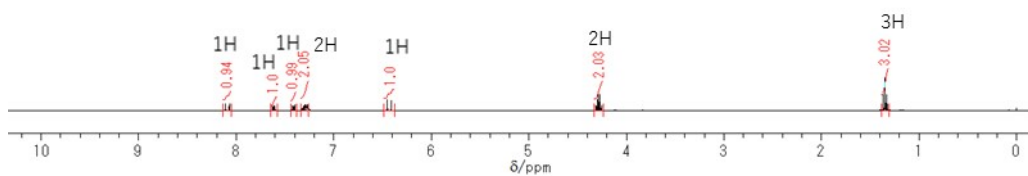

Figure S14. <sup>1</sup>H-NMR spectrum (400 MHz) of **11** in CDCl<sub>3</sub>.

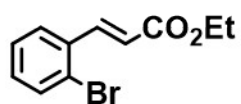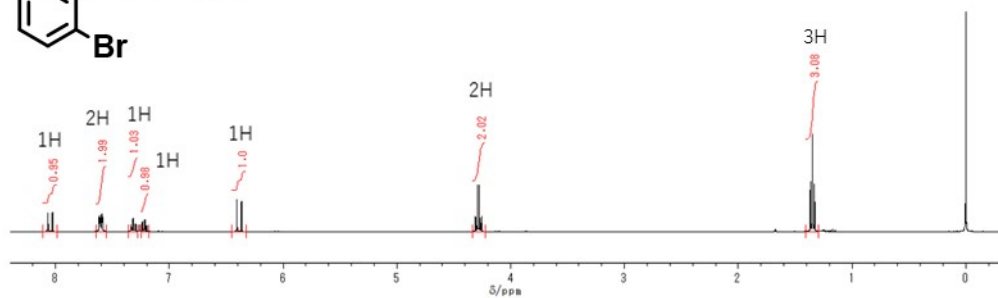

Figure S15. <sup>1</sup>H-NMR spectrum (400 MHz) of **12** in CDCl<sub>3</sub>.

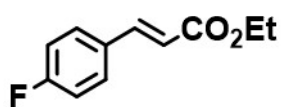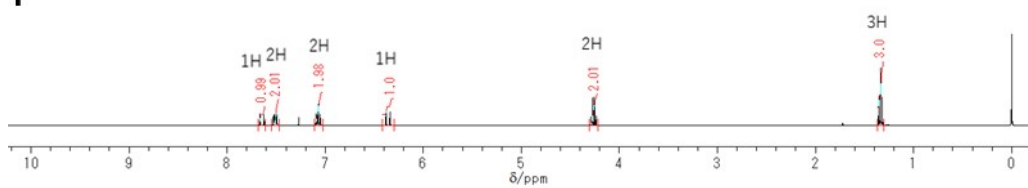

Figure S16. <sup>1</sup>H-NMR spectrum (400 MHz) of **13** in CDCl<sub>3</sub>.

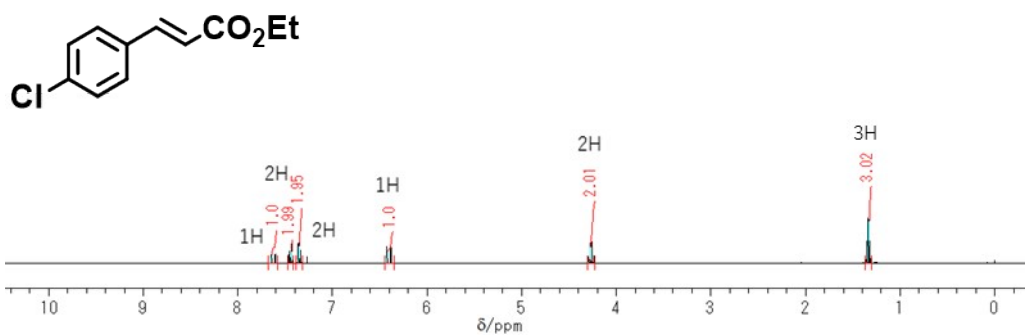

**Figure S17.**  $^1\text{H-NMR}$  spectrum (400 MHz) of **14** in  $\text{CDCl}_3$ .

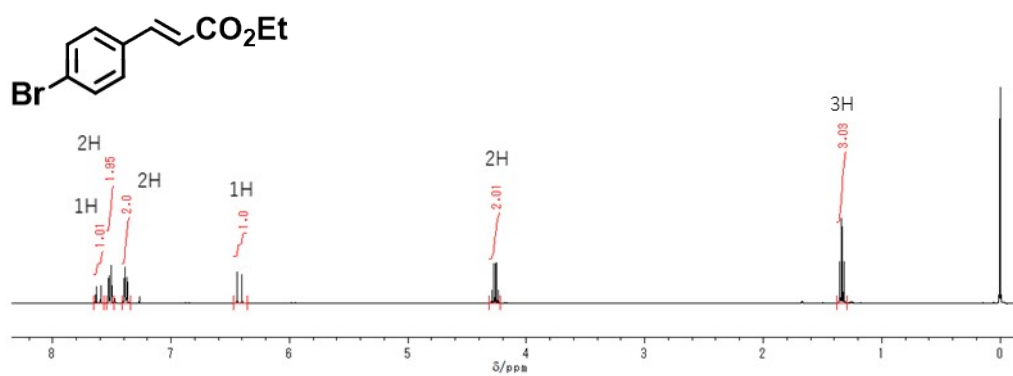

**Figure S18.**  $^1\text{H-NMR}$  spectrum (400 MHz) of **15** in  $\text{CDCl}_3$ .

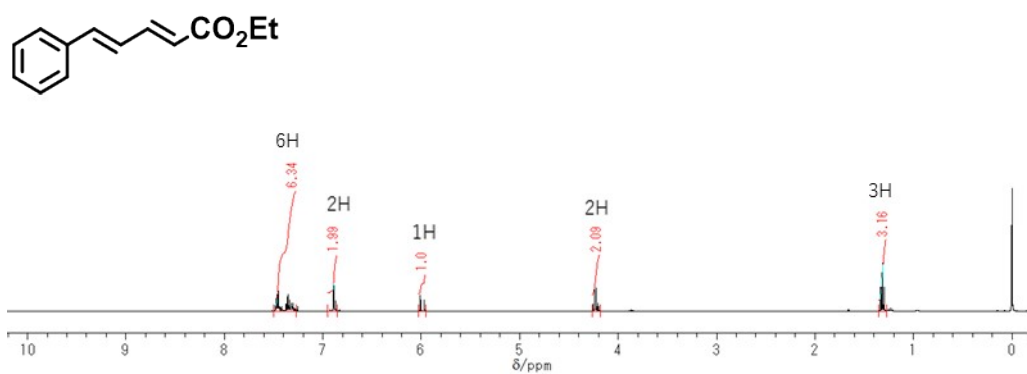

**Figure S19.**  $^1\text{H-NMR}$  spectrum (400 MHz) of **16** in  $\text{CDCl}_3$ .

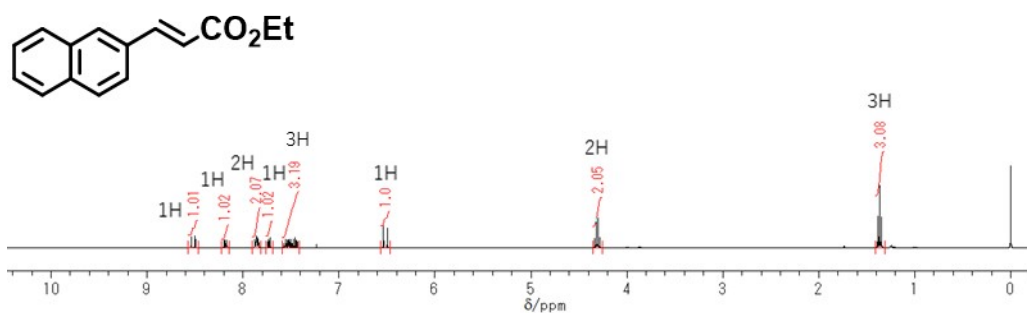

**Figure S20.**  $^1\text{H-NMR}$  spectrum (400 MHz) of 17 in  $\text{CDCl}_3$ .

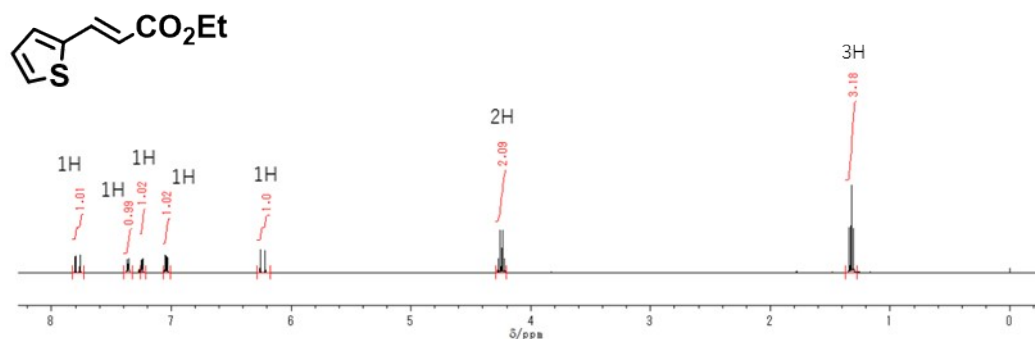

**Figure S21.**  $^1\text{H-NMR}$  spectrum (400 MHz) of 18 in  $\text{CDCl}_3$ .

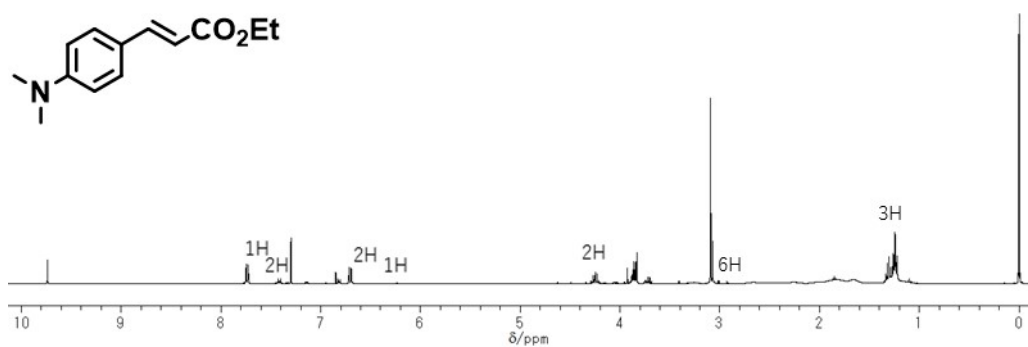

**Figure S22.**  $^1\text{H-NMR}$  spectrum (400 MHz) of 19 (crude) in  $\text{CDCl}_3$ .

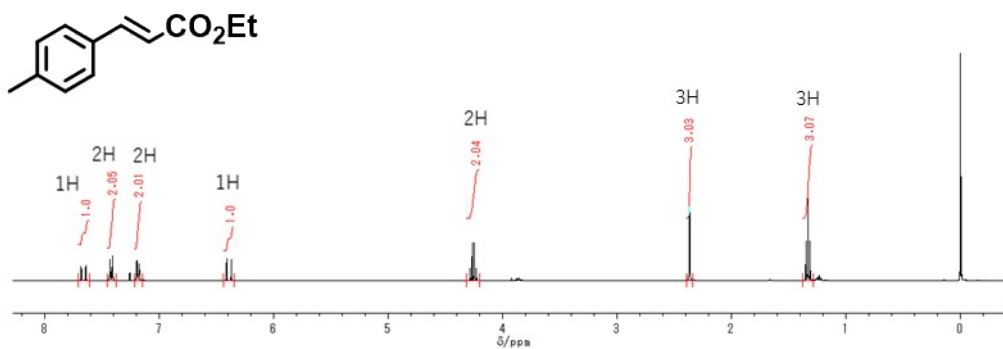

**Figure S23.**  $^1\text{H-NMR}$  spectrum (400 MHz) of **20** in  $\text{CDCl}_3$ .

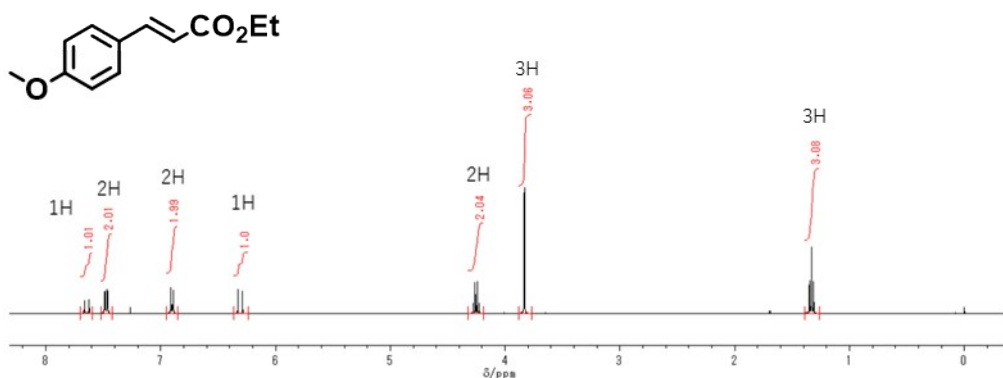

**Figure S24.**  $^1\text{H-NMR}$  spectrum (400 MHz) of **21** in  $\text{CDCl}_3$ .

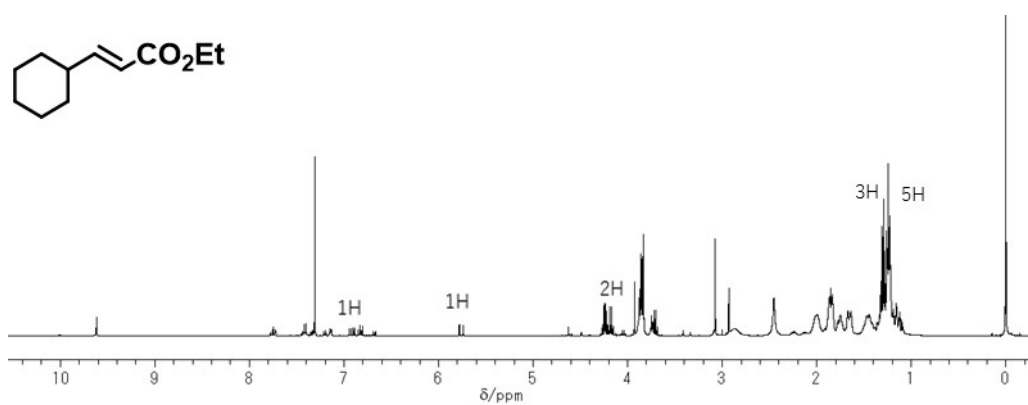

**Figure S25.**  $^1\text{H-NMR}$  spectrum (400 MHz) of **22** (crude) in  $\text{CDCl}_3$ .

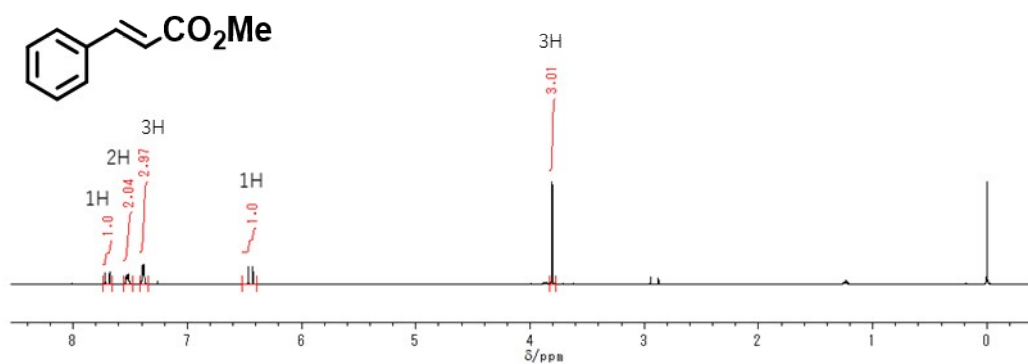

**Figure S26.**  $^1\text{H-NMR}$  spectrum (400 MHz) of **23** in  $\text{CDCl}_3$ .

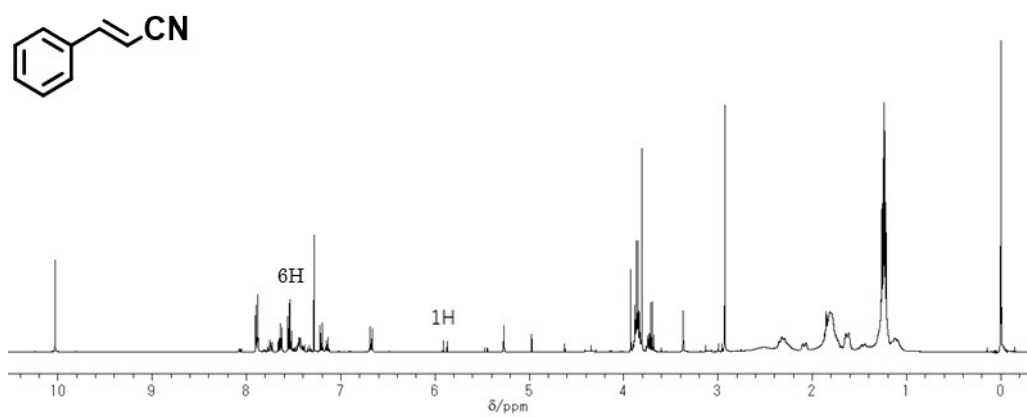

**Figure S27.**  $^1\text{H-NMR}$  spectrum (400 MHz) of **25** (crude) in  $\text{CDCl}_3$ .



### 3. Test of nucleophilicity

The nucleophilicities of **1** and **5** were compared by the reaction with ethyl bromoacetate. A toluene solution (1 mL) of **1** (88.6 mg, 0.43 mmol) or **5** (84.8 mg, 0.42 mmol) and ethyl bromoacetate (84.8 mg, 0.51 mmol for **1**, 85.6 mg, 0.51 mmol for **5**) was stirred at 25 °C for 24 h. The reaction yield was estimated by <sup>1</sup>H-NMR spectrum with 1,3,5-trimethoxybenzene as an internal standard.

Arsonium salt of **1**: Yield 43%. <sup>1</sup>H-NMR (CDCl<sub>3</sub>, 400 MHz):  $\delta$  = 8.01-7.98 (m, 2H), 7.65-7.60 (m, 3H), 5.01 (s, 2H), 4.16(q,  $J$  = 8.0 Hz, 2H), 3.30(m, 2H), 2.77(m, 2H), 2.49(m, 2H), 2.06(m, 2H), 1.23(t,  $J$  = 8.0 Hz, 3H) ppm.

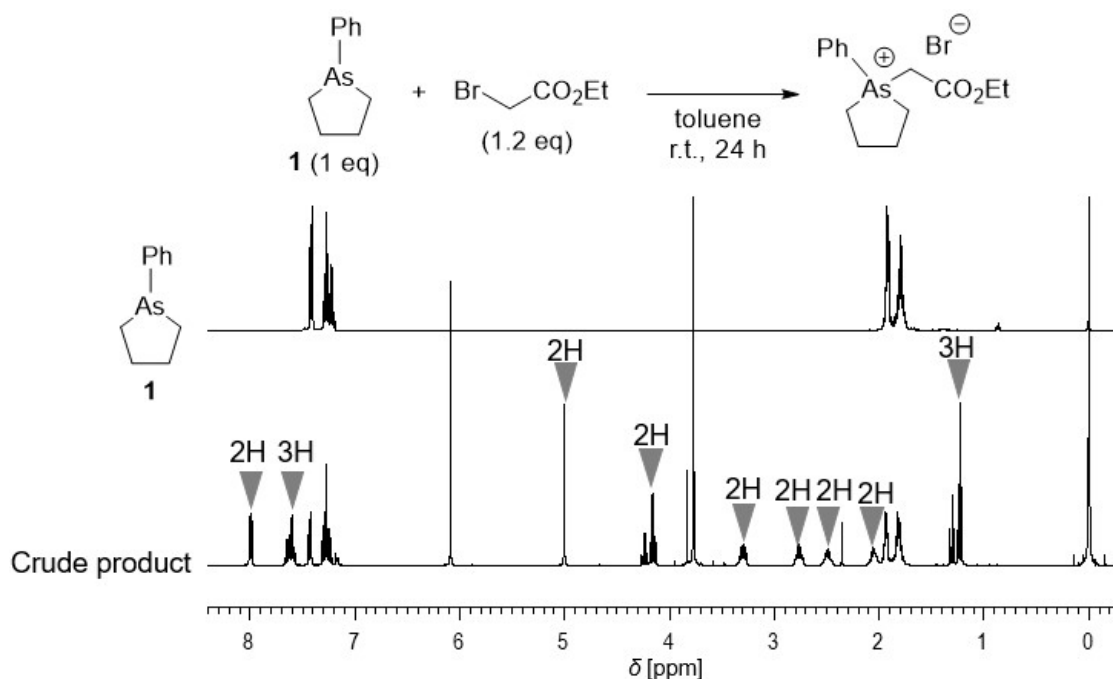

**Figure S28.** <sup>1</sup>H-NMR spectra (400 MHz in CDCl<sub>3</sub>) of **1** and the crude product. Inverted triangles indicate the product signals.

Arsonium salt of **5**: Yield 72%.  $^1\text{H-NMR}$  ( $\text{CDCl}_3$ , 400 MHz):  $\delta = 7.43$  (d,  $J = 8.0\text{Hz}$ , 6H), 6.81 (d,  $J = 8.0\text{Hz}$ , 6H), 4.33 (s, 2H), 4.03 (q,  $J = 8.0\text{ Hz}$ , 2H), 3.05 (s, 18H), 1.09 (t,  $J = 4.0\text{ Hz}$  3H) ppm.

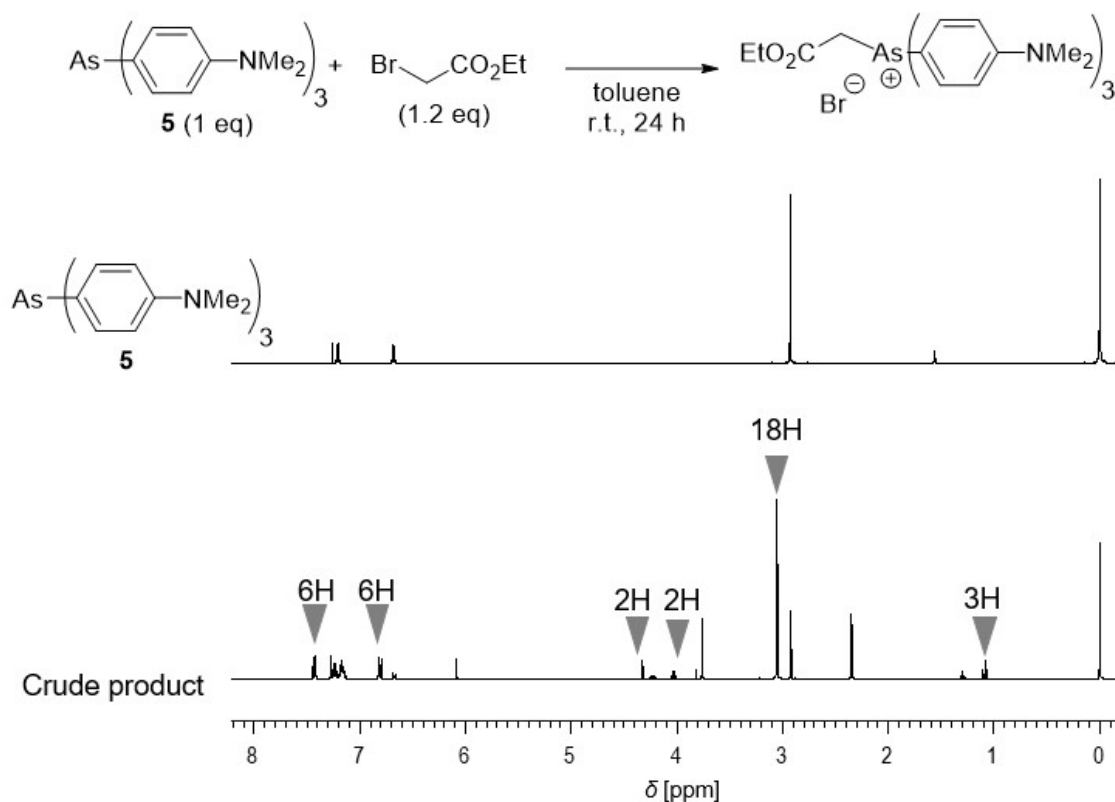

**Figure S29.**  $^1\text{H-NMR}$  spectra (400 MHz in  $\text{CDCl}_3$ ) of **5** and the crude product. Inverted triangles indicate the product signals.

#### 4. DFT calculations

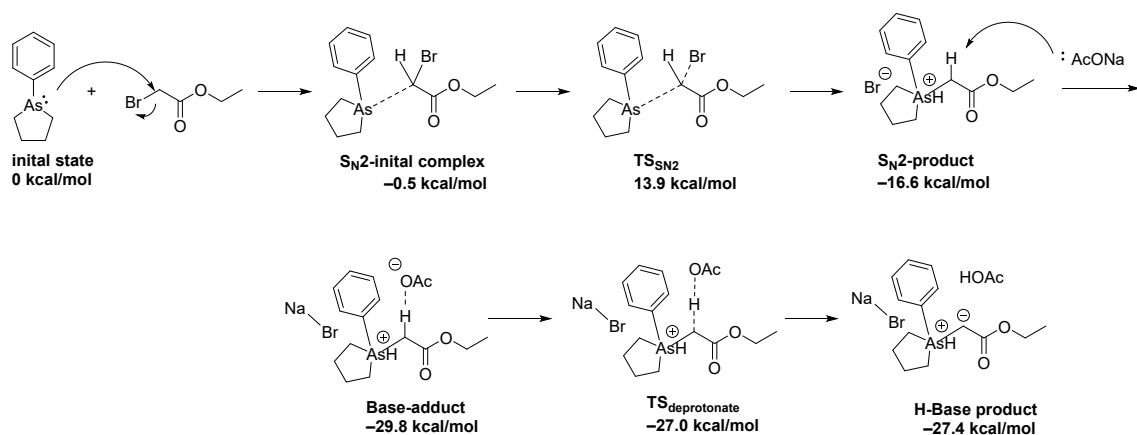

**Scheme S1.** Plausible mechanism of generation of arsonium ylide between bromoacetate and **1**.

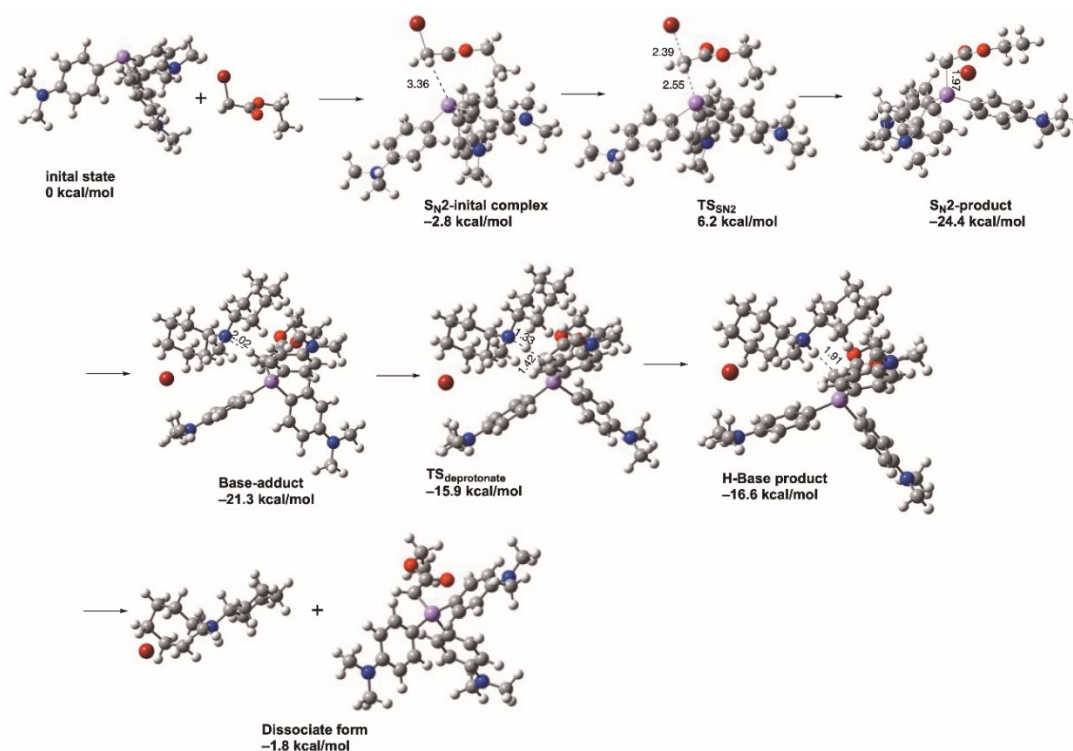

**Figure S30.** Optimized geometries for local minima and transition state during the  $S_N2$  reaction with ethyl bromoacetate and tris(*p*-(dimethylamino)phenyl)arsine (**5**) to form an arsonium salt, and the deprotonation of the resultant arsonium salt by the  $Cy_2MeN$  base to form an arsonium ylide. Their geometries were obtained at the B3LYP-D3 calculations using the polarizable continuum model to include solvent effects of THF. The energy values in kcal/mol are their free energies obtained at 25 °C.

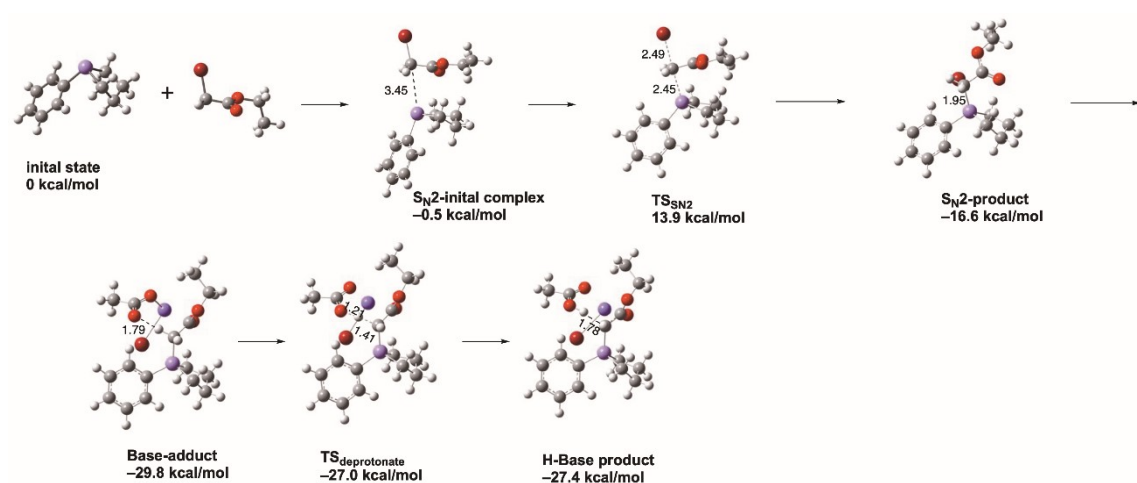

**Figure S31.** Optimized geometries for local minima and transition state during the  $S_N2$  reaction with ethyl bromoacetate and 1-phenylarsolane (**1**) to form an arsonium salt, and the deprotonation of the resultant arsonium salt by the sodium acetate base to form an arsonium ylide. Their geometries were obtained at the B3LYP-D3 calculations using the polarizable continuum model to include solvent effects of toluene. The energy values in kcal/mol are their free energies obtained at 25 °C.

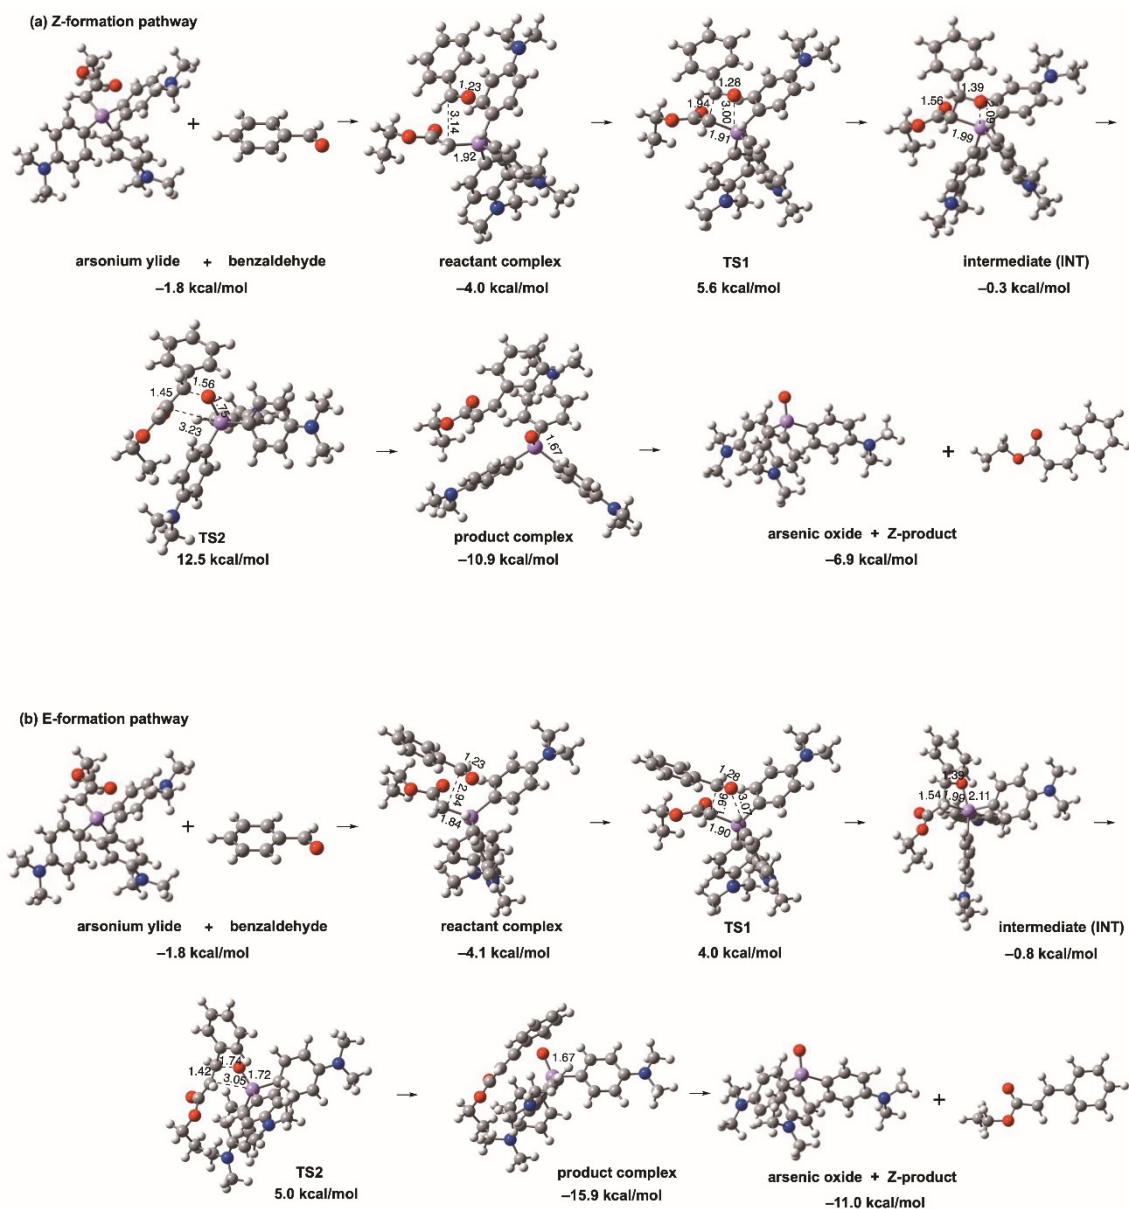

**Figure S32.** Optimized geometries for local minima and transition state during the reaction between benzaldehyde and the arsonium ylide formed from the first half reactions between ethyl bromoacetate, **5**, and the  $\text{Cy}_2\text{MeN}$  base. Their geometries were obtained at the B3LYP-D3 calculations using the polarizable continuum model to include solvent effects of THF. The energy values in kcal/mol are their free energies obtained at 25 °C. There are two reaction pathways to form *Z*- and *E*-ethyl cinnamate, given in (a) and (b), respectively.

**Cartesian coordinates of optimized geometries formed during the arsa-Wittig reactions discussed in the main text**

[A] S<sub>N</sub>2 reaction between ethyl bromoacetate and tris(*p*-(dimethylamino)phenyl)arsine (5) to form an arsonium salt, and the deprotonation of the resultant arsonium salt by the Cy<sub>2</sub>MeN base to form an arsonium ylide. Their total energies were obtained at the B3LYP-D3 calculations using the polarizable continuum model to include solvent effects of THF. Their free energies were also obtained at 25 °C.

(Scheme 3 & Figure S28)

(1) ethyl bromoacetate

Total energy: -3137.63060367 Hartree

Free energy: = -3137.290010 Hartree

|    |             |             |             |
|----|-------------|-------------|-------------|
| Br | -3.54925700 | -1.37689800 | -0.09007700 |
| N  | 0.82534600  | -0.34163400 | -0.43012400 |
| C  | 0.14399600  | -1.63207900 | -0.06018700 |
| H  | 0.20804700  | -1.76671300 | 1.01756000  |
| H  | -0.90730900 | -1.59010000 | -0.35396500 |
| H  | 0.64817800  | -2.44964500 | -0.57071600 |
| H  | 0.91105100  | -0.35135300 | -1.45084000 |
| C  | 2.25930000  | -0.19499700 | 0.11064000  |
| C  | 3.00809100  | -1.53017300 | 0.20676700  |
| C  | 3.03328400  | 0.78949300  | -0.77994900 |
| H  | 2.13559800  | 0.21837100  | 1.11658400  |
| C  | 4.42954600  | -1.29931700 | 0.75205700  |
| H  | 3.06743500  | -1.98888400 | -0.78884200 |
| H  | 2.48461500  | -2.22863400 | 0.86293700  |
| C  | 4.45259900  | 1.01991900  | -0.23716500 |
| H  | 3.09690600  | 0.36543200  | -1.79190000 |
| H  | 2.51119800  | 1.74649700  | -0.86434900 |
| C  | 5.21817100  | -0.30159300 | -0.10376100 |
| H  | 4.94906900  | -2.26149000 | 0.80443200  |
| H  | 4.35933500  | -0.92235900 | 1.78127800  |
| H  | 4.98210700  | 1.71195300  | -0.89984700 |
| H  | 4.38670700  | 1.50840400  | 0.74404000  |
| H  | 6.20697500  | -0.12574700 | 0.33333400  |

|   |             |             |             |
|---|-------------|-------------|-------------|
| H | 5.38208100  | -0.72858000 | -1.10244900 |
| C | -0.03382000 | 0.90110800  | -0.10340600 |
| C | -1.03487400 | 1.15686300  | -1.23351500 |
| C | -0.70951200 | 0.80022600  | 1.26643300  |
| H | 0.67978000  | 1.72813900  | -0.08007100 |
| C | -1.82485200 | 2.44522000  | -0.94111300 |
| H | -1.73850000 | 0.32042000  | -1.30317400 |
| H | -0.50122300 | 1.25002100  | -2.18847700 |
| C | -1.47982600 | 2.10501900  | 1.54135900  |
| H | -1.42786200 | -0.02510800 | 1.26612400  |
| H | 0.03275400  | 0.62074400  | 2.05271200  |
| C | -2.50761500 | 2.37518500  | 0.43260300  |
| H | -2.56653000 | 2.59657300  | -1.73255700 |
| H | -1.14469500 | 3.30819600  | -0.97356400 |
| H | -1.97575700 | 2.02621800  | 2.51458000  |
| H | -0.77523000 | 2.94589600  | 1.61094000  |
| H | -3.04661200 | 3.30788200  | 0.63452000  |
| H | -3.23846400 | 1.55747400  | 0.42069100  |

(2) tris(*p*-(dimethylamino)phenyl)arsine (**5**)

Total energy: -3330.73281405 Hartree

Free energy: = -3330.304011 Hartree

|    |             |             |             |
|----|-------------|-------------|-------------|
| As | 0.00035500  | 0.00075100  | -1.80285000 |
| C  | -0.70566900 | -4.21700600 | 0.39968300  |
| C  | -1.33182500 | -3.04278700 | 0.88285200  |
| C  | -1.13586900 | -1.81430100 | 0.25840900  |
| C  | -0.32960800 | -1.68619300 | -0.87852100 |
| C  | 0.27670900  | -2.85082500 | -1.36911100 |
| C  | 0.10111200  | -4.08731000 | -0.75714400 |
| H  | -1.97434100 | -3.08253000 | 1.75376600  |
| H  | -1.62810300 | -0.93869700 | 0.67080400  |
| H  | 0.90554100  | -2.79689800 | -2.25561500 |
| H  | 0.59119400  | -4.95238800 | -1.18603800 |
| C  | 1.62583900  | 0.55836700  | -0.87794500 |
| C  | 2.13955800  | -0.07577400 | 0.25913600  |

|   |             |             |             |
|---|-------------|-------------|-------------|
| C | 2.33155000  | 1.66561800  | -1.36843500 |
| C | 3.30162100  | 0.36831500  | 0.88351100  |
| H | 1.62696600  | -0.93948300 | 0.67179200  |
| C | 3.49033400  | 2.13142700  | -0.75650500 |
| H | 1.97070200  | 2.18323600  | -2.25504300 |
| C | 4.00594100  | 1.49730300  | 0.40020300  |
| H | 3.65699400  | -0.16833700 | 1.75450600  |
| H | 3.99475000  | 2.98811900  | -1.18561300 |
| C | -1.29585000 | 1.12922700  | -0.87815200 |
| C | -2.60845100 | 1.18311000  | -1.36688200 |
| C | -1.00321000 | 1.89449000  | 0.25663000  |
| C | -3.59197900 | 1.95272200  | -0.75488600 |
| H | -2.87645300 | 0.60921800  | -2.25178500 |
| C | -1.96967100 | 2.67783300  | 0.88105000  |
| H | 0.00182300  | 1.88560100  | 0.66759000  |
| C | -3.30046400 | 2.71922900  | 0.39988700  |
| H | -4.58691000 | 1.95799800  | -1.18214700 |
| H | -1.68252800 | 3.25656700  | 1.75025600  |
| N | 5.14512300  | 1.96696900  | 1.03564500  |
| N | -4.27743700 | 3.47017300  | 1.03528000  |
| N | -0.86781300 | -5.43839800 | 1.03530100  |
| C | 5.76750600  | 1.15282600  | 2.06970700  |
| H | 6.64494300  | 1.67254500  | 2.45547300  |
| H | 5.08325700  | 0.99389700  | 2.91027600  |
| H | 6.08512100  | 0.16630000  | 1.69933400  |
| C | 5.96135000  | 2.97641100  | 0.37666500  |
| H | 6.35306400  | 2.63821900  | -0.59469300 |
| H | 5.39010400  | 3.89596200  | 0.20916200  |
| H | 6.80648300  | 3.22842600  | 1.01780100  |
| C | -1.88357500 | -5.57060800 | 2.06981000  |
| H | -1.87130000 | -6.59015500 | 2.45602600  |
| H | -1.67924200 | -4.89800600 | 2.90996700  |
| H | -2.89704500 | -5.35333800 | 1.69972800  |
| C | -0.40129300 | -6.64984800 | 0.37637200  |
| H | -0.88974700 | -6.82002700 | -0.59511200 |
| H | 0.68072300  | -6.61462800 | 0.20913000  |



|   |             |             |             |
|---|-------------|-------------|-------------|
| H | -0.60559800 | -7.50785700 | 1.01739100  |
| C | -3.88417100 | 4.41821900  | 2.06773500  |
| H | -4.77358000 | 4.91649900  | 2.45433600  |
| H | -3.40199900 | 3.90705100  | 2.90809600  |
| H | -3.19092900 | 5.18776100  | 1.69554800  |
| C | -5.56096800 | 3.66878700  | 0.37755100  |
| H | -5.46585100 | 4.17417500  | -0.59551700 |
| H | -6.07093800 | 2.71321400  | 0.21371400  |
| H | -6.20143500 | 4.27617600  | 1.01763300  |

### (3) S<sub>N</sub>2-intial complex

Total energy: -6209.58803732 Hartree

Free energy: = -6209.063773 Hartree

|    |             |             |             |
|----|-------------|-------------|-------------|
| C  | 2.24946700  | 1.61644300  | -2.33991600 |
| As | 0.03101400  | 0.17091900  | -0.27341300 |
| H  | 1.34164400  | 1.91249300  | -2.85672500 |
| C  | -3.28137200 | 3.46190800  | 0.89935100  |
| C  | -3.07096700 | 3.03262500  | -0.43430000 |
| C  | -2.11008900 | 2.07343400  | -0.73206800 |
| C  | -1.30619700 | 1.49282000  | 0.25938700  |
| C  | -1.50604400 | 1.92318400  | 1.57444600  |
| C  | -2.45871800 | 2.88751000  | 1.89607000  |
| H  | -3.65746300 | 3.44711400  | -1.24475700 |
| H  | -1.98689700 | 1.77243400  | -1.77081500 |
| H  | -0.90492600 | 1.50554600  | 2.37691500  |
| H  | -2.56117700 | 3.18616500  | 2.93200000  |
| C  | 2.41568300  | 0.11251400  | -2.38022700 |
| O  | 3.27205900  | -0.29508400 | -1.43326200 |
| O  | 1.87348400  | -0.60240300 | -3.20049700 |
| C  | 3.55981600  | -1.72036600 | -1.35889800 |
| H  | 3.39066800  | -2.16320800 | -2.34204800 |
| H  | 4.62358500  | -1.77434800 | -1.11744600 |
| C  | 2.70908400  | -2.37883300 | -0.28744700 |
| H  | 2.92566900  | -3.45131300 | -0.26101300 |
| H  | 2.92036700  | -1.95222400 | 0.69484600  |

|    |             |             |             |
|----|-------------|-------------|-------------|
| H  | 1.64605800  | -2.24304900 | -0.49133200 |
| H  | 2.29258700  | 2.01300500  | -1.32992800 |
| Br | 3.76749900  | 2.44307600  | -3.33415100 |
| C  | -1.16735700 | -1.30200000 | -0.70140200 |
| C  | -2.37011600 | -1.53126200 | -0.01829900 |
| C  | -0.86522900 | -2.14539700 | -1.77944400 |
| C  | -3.21489400 | -2.58101700 | -0.35741100 |
| H  | -2.66128000 | -0.87104500 | 0.79403500  |
| C  | -1.69805200 | -3.20263600 | -2.13502000 |
| H  | 0.03831900  | -1.97641400 | -2.35932800 |
| C  | -2.89233300 | -3.46252900 | -1.42027400 |
| H  | -4.13283800 | -2.70934100 | 0.20259200  |
| H  | -1.41824600 | -3.81946500 | -2.97981300 |
| C  | 0.74247500  | -0.33261400 | 1.46373600  |
| C  | 0.29361500  | -1.41049500 | 2.23351800  |
| C  | 1.85340800  | 0.37886900  | 1.93653400  |
| C  | 0.91549400  | -1.76447200 | 3.42696300  |
| H  | -0.55012500 | -2.00382300 | 1.89471100  |
| C  | 2.48436000  | 0.04932500  | 3.13098100  |
| H  | 2.25356000  | 1.20319300  | 1.35059800  |
| C  | 2.02502600  | -1.03471100 | 3.91898400  |
| H  | 0.53324200  | -2.61655100 | 3.97511600  |
| H  | 3.34247600  | 0.63171100  | 3.44201900  |
| N  | -3.71106900 | -4.53031100 | -1.74410500 |
| N  | -4.25831700 | 4.39648100  | 1.21288100  |
| N  | 2.63234900  | -1.36308800 | 5.12028500  |
| C  | -4.89883700 | 5.13953500  | 0.13696100  |
| H  | -5.43353200 | 4.46620700  | -0.54159700 |
| H  | -5.63250600 | 5.82500100  | 0.56225300  |
| H  | -4.18349700 | 5.72564000  | -0.46004000 |
| C  | -4.27388000 | 4.98147300  | 2.54585400  |
| H  | -4.43176500 | 4.21279900  | 3.31004800  |
| H  | -3.34133600 | 5.51407800  | 2.78770900  |
| H  | -5.10090500 | 5.68849300  | 2.61747900  |
| C  | -5.02747500 | -4.63406900 | -1.13096900 |
| H  | -5.52076100 | -5.53675000 | -1.49205600 |

|   |             |             |             |
|---|-------------|-------------|-------------|
| H | -4.94901900 | -4.71478700 | -0.04127800 |
| H | -5.67166100 | -3.77265700 | -1.36261200 |
| C | -3.46137200 | -5.27526300 | -2.96977900 |
| H | -3.53417600 | -4.64616800 | -3.86951800 |
| H | -2.46592200 | -5.73253400 | -2.95627300 |
| H | -4.19150500 | -6.08034900 | -3.05511600 |
| C | 3.90532800  | -0.74542000 | 5.46435800  |
| H | 3.80610700  | 0.34265200  | 5.54135800  |
| H | 4.23090500  | -1.11416800 | 6.43735600  |
| H | 4.69501000  | -0.96385800 | 4.72957400  |
| C | 2.28566900  | -2.61885200 | 5.77084600  |
| H | 1.22256100  | -2.64516700 | 6.03314800  |
| H | 2.50285600  | -3.49593700 | 5.14259000  |
| H | 2.85396600  | -2.71127100 | 6.69669500  |

(4) T<sub>SN2</sub>

Total energy: -6209.57459652 Hartree

Free energy: = -6209.049413 Hartree

Imaginary frequency: 394.2 *icm*<sup>-1</sup>

|    |             |             |             |
|----|-------------|-------------|-------------|
| C  | 0.03266200  | -1.54446400 | 2.31405900  |
| As | -0.10954400 | -0.06061500 | 0.24694600  |
| H  | -0.93754400 | -1.17506900 | 2.60156900  |
| C  | -4.03078400 | -1.84643300 | -1.82054100 |
| C  | -4.08352500 | -1.12548600 | -0.59975300 |
| C  | -2.93074000 | -0.60274800 | -0.03063700 |
| C  | -1.67388900 | -0.76376500 | -0.63286100 |
| C  | -1.61487900 | -1.47797100 | -1.83443100 |
| C  | -2.75707200 | -2.01439500 | -2.41802000 |
| H  | -5.02703100 | -0.97156400 | -0.09191500 |
| H  | -3.01994400 | -0.04933100 | 0.90138900  |
| H  | -0.66104000 | -1.62715500 | -2.33143400 |
| H  | -2.65397000 | -2.56126000 | -3.34666000 |
| C  | 1.22062800  | -0.75320100 | 2.72123900  |
| O  | 2.33911600  | -1.23247500 | 2.14653400  |
| O  | 1.17263100  | 0.22051400  | 3.45262700  |

|    |             |             |             |
|----|-------------|-------------|-------------|
| C  | 3.53426000  | -0.42089200 | 2.30412500  |
| H  | 3.53971300  | 0.00420500  | 3.30971600  |
| H  | 4.36100600  | -1.12682500 | 2.20733000  |
| C  | 3.58704100  | 0.65996500  | 1.23454600  |
| H  | 4.42494800  | 1.33466300  | 1.43494700  |
| H  | 3.71543000  | 0.22332200  | 0.24283200  |
| H  | 2.66462600  | 1.24544500  | 1.23055700  |
| H  | 0.11142800  | -2.33737700 | 1.58939900  |
| Br | 0.10784300  | -3.10040000 | 4.12905400  |
| C  | -0.46763900 | 1.82821700  | 0.31135800  |
| C  | -1.22069500 | 2.45947000  | -0.68979000 |
| C  | -0.00321600 | 2.61032600  | 1.37825800  |
| C  | -1.47596800 | 3.82296800  | -0.65137600 |
| H  | -1.62350400 | 1.87748800  | -1.51339600 |
| C  | -0.24975200 | 3.97663600  | 1.43205100  |
| H  | 0.55941200  | 2.15107100  | 2.18540200  |
| C  | -0.98557600 | 4.62799100  | 0.40978600  |
| H  | -2.06307200 | 4.26201100  | -1.44800000 |
| H  | 0.12661600  | 4.53556700  | 2.27921600  |
| C  | 1.29539100  | -0.28726100 | -1.04395600 |
| C  | 1.75479700  | 0.76321300  | -1.84682300 |
| C  | 1.96129100  | -1.51840900 | -1.12644900 |
| C  | 2.82956600  | 0.59600700  | -2.71049000 |
| H  | 1.27754900  | 1.73682100  | -1.79334500 |
| C  | 3.03181600  | -1.70694800 | -1.99006200 |
| H  | 1.66020900  | -2.34711300 | -0.49243500 |
| C  | 3.49660800  | -0.65125400 | -2.81601500 |
| H  | 3.15104800  | 1.44214800  | -3.30421900 |
| H  | 3.51410900  | -2.67566100 | -2.01171400 |
| N  | -1.21754800 | 5.98445600  | 0.44502600  |
| N  | -5.17248900 | -2.35501400 | -2.40319000 |
| N  | 4.55114600  | -0.83125000 | -3.68467300 |
| C  | -6.43830400 | -2.29596500 | -1.68629900 |
| H  | -6.72876900 | -1.25966600 | -1.47816100 |
| H  | -7.22002300 | -2.74058200 | -2.30187200 |
| H  | -6.40335900 | -2.83824000 | -0.73056000 |

|   |             |             |             |
|---|-------------|-------------|-------------|
| C | -5.06364500 | -3.21595300 | -3.57195400 |
| H | -4.59257400 | -2.68959700 | -4.41028100 |
| H | -4.47843800 | -4.12434000 | -3.36886500 |
| H | -6.06153400 | -3.51735100 | -3.88984200 |
| C | -2.08516200 | 6.59901600  | -0.54970000 |
| H | -2.14054000 | 7.67135400  | -0.36414800 |
| H | -1.69262200 | 6.45597700  | -1.56332700 |
| H | -3.10595800 | 6.19277100  | -0.51926300 |
| C | -0.81097900 | 6.76022900  | 1.60818300  |
| H | -1.31179000 | 6.42554700  | 2.52749700  |
| H | 0.27160200  | 6.69735000  | 1.76898600  |
| H | -1.06161100 | 7.80823300  | 1.44606400  |
| C | 5.31988500  | -2.06756100 | -3.64002200 |
| H | 4.68765700  | -2.93492800 | -3.86099200 |
| H | 6.10403400  | -2.02950400 | -4.39583500 |
| H | 5.79278100  | -2.23038500 | -2.66094900 |
| C | 5.10592300  | 0.31394300  | -4.39296800 |
| H | 4.35103500  | 0.78821000  | -5.03013200 |
| H | 5.50293400  | 1.07714700  | -3.70827700 |
| H | 5.91766800  | -0.02235400 | -5.03761400 |

(5) S<sub>N</sub>2-product

Total energy: -6209.62463353 Hartree

Free energy: = -6209.098256 Hartree

|    |             |             |             |
|----|-------------|-------------|-------------|
| C  | 0.24999400  | 0.01168500  | -2.40153600 |
| As | -0.25396700 | -0.14729000 | -0.50804100 |
| H  | -0.45068200 | -0.61322200 | -2.95412700 |
| C  | -3.51177700 | 2.95047100  | 0.92403700  |
| C  | -3.68728800 | 2.18427800  | -0.25902700 |
| C  | -2.72178200 | 1.28002000  | -0.67126200 |
| C  | -1.54622600 | 1.09997500  | 0.06721600  |
| C  | -1.35559000 | 1.84856700  | 1.23221200  |
| C  | -2.31524000 | 2.75152200  | 1.66112300  |
| H  | -4.57863300 | 2.29846700  | -0.86170100 |
| H  | -2.89675600 | 0.71312700  | -1.58152200 |

|    |             |             |             |
|----|-------------|-------------|-------------|
| H  | -0.44290400 | 1.73828100  | 1.80870900  |
| H  | -2.12737800 | 3.31248400  | 2.56709200  |
| C  | 1.65333400  | -0.53137100 | -2.49830000 |
| O  | 2.55415900  | 0.44687500  | -2.40190400 |
| O  | 1.93182700  | -1.71646000 | -2.57211400 |
| C  | 3.93972900  | 0.04291400  | -2.23152700 |
| H  | 3.99970700  | -0.58560000 | -1.33769600 |
| H  | 4.24409400  | -0.55376200 | -3.09609200 |
| C  | 4.74969600  | 1.31408700  | -2.08714100 |
| H  | 5.80384700  | 1.06430100  | -1.93500800 |
| H  | 4.66423700  | 1.93476500  | -2.98324700 |
| H  | 4.39912700  | 1.89049200  | -1.22762300 |
| H  | 0.19222800  | 1.07421800  | -2.64508800 |
| Br | 0.55258900  | 3.35670900  | -1.46798800 |
| C  | -1.09013000 | -1.85154400 | -0.34223000 |
| C  | -2.06859700 | -2.03969700 | 0.64525700  |
| C  | -0.74337400 | -2.94363500 | -1.15115500 |
| C  | -2.69191700 | -3.26554300 | 0.81794900  |
| H  | -2.36148100 | -1.21344900 | 1.28579700  |
| C  | -1.35919000 | -4.17596200 | -0.99124000 |
| H  | 0.02519900  | -2.84290200 | -1.91061600 |
| C  | -2.35709800 | -4.37586000 | -0.00125200 |
| H  | -3.44479200 | -3.35804100 | 1.58982900  |
| H  | -1.06112600 | -4.98815200 | -1.64149400 |
| C  | 1.31898600  | -0.16982400 | 0.55903000  |
| C  | 1.70596100  | -1.37338100 | 1.16619100  |
| C  | 2.16305300  | 0.94642000  | 0.67094500  |
| C  | 2.89432200  | -1.46633600 | 1.87463700  |
| H  | 1.08162300  | -2.25665900 | 1.08158200  |
| C  | 3.34807500  | 0.86497400  | 1.38424600  |
| H  | 1.89431900  | 1.87984100  | 0.18271300  |
| C  | 3.75532200  | -0.34526000 | 2.00660600  |
| H  | 3.15584200  | -2.41715100 | 2.32019300  |
| H  | 3.96899600  | 1.74931900  | 1.44543800  |
| N  | -2.97227500 | -5.59126900 | 0.15781000  |
| N  | -4.46648700 | 3.84485400  | 1.34122800  |

|   |             |             |             |
|---|-------------|-------------|-------------|
| N | 4.93352200  | -0.42641900 | 2.70467400  |
| C | 5.85336900  | 0.70408700  | 2.71326100  |
| H | 5.39159500  | 1.59081300  | 3.16261800  |
| H | 6.73029800  | 0.44805400  | 3.30673200  |
| H | 6.18844000  | 0.96856400  | 1.70114100  |
| C | 5.37207600  | -1.70489500 | 3.24861300  |
| H | 4.64287100  | -2.10387800 | 3.96315800  |
| H | 5.52767400  | -2.45636700 | 2.46252000  |
| H | 6.31416600  | -1.56537000 | 3.77765000  |
| C | -3.99148200 | -5.76747800 | 1.18332700  |
| H | -4.35734400 | -6.79307800 | 1.15327500  |
| H | -3.59246100 | -5.57945700 | 2.18823400  |
| H | -4.84644000 | -5.09786400 | 1.02472200  |
| C | -2.61122100 | -6.71253400 | -0.69905900 |
| H | -2.80163400 | -6.49177200 | -1.75702800 |
| H | -1.55254700 | -6.98100000 | -0.59154600 |
| H | -3.20822100 | -7.58116500 | -0.42395200 |
| C | -4.21885500 | 4.68393900  | 2.50591500  |
| H | -5.08388100 | 5.32357400  | 2.67772400  |
| H | -4.06407400 | 4.07975600  | 3.40788300  |
| H | -3.33892500 | 5.32699300  | 2.37003800  |
| C | -5.64136500 | 4.09534300  | 0.51745500  |
| H | -5.37410300 | 4.48863800  | -0.47263000 |
| H | -6.23108300 | 3.18198100  | 0.37434900  |
| H | -6.27744200 | 4.82769300  | 1.01333900  |

(6) Cy<sub>2</sub>MeN

Total energy: -565.274314871 Hartree

Free energy: = -564.946655 Hartree

|   |             |            |             |
|---|-------------|------------|-------------|
| N | -0.02487800 | 0.74149200 | -0.57219800 |
| C | 0.13560200  | 2.19226700 | -0.48768100 |
| H | 0.13095800  | 2.59857600 | 0.53855900  |
| H | 1.08598900  | 2.47543300 | -0.94642800 |
| H | -0.65167500 | 2.69813700 | -1.05114400 |
| C | -1.24271700 | 0.19439500 | 0.07160600  |

|   |             |             |             |
|---|-------------|-------------|-------------|
| C | -2.44113400 | 1.16090400  | 0.04336200  |
| C | -1.65454200 | -1.12214000 | -0.62200900 |
| H | -1.04471500 | -0.02752800 | 1.13918900  |
| C | -3.68597100 | 0.53523000  | 0.69369000  |
| H | -2.66594800 | 1.42141100  | -1.00044100 |
| H | -2.20054500 | 2.09297700  | 0.56288200  |
| C | -2.89035800 | -1.76181700 | 0.02588900  |
| H | -1.86250900 | -0.89023800 | -1.67525200 |
| H | -0.82603500 | -1.83775300 | -0.61871000 |
| C | -4.07726100 | -0.79054500 | 0.02974800  |
| H | -4.51872500 | 1.24705400  | 0.65065700  |
| H | -3.48107600 | 0.35743300  | 1.75893500  |
| H | -3.15157200 | -2.68784600 | -0.49975700 |
| H | -2.65135500 | -2.04550300 | 1.06076900  |
| H | -4.93950300 | -1.23502800 | 0.54106000  |
| H | -4.38793300 | -0.59735900 | -1.00680800 |
| C | 1.19733100  | 0.00531800  | -0.17702100 |
| C | 2.25406100  | 0.01608800  | -1.29546400 |
| C | 1.82900900  | 0.44089300  | 1.16392800  |
| H | 0.89771500  | -1.04153800 | -0.05260700 |
| C | 3.45968400  | -0.86639700 | -0.93374300 |
| H | 2.60433000  | 1.04261000  | -1.46847000 |
| H | 1.78829100  | -0.32218400 | -2.22775000 |
| C | 3.02334000  | -0.45520200 | 1.52794600  |
| H | 2.17723300  | 1.47892700  | 1.08718400  |
| H | 1.07545000  | 0.41739900  | 1.96021300  |
| C | 4.07709900  | -0.45358300 | 0.41060000  |
| H | 4.21207100  | -0.82161100 | -1.73008900 |
| H | 3.13202700  | -1.91400100 | -0.87072500 |
| H | 3.46918400  | -0.12627100 | 2.47431500  |
| H | 2.66959400  | -1.48374100 | 1.68842700  |
| H | 4.90910300  | -1.11968600 | 0.66868400  |
| H | 4.49894100  | 0.55741100  | 0.31758900  |

(7) Base-adduct



Total energy: -6774.92341087 Hartree

Free energy: = -6774.039873 Hartree

|    |             |             |             |
|----|-------------|-------------|-------------|
| C  | 0.55505600  | 0.28771500  | -1.48669100 |
| As | 1.20875200  | -0.54203400 | 0.14560900  |
| C  | -2.42350300 | -3.19760500 | 1.62373800  |
| C  | -1.65023700 | -2.44454300 | 2.54824100  |
| C  | -0.56714500 | -1.68687700 | 2.13320600  |
| C  | -0.20860800 | -1.61482300 | 0.77974100  |
| C  | -0.96495800 | -2.35617400 | -0.14449300 |
| C  | -2.03506200 | -3.13217100 | 0.25839100  |
| H  | -1.90027500 | -2.44714500 | 3.60056600  |
| H  | -0.00220900 | -1.14133000 | 2.88160900  |
| H  | -0.73097900 | -2.32891700 | -1.20410000 |
| H  | -2.59830700 | -3.66104200 | -0.49774500 |
| C  | 1.53174200  | 1.28266400  | -2.04645300 |
| O  | 1.30493300  | 1.48809500  | -3.35001000 |
| O  | 2.40065100  | 1.84393800  | -1.39888400 |
| C  | 2.16991800  | 2.44516400  | -4.03241500 |
| H  | 1.59625900  | 2.73201400  | -4.91457600 |
| H  | 2.30420200  | 3.31791000  | -3.38993200 |
| C  | 3.49828700  | 1.80695700  | -4.40030600 |
| H  | 4.09170400  | 2.51104500  | -4.99141600 |
| H  | 4.06418000  | 1.54945700  | -3.50189600 |
| H  | 3.34034000  | 0.90259900  | -4.99430000 |
| Br | -5.42387800 | -1.10833900 | 1.09165000  |
| N  | -2.14255000 | 1.72211400  | -0.77933800 |
| C  | -2.40812700 | 1.19918400  | 0.56998000  |
| H  | -2.88614400 | 1.93775800  | 1.23148800  |
| H  | -3.06743300 | 0.33294700  | 0.54036800  |
| H  | -1.47373900 | 0.87368900  | 1.03073300  |
| H  | 0.38638000  | -0.52495600 | -2.19511900 |
| C  | -1.70683100 | 3.14355500  | -0.75176500 |
| C  | -0.54214700 | 3.30800500  | 0.24850600  |
| C  | -1.29422100 | 3.63618600  | -2.15427100 |
| H  | -2.53087700 | 3.79157900  | -0.39487900 |
| C  | 0.09572800  | 4.70158500  | 0.22912400  |

|   |             |             |             |
|---|-------------|-------------|-------------|
| H | 0.22737200  | 2.55765600  | 0.04081700  |
| H | -0.89652300 | 3.10719300  | 1.26160000  |
| C | -0.63639400 | 5.02460400  | -2.14246200 |
| H | -0.60351100 | 2.90708200  | -2.59274500 |
| H | -2.16553100 | 3.67352300  | -2.81431500 |
| C | 0.55287900  | 5.08892500  | -1.17905500 |
| H | 0.93492900  | 4.71897900  | 0.93475100  |
| H | -0.63378300 | 5.44162200  | 0.58764100  |
| H | -0.32669800 | 5.28453100  | -3.16165800 |
| H | -1.37955800 | 5.77611500  | -1.84056200 |
| H | 0.99736800  | 6.09123300  | -1.18222400 |
| H | 1.33447800  | 4.38907700  | -1.50466300 |
| C | -3.23002000 | 1.40581600  | -1.73961500 |
| C | -3.27196500 | -0.10161200 | -2.05144500 |
| C | -4.62378200 | 1.91737100  | -1.32061400 |
| H | -2.96465900 | 1.89730300  | -2.68072900 |
| C | -4.32772800 | -0.41367600 | -3.12375800 |
| H | -3.52466400 | -0.66815600 | -1.15013000 |
| H | -2.27838800 | -0.42694300 | -2.38232600 |
| C | -5.67864000 | 1.59204300  | -2.39071600 |
| H | -4.91594700 | 1.43124100  | -0.38264200 |
| H | -4.58690500 | 2.99928600  | -1.14129200 |
| C | -5.71369900 | 0.08591800  | -2.68986100 |
| H | -4.35327800 | -1.49387800 | -3.31403700 |
| H | -4.04587900 | 0.06619200  | -4.07317900 |
| H | -6.66556600 | 1.93887300  | -2.06028700 |
| H | -5.44637600 | 2.14222400  | -3.31519900 |
| H | -6.45996600 | -0.13330400 | -3.46401600 |
| H | -6.00913300 | -0.44858600 | -1.77795500 |
| C | 1.88312400  | 0.63187100  | 1.47761200  |
| C | 1.05859500  | 1.33186000  | 2.36898300  |
| C | 3.26876000  | 0.83889300  | 1.55392100  |
| C | 1.58687000  | 2.21349000  | 3.29826300  |
| H | -0.01530300 | 1.19504100  | 2.34917600  |
| C | 3.81261800  | 1.71845400  | 2.47440500  |
| H | 3.93889600  | 0.31261700  | 0.88294200  |

|   |             |             |             |
|---|-------------|-------------|-------------|
| C | 2.98592500  | 2.44276600  | 3.37495300  |
| H | 0.90505500  | 2.72690200  | 3.96295700  |
| H | 4.88704500  | 1.84545800  | 2.49224700  |
| C | 2.60793200  | -1.71881700 | -0.39203200 |
| C | 3.57271000  | -1.36357000 | -1.34658200 |
| C | 2.68588700  | -2.99767100 | 0.17797300  |
| C | 4.57553200  | -2.24454000 | -1.72119900 |
| H | 3.56511000  | -0.38034400 | -1.80292600 |
| C | 3.68026700  | -3.89214100 | -0.18573800 |
| H | 1.95206600  | -3.31047100 | 0.91460900  |
| C | 4.65949300  | -3.54287000 | -1.15255100 |
| H | 5.29458400  | -1.92063200 | -2.46215200 |
| H | 3.69160700  | -4.86828400 | 0.28117600  |
| N | -3.47341600 | -3.97696100 | 2.03191900  |
| N | 3.51586600  | 3.32019600  | 4.28272900  |
| N | 5.64465800  | -4.42152300 | -1.52108800 |
| C | 4.95215600  | 3.56523900  | 4.31261100  |
| H | 5.17620000  | 4.28728800  | 5.09671800  |
| H | 5.51164900  | 2.64718900  | 4.52945300  |
| H | 5.31605400  | 3.97194300  | 3.36020500  |
| C | 2.63742100  | 4.08704200  | 5.15711200  |
| H | 1.94979800  | 4.72356200  | 4.58526900  |
| H | 2.04067700  | 3.43132300  | 5.80265900  |
| H | 3.24054700  | 4.72923200  | 5.79753500  |
| C | -4.05913300 | -3.73724900 | 3.34899900  |
| H | -4.46598800 | -2.72017200 | 3.41225800  |
| H | -4.86986200 | -4.44866700 | 3.50807300  |
| H | -3.32345700 | -3.89700300 | 4.14290900  |
| C | -4.34656100 | -4.57795300 | 1.02532700  |
| H | -4.87618600 | -3.80270600 | 0.45760000  |
| H | -3.77304100 | -5.21791900 | 0.34799900  |
| H | -5.07890100 | -5.20934800 | 1.52976300  |
| C | 5.70495500  | -5.74764800 | -0.92067100 |
| H | 6.54997600  | -6.29287100 | -1.33912000 |
| H | 5.84114300  | -5.69395100 | 0.16685100  |
| H | 4.79455700  | -6.32589700 | -1.12326300 |

|   |             |             |             |
|---|-------------|-------------|-------------|
| C | 6.63381500  | -4.03641700 | -2.51887400 |
| H | 6.16588900  | -3.79809300 | -3.48248400 |
| H | 7.21620100  | -3.16402000 | -2.19633900 |
| H | 7.32557600  | -4.86297900 | -2.67610900 |
| H | -0.42588800 | 0.76816800  | -1.26404100 |

(8) TS<sub>deprotonate</sub>

Total energy: -6774.91164418 Hartree

Free energy: = -6774.031384 Hartree

Imaginary frequency: 1410.7  $\text{icm}^{-1}$

|    |             |             |             |
|----|-------------|-------------|-------------|
| C  | -0.37273400 | -0.23658900 | -1.44190400 |
| As | -1.04375000 | 0.58998600  | 0.14427300  |
| C  | 2.59233800  | 3.30666000  | 1.55352400  |
| C  | 1.75881100  | 2.66662000  | 2.50727300  |
| C  | 0.66238600  | 1.91175700  | 2.11784000  |
| C  | 0.34598400  | 1.73480500  | 0.76412800  |
| C  | 1.12963800  | 2.41311100  | -0.18312700 |
| C  | 2.21544600  | 3.18439900  | 0.19144200  |
| H  | 1.97718700  | 2.74424900  | 3.56401200  |
| H  | 0.05836400  | 1.45164700  | 2.89187200  |
| H  | 0.91325200  | 2.33131900  | -1.24296400 |
| H  | 2.80263900  | 3.65337500  | -0.58588100 |
| C  | -1.40555800 | -1.03294500 | -2.10887100 |
| O  | -1.19729100 | -1.09682200 | -3.45113600 |
| O  | -2.32855700 | -1.62596200 | -1.55488800 |
| C  | -2.16358000 | -1.85722800 | -4.22136800 |
| H  | -1.63808400 | -2.10452900 | -5.14587600 |
| H  | -2.40184800 | -2.77996200 | -3.68681900 |
| C  | -3.41209700 | -1.03054800 | -4.48722800 |
| H  | -4.11055600 | -1.59640900 | -5.11165800 |
| H  | -3.90893800 | -0.78125400 | -3.54657000 |
| H  | -3.15583700 | -0.10309400 | -5.00794200 |
| Br | 5.33110800  | 0.86947100  | 1.07120500  |
| N  | 1.87372100  | -1.68175000 | -0.80537800 |
| C  | 2.20354400  | -1.19336700 | 0.55911000  |

|   |             |             |             |
|---|-------------|-------------|-------------|
| H | 2.61801600  | -1.99110800 | 1.18050500  |
| H | 2.92838900  | -0.38231600 | 0.52943900  |
| H | 1.29406800  | -0.81349800 | 1.01752800  |
| H | 0.01653600  | 0.54432200  | -2.09408600 |
| C | 1.38733700  | -3.11521400 | -0.77565800 |
| C | 0.20570200  | -3.22656800 | 0.21062900  |
| C | 1.01227600  | -3.60557600 | -2.18730800 |
| H | 2.20655500  | -3.74277700 | -0.39731200 |
| C | -0.48331000 | -4.59547800 | 0.17499800  |
| H | -0.53099900 | -2.45353800 | -0.01133500 |
| H | 0.55336400  | -3.03604600 | 1.22800900  |
| C | 0.29977600  | -4.96716300 | -2.17140800 |
| H | 0.36783900  | -2.86497200 | -2.67190200 |
| H | 1.91089400  | -3.69150900 | -2.80475200 |
| C | -0.92017900 | -4.96269800 | -1.24542400 |
| H | -1.34039500 | -4.57311900 | 0.85784400  |
| H | 0.20396600  | -5.36546200 | 0.55340200  |
| H | 0.01337400  | -5.22882500 | -3.19637400 |
| H | 1.00340100  | -5.74149600 | -1.83490700 |
| H | -1.41423900 | -5.94117700 | -1.25823200 |
| H | -1.64953600 | -4.22162100 | -1.59848800 |
| C | 2.97695000  | -1.40715000 | -1.79536200 |
| C | 3.14671700  | 0.10110000  | -2.04772700 |
| C | 4.31105900  | -2.05846500 | -1.39513000 |
| H | 2.64180200  | -1.84329700 | -2.73964600 |
| C | 4.22702000  | 0.34766600  | -3.11389400 |
| H | 3.44773400  | 0.61435600  | -1.12984400 |
| H | 2.19583500  | 0.52855000  | -2.37756000 |
| C | 5.38978400  | -1.79267100 | -2.45809800 |
| H | 4.64586100  | -1.63036600 | -0.44342900 |
| H | 4.18049600  | -3.13767700 | -1.25498300 |
| C | 5.56265300  | -0.28732900 | -2.70401800 |
| H | 4.34512700  | 1.42727300  | -3.26399800 |
| H | 3.89956000  | -0.07080200 | -4.07705200 |
| H | 6.33718500  | -2.24139200 | -2.13742600 |
| H | 5.10847800  | -2.28888700 | -3.39866500 |

|   |             |             |             |
|---|-------------|-------------|-------------|
| H | 6.32278800  | -0.11123400 | -3.47489600 |
| H | 5.90653200  | 0.18772900  | -1.77663900 |
| C | -1.67581000 | -0.58930400 | 1.50425800  |
| C | -0.90492900 | -1.05941900 | 2.57588300  |
| C | -2.98188200 | -1.08412900 | 1.36057900  |
| C | -1.41096200 | -1.98531400 | 3.47595300  |
| H | 0.11597500  | -0.72579900 | 2.71525100  |
| C | -3.50096800 | -2.00946000 | 2.25001200  |
| H | -3.59223600 | -0.75584300 | 0.52813200  |
| C | -2.72905900 | -2.49300700 | 3.34013600  |
| H | -0.77138800 | -2.31827100 | 4.28251700  |
| H | -4.51047400 | -2.36533700 | 2.09119300  |
| C | -2.55255500 | 1.67856400  | -0.30210500 |
| C | -2.97141700 | 1.87204600  | -1.62231300 |
| C | -3.24943500 | 2.34387500  | 0.71630900  |
| C | -4.05250500 | 2.68865700  | -1.92575200 |
| H | -2.45764100 | 1.37997400  | -2.44213400 |
| C | -4.33184100 | 3.16243300  | 0.43546900  |
| H | -2.95329400 | 2.21580500  | 1.75408500  |
| C | -4.76867400 | 3.36008200  | -0.90178900 |
| H | -4.33971200 | 2.80038700  | -2.96313900 |
| H | -4.83941300 | 3.65042800  | 1.25739400  |
| N | 3.69479700  | 4.03519200  | 1.93370400  |
| N | -3.23687900 | -3.41015200 | 4.22472500  |
| N | -5.84109900 | 4.16706700  | -1.18974600 |
| C | -4.54712200 | -4.00233900 | 3.98697200  |
| H | -4.77732400 | -4.69783900 | 4.79319800  |
| H | -5.33195000 | -3.23754700 | 3.97071500  |
| H | -4.58461300 | -4.55264600 | 3.03697800  |
| C | -2.37996300 | -3.97383700 | 5.26004500  |
| H | -1.52153900 | -4.51263700 | 4.83620900  |
| H | -1.99818100 | -3.19340100 | 5.92812500  |
| H | -2.95831500 | -4.67343600 | 5.86243600  |
| C | 4.27055000  | 3.78318100  | 3.25387500  |
| H | 4.59228100  | 2.73740900  | 3.34481800  |
| H | 5.13764400  | 4.43059700  | 3.38911800  |

|   |             |             |             |
|---|-------------|-------------|-------------|
| H | 3.55843800  | 4.02350000  | 4.04859700  |
| C | 4.62861800  | 4.48328300  | 0.90150600  |
| H | 5.09144000  | 3.62704100  | 0.39397100  |
| H | 4.12201200  | 5.12264500  | 0.17255200  |
| H | 5.40927800  | 5.08245400  | 1.37226400  |
| C | -6.55677500 | 4.84450900  | -0.11764100 |
| H | -7.36822400 | 5.43323500  | -0.54388900 |
| H | -6.99332000 | 4.13123200  | 0.59327700  |
| H | -5.90187600 | 5.52535800  | 0.44111500  |
| C | -6.26745100 | 4.35071300  | -2.56981000 |
| H | -5.47425300 | 4.79623700  | -3.18394100 |
| H | -6.56362700 | 3.40061300  | -3.03286200 |
| H | -7.12725200 | 5.01918700  | -2.59423500 |
| H | 0.79002300  | -0.98705300 | -1.13730100 |

(9) H-Base product

Total energy: -6774.91730832 Hartree

Free energy: = -6774.032388 Hartree

|    |             |             |             |
|----|-------------|-------------|-------------|
| C  | 0.49032500  | 0.22840600  | -1.52593100 |
| As | 1.09849400  | -0.63133600 | 0.02371600  |
| C  | -2.47498300 | -3.55606000 | 1.19708300  |
| C  | -1.57963900 | -3.06914100 | 2.18377200  |
| C  | -0.50413300 | -2.25950000 | 1.84770600  |
| C  | -0.27164300 | -1.86459800 | 0.52212900  |
| C  | -1.12502600 | -2.38505300 | -0.46368900 |
| C  | -2.18684800 | -3.21487800 | -0.14760900 |
| H  | -1.72908900 | -3.31487500 | 3.22696500  |
| H  | 0.15150400  | -1.92824900 | 2.64581800  |
| H  | -0.98205300 | -2.13250400 | -1.50782200 |
| H  | -2.82777800 | -3.55246100 | -0.95016600 |
| C  | 1.43732000  | 1.11905300  | -2.11980100 |
| O  | 1.15937200  | 1.35473000  | -3.44782800 |
| O  | 2.37838000  | 1.68844100  | -1.55073800 |
| C  | 2.09214600  | 2.19763200  | -4.15748100 |
| H  | 1.53743100  | 2.54668000  | -5.03197200 |

|    |             |             |             |
|----|-------------|-------------|-------------|
| H  | 2.35315900  | 3.05883800  | -3.53685200 |
| C  | 3.33531200  | 1.41757200  | -4.56125100 |
| H  | 4.00999600  | 2.05267900  | -5.14452100 |
| H  | 3.86469400  | 1.07069800  | -3.67050500 |
| H  | 3.06377800  | 0.54989900  | -5.17026200 |
| H  | -1.13313200 | 1.14197700  | -1.10666900 |
| Br | -5.21831500 | -1.10232000 | 1.03788100  |
| N  | -1.97120500 | 1.69005600  | -0.73398400 |
| C  | -2.23961800 | 1.08736400  | 0.61390700  |
| H  | -2.63844100 | 1.84333900  | 1.28864500  |
| H  | -2.95427400 | 0.26921700  | 0.54382100  |
| H  | -1.29847200 | 0.70190600  | 0.98760100  |
| H  | -0.01370100 | -0.44565400 | -2.21040000 |
| C  | -1.45159400 | 3.13054900  | -0.62760700 |
| C  | -0.25474600 | 3.15442600  | 0.34075000  |
| C  | -1.08422100 | 3.67076000  | -2.02084700 |
| H  | -2.27234700 | 3.72089600  | -0.20717100 |
| C  | 0.45710500  | 4.51225500  | 0.36983800  |
| H  | 0.45934700  | 2.38470500  | 0.04431100  |
| H  | -0.58148200 | 2.90633400  | 1.35234200  |
| C  | -0.34035600 | 5.01480000  | -1.94762800 |
| H  | -0.45652200 | 2.93673400  | -2.53719300 |
| H  | -1.98537700 | 3.80612600  | -2.62498100 |
| C  | 0.88730400  | 4.94112700  | -1.03482500 |
| H  | 1.32021400  | 4.43234600  | 1.03981400  |
| H  | -0.21080000 | 5.27310500  | 0.79781300  |
| H  | -0.05760300 | 5.31261800  | -2.96333200 |
| H  | -1.02405600 | 5.78857500  | -1.57172200 |
| H  | 1.39810200  | 5.91036300  | -1.00462400 |
| H  | 1.59900800  | 4.20347300  | -1.42768100 |
| C  | -3.13127900 | 1.48914400  | -1.70286300 |
| C  | -3.25547300 | 0.01070600  | -2.09853500 |
| C  | -4.44479800 | 2.05186200  | -1.14887900 |
| H  | -2.85382000 | 2.04220700  | -2.60167300 |
| C  | -4.39129300 | -0.16332700 | -3.12061800 |
| H  | -3.48237700 | -0.60468600 | -1.22304500 |



|   |             |             |             |
|---|-------------|-------------|-------------|
| H | -2.30749300 | -0.33385800 | -2.52386900 |
| C | -5.57442900 | 1.85744700  | -2.17550300 |
| H | -4.71389600 | 1.51479600  | -0.23292300 |
| H | -4.33511800 | 3.11463400  | -0.90588300 |
| C | -5.71604300 | 0.37948200  | -2.56691700 |
| H | -4.48544000 | -1.22562200 | -3.37237800 |
| H | -4.13524200 | 0.36162900  | -4.05219100 |
| H | -6.51226300 | 2.23536100  | -1.75363200 |
| H | -5.36525400 | 2.45927300  | -3.07160000 |
| H | -6.51652300 | 0.25749200  | -3.30611000 |
| H | -5.98740200 | -0.19969600 | -1.67549900 |
| C | 1.56405300  | 0.49967600  | 1.49884000  |
| C | 0.74737400  | 0.74205200  | 2.61054000  |
| C | 2.78365300  | 1.18912300  | 1.41169100  |
| C | 1.11761700  | 1.64879200  | 3.59441900  |
| H | -0.20611900 | 0.23978900  | 2.72111100  |
| C | 3.16688200  | 2.09739300  | 2.38496700  |
| H | 3.42419900  | 1.03304500  | 0.55285700  |
| C | 2.34165200  | 2.35984600  | 3.51040900  |
| H | 0.44581900  | 1.80297300  | 4.42848400  |
| H | 4.11173000  | 2.61142200  | 2.26525700  |
| C | 2.72262300  | -1.59332000 | -0.33111200 |
| C | 3.18307700  | -1.76683000 | -1.63979800 |
| C | 3.47286100  | -2.15162700 | 0.71145800  |
| C | 4.34853100  | -2.47163500 | -1.91037300 |
| H | 2.62918900  | -1.33922000 | -2.47055700 |
| C | 4.63969200  | -2.85991900 | 0.46423400  |
| H | 3.15510000  | -2.02247600 | 1.74267600  |
| C | 5.11127100  | -3.04654500 | -0.86189100 |
| H | 4.66725000  | -2.56861700 | -2.94017000 |
| H | 5.18808500  | -3.26548600 | 1.30471400  |
| N | -3.55346300 | -4.34612700 | 1.52724700  |
| N | 2.71561400  | 3.26058000  | 4.47816500  |
| N | 6.26163400  | -3.75522600 | -1.11857400 |
| C | 3.89990600  | 4.08611600  | 4.27985900  |
| H | 4.03194900  | 4.73676900  | 5.14375100  |

|   |             |             |             |
|---|-------------|-------------|-------------|
| H | 4.80157700  | 3.47059300  | 4.18539900  |
| H | 3.81986900  | 4.71618600  | 3.38298700  |
| C | 1.78348100  | 3.60792200  | 5.54278400  |
| H | 0.85861100  | 4.05667100  | 5.15407700  |
| H | 1.51272700  | 2.72667200  | 6.13508400  |
| H | 2.25598600  | 4.32503100  | 6.21328000  |
| C | -4.08598800 | -4.25634800 | 2.88622400  |
| H | -4.42533500 | -3.23517500 | 3.10543400  |
| H | -4.93422700 | -4.93593800 | 2.97753200  |
| H | -3.34232700 | -4.56563000 | 3.62581500  |
| C | -4.52305500 | -4.67682000 | 0.48412100  |
| H | -5.02602200 | -3.77515300 | 0.11132100  |
| H | -4.03399100 | -5.19966100 | -0.34318100 |
| H | -5.26890000 | -5.35452200 | 0.90234700  |
| C | 7.07036800  | -4.25669000 | -0.01672400 |
| H | 7.92769900  | -4.79661000 | -0.41755800 |
| H | 7.44545300  | -3.44630800 | 0.62351100  |
| H | 6.50177900  | -4.95176600 | 0.61273000  |
| C | 6.77245200  | -3.84520000 | -2.47893500 |
| H | 6.04994000  | -4.33028500 | -3.14640300 |
| H | 7.01171800  | -2.85748400 | -2.89654100 |
| H | 7.68255200  | -4.44423000 | -2.48181000 |

(10) arsonium ylide

Total energy: -3637.23331986 Hartree

Free energy: = -3636.718835 Hartree

|    |             |             |             |
|----|-------------|-------------|-------------|
| C  | -0.41873000 | -0.25655800 | 2.51116600  |
| As | 0.06756100  | -0.05926400 | 0.75651900  |
| C  | 4.25051000  | -2.20876500 | 0.07880600  |
| C  | 3.16684100  | -2.40357700 | -0.81489000 |
| C  | 1.94631800  | -1.77568100 | -0.60408000 |
| C  | 1.73771600  | -0.93591000 | 0.49603100  |
| C  | 2.80405200  | -0.73602300 | 1.38439700  |
| C  | 4.03005400  | -1.35658200 | 1.19246100  |
| H  | 3.27446900  | -3.04889500 | -1.67717400 |

|   |             |             |             |
|---|-------------|-------------|-------------|
| H | 1.14161500  | -1.95222400 | -1.31173100 |
| H | 2.67782300  | -0.08959500 | 2.24860000  |
| H | 4.81881900  | -1.17620400 | 1.91131400  |
| C | -1.70364500 | 0.18068100  | 2.86417900  |
| O | -2.02361700 | -0.09576500 | 4.18433000  |
| O | -2.52488100 | 0.75318900  | 2.11614800  |
| C | -3.36133800 | 0.23277800  | 4.59141000  |
| H | -3.31442500 | 0.30671800  | 5.68213300  |
| H | -3.64353500 | 1.20782900  | 4.18314000  |
| C | -4.35645100 | -0.83612300 | 4.15694700  |
| H | -5.35962600 | -0.60044500 | 4.52850400  |
| H | -4.38987300 | -0.88681400 | 3.06597400  |
| H | -4.06455600 | -1.81627200 | 4.54710300  |
| H | 0.24454500  | -0.75173100 | 3.20529700  |
| C | 0.30515600  | 1.72975000  | 0.09396000  |
| C | 1.39529500  | 2.05027800  | -0.72340600 |
| C | -0.63566700 | 2.73141500  | 0.37540400  |
| C | 1.56056900  | 3.33214800  | -1.23478500 |
| H | 2.13968600  | 1.29580700  | -0.96032500 |
| C | -0.48218800 | 4.01631200  | -0.12691900 |
| H | -1.49073900 | 2.49639000  | 1.00183600  |
| C | 0.61929600  | 4.35449300  | -0.95552400 |
| H | 2.42529500  | 3.53479800  | -1.85373200 |
| H | -1.22680800 | 4.76084700  | 0.12487600  |
| C | -1.20214200 | -0.84859700 | -0.43353400 |
| C | -1.87738500 | -2.01014700 | -0.04251500 |
| C | -1.46332000 | -0.31712400 | -1.69975800 |
| C | -2.79160400 | -2.62748500 | -0.88353300 |
| H | -1.69755200 | -2.41863300 | 0.94859600  |
| C | -2.37158800 | -0.92439200 | -2.55831000 |
| H | -0.95996100 | 0.58914300  | -2.02333700 |
| C | -3.05922800 | -2.10455700 | -2.17608900 |
| H | -3.30184300 | -3.51573400 | -0.53364300 |
| H | -2.55093900 | -0.47321800 | -3.52577300 |
| N | 5.46693400  | -2.81661300 | -0.12605600 |
| N | 0.76439700  | 5.62403600  | -1.47209400 |

|   |             |             |             |
|---|-------------|-------------|-------------|
| N | -3.95103600 | -2.72147300 | -3.02620500 |
| C | -0.14430700 | 6.68373500  | -1.05880700 |
| H | 0.12333600  | 7.60643900  | -1.57326100 |
| H | -1.18117400 | 6.44436800  | -1.32241000 |
| H | -0.10314300 | 6.86988200  | 0.02378200  |
| C | 1.97132000  | 5.97301000  | -2.20692700 |
| H | 2.87803800  | 5.86478400  | -1.59475800 |
| H | 2.08882300  | 5.34763700  | -3.09986000 |
| H | 1.90450400  | 7.00994000  | -2.53543500 |
| C | 5.63868200  | -3.74661000 | -1.23274000 |
| H | 5.45893000  | -3.25837700 | -2.19840800 |
| H | 6.66260200  | -4.11908100 | -1.23345300 |
| H | 4.96178700  | -4.60856000 | -1.15614300 |
| C | 6.53425400  | -2.66155300 | 0.85184200  |
| H | 6.82017300  | -1.60922900 | 0.97006800  |
| H | 6.24915900  | -3.04984800 | 1.83920300  |
| H | 7.41336400  | -3.20914700 | 0.51357900  |
| C | -4.30303200 | -2.08955400 | -4.28946900 |
| H | -5.00847500 | -2.72498700 | -4.82437500 |
| H | -4.76823400 | -1.10373100 | -4.14740700 |
| H | -3.42147200 | -1.95972100 | -4.92817800 |
| C | -4.74439700 | -3.84680400 | -2.55288800 |
| H | -4.10537900 | -4.68303400 | -2.24585100 |
| H | -5.38404500 | -3.57662700 | -1.70079900 |
| H | -5.38504000 | -4.19915100 | -3.36098600 |

(11) Br·HNCy<sub>2</sub>Me

Total energy: -3137.63060367 Hartree

Free energy: = -3137.290010 Hartree

|    |             |             |             |
|----|-------------|-------------|-------------|
| Br | -3.54925700 | -1.37689800 | -0.09007700 |
| N  | 0.82534600  | -0.34163400 | -0.43012400 |
| C  | 0.14399600  | -1.63207900 | -0.06018700 |
| H  | 0.20804700  | -1.76671300 | 1.01756000  |
| H  | -0.90730900 | -1.59010000 | -0.35396500 |
| H  | 0.64817800  | -2.44964500 | -0.57071600 |

|   |             |             |             |
|---|-------------|-------------|-------------|
| H | 0.91105100  | -0.35135300 | -1.45084000 |
| C | 2.25930000  | -0.19499700 | 0.11064000  |
| C | 3.00809100  | -1.53017300 | 0.20676700  |
| C | 3.03328400  | 0.78949300  | -0.77994900 |
| H | 2.13559800  | 0.21837100  | 1.11658400  |
| C | 4.42954600  | -1.29931700 | 0.75205700  |
| H | 3.06743500  | -1.98888400 | -0.78884200 |
| H | 2.48461500  | -2.22863400 | 0.86293700  |
| C | 4.45259900  | 1.01991900  | -0.23716500 |
| H | 3.09690600  | 0.36543200  | -1.79190000 |
| H | 2.51119800  | 1.74649700  | -0.86434900 |
| C | 5.21817100  | -0.30159300 | -0.10376100 |
| H | 4.94906900  | -2.26149000 | 0.80443200  |
| H | 4.35933500  | -0.92235900 | 1.78127800  |
| H | 4.98210700  | 1.71195300  | -0.89984700 |
| H | 4.38670700  | 1.50840400  | 0.74404000  |
| H | 6.20697500  | -0.12574700 | 0.33333400  |
| H | 5.38208100  | -0.72858000 | -1.10244900 |
| C | -0.03382000 | 0.90110800  | -0.10340600 |
| C | -1.03487400 | 1.15686300  | -1.23351500 |
| C | -0.70951200 | 0.80022600  | 1.26643300  |
| H | 0.67978000  | 1.72813900  | -0.08007100 |
| C | -1.82485200 | 2.44522000  | -0.94111300 |
| H | -1.73850000 | 0.32042000  | -1.30317400 |
| H | -0.50122300 | 1.25002100  | -2.18847700 |
| C | -1.47982600 | 2.10501900  | 1.54135900  |
| H | -1.42786200 | -0.02510800 | 1.26612400  |
| H | 0.03275400  | 0.62074400  | 2.05271200  |
| C | -2.50761500 | 2.37518500  | 0.43260300  |
| H | -2.56653000 | 2.59657300  | -1.73255700 |
| H | -1.14469500 | 3.30819600  | -0.97356400 |
| H | -1.97575700 | 2.02621800  | 2.51458000  |
| H | -0.77523000 | 2.94589600  | 1.61094000  |
| H | -3.04661200 | 3.30788200  | 0.63452000  |
| H | -3.23846400 | 1.55747400  | 0.42069100  |

[B] S<sub>N</sub>2 reaction between ethyl bromoacetate and 1-phenylarslane (**1**) to form an arsonium salt, and the deprotonation of the resultant arsonium salt by the sodium acetate base to form an arsonium ylide. Their total energies were obtained at the B3LYP-D3 calculations using the polarizable continuum model to include solvent effects of toluene. Their free energies were also obtained at 25 °C.  
(Scheme S1 & Figure S29)

(1) ethyl bromoacetate

Total energy: -2878.82757761 Hartree

Free energy: = -2878.753224 Hartree

|    |             |             |             |
|----|-------------|-------------|-------------|
| C  | -0.63465800 | 0.86563500  | 0.72787500  |
| H  | -0.56092600 | 0.56600400  | 1.77231300  |
| C  | 0.68352200  | 0.68099900  | 0.00501000  |
| O  | 1.18892400  | -0.54081900 | 0.22408600  |
| O  | 1.20399400  | 1.54645500  | -0.66751300 |
| C  | 2.45315800  | -0.84993900 | -0.42642900 |
| H  | 2.46771300  | -1.94020900 | -0.47407900 |
| H  | 2.43411100  | -0.44283200 | -1.44039300 |
| C  | 3.62428700  | -0.30196300 | 0.37197300  |
| H  | 4.56513000  | -0.60662000 | -0.09688200 |
| H  | 3.58886100  | 0.78949300  | 0.40011900  |
| H  | 3.60741100  | -0.68622500 | 1.39574300  |
| H  | -0.97321300 | 1.89245300  | 0.62222400  |
| Br | -2.02943700 | -0.28530100 | -0.07720600 |

(2) 1-phenylarslane (**1**)

Total energy: -2622.70460450 Hartree

Free energy: = -2622.538101 Hartree

|    |             |             |             |
|----|-------------|-------------|-------------|
| As | 0.93331800  | -0.63120800 | -0.78173500 |
| C  | 1.79621200  | 1.15702500  | -0.71584000 |
| C  | 1.61275800  | -0.97255200 | 1.07912900  |
| C  | -3.58001300 | 0.36174200  | 0.43820900  |
| C  | -2.78259000 | 1.38218300  | -0.08163900 |
| C  | -1.45334000 | 1.12898500  | -0.43084900 |
| C  | -0.89677000 | -0.14486700 | -0.26505500 |

|   |             |             |             |
|---|-------------|-------------|-------------|
| C | -1.71587700 | -1.16546300 | 0.24305800  |
| C | -3.04133700 | -0.91721200 | 0.59961900  |
| H | -4.61251500 | 0.55890300  | 0.71113400  |
| H | -3.19240300 | 2.37986600  | -0.21293600 |
| H | -0.85599200 | 1.94295300  | -0.82948800 |
| H | -1.30911300 | -2.16709100 | 0.36671700  |
| H | -3.65356200 | -1.72129200 | 0.99828900  |
| C | 2.48903100  | 0.23498400  | 1.46646000  |
| C | 1.95001100  | 1.49560100  | 0.77099600  |
| H | 2.16577000  | -1.91374500 | 1.09489100  |
| H | 0.74019800  | -1.07079600 | 1.72876100  |
| H | 3.51934500  | 0.06129400  | 1.12997200  |
| H | 2.52706700  | 0.36328600  | 2.55456000  |
| H | 2.61677100  | 2.35241900  | 0.92879000  |
| H | 0.97059300  | 1.75836200  | 1.18963800  |
| H | 2.77527300  | 1.02801400  | -1.18934100 |
| H | 1.24056500  | 1.89513300  | -1.29824500 |

### (3) S<sub>N</sub>2-initial complex

Total energy: -5501.55147535 Hartree

Free energy: = -5501.292047 Hartree

|    |             |             |             |
|----|-------------|-------------|-------------|
| C  | -2.16074300 | -1.22376000 | 0.07637100  |
| As | 1.14008800  | -0.23840100 | -0.07107100 |
| H  | -1.62178200 | -1.86085800 | -0.61778700 |
| C  | 0.90494300  | 1.52165500  | 0.81565200  |
| C  | 1.31904300  | 0.69415300  | -1.83141000 |
| C  | 5.80240800  | -1.09978600 | 0.56524500  |
| C  | 5.16868700  | -0.17653500 | 1.39750900  |
| C  | 3.80992400  | 0.10437300  | 1.23140200  |
| C  | 3.05756500  | -0.53093300 | 0.23657600  |
| C  | 3.70748900  | -1.46557600 | -0.58528200 |
| C  | 5.06515800  | -1.74558900 | -0.43009800 |
| H  | 6.85886100  | -1.31716000 | 0.69192600  |
| H  | 5.73177800  | 0.33237800  | 2.17496000  |
| H  | 3.34859600  | 0.83198000  | 1.89159900  |

|    |             |             |             |
|----|-------------|-------------|-------------|
| H  | 3.14755900  | -1.98060500 | -1.36335100 |
| H  | 5.54535300  | -2.46889200 | -1.08314000 |
| C  | -2.19465600 | 0.19678400  | -0.44356200 |
| O  | -2.67541600 | 1.04323200  | 0.47726400  |
| O  | -1.82394700 | 0.52279200  | -1.55303200 |
| C  | -2.84487100 | 2.42533400  | 0.05876500  |
| H  | -1.86837700 | 2.82877900  | -0.22412200 |
| H  | -3.48648000 | 2.44164900  | -0.82705700 |
| C  | 1.04168500  | 2.18726700  | -1.57085800 |
| C  | 1.50316700  | 2.55283800  | -0.14936600 |
| H  | 0.60976000  | 0.25260600  | -2.53143100 |
| H  | 2.33673000  | 0.52133700  | -2.18814000 |
| H  | -0.03564300 | 2.36450300  | -1.65833300 |
| H  | 1.53553100  | 2.81674800  | -2.32048500 |
| H  | 1.20691000  | 3.57652900  | 0.11225100  |
| H  | 2.59777300  | 2.50428100  | -0.09427800 |
| H  | -0.17223200 | 1.66114300  | 0.94180000  |
| H  | 1.35190700  | 1.52466700  | 1.81199100  |
| C  | -3.45169000 | 3.17138100  | 1.22848700  |
| H  | -3.60472000 | 4.21983000  | 0.95677100  |
| H  | -4.41709400 | 2.73921200  | 1.50515300  |
| H  | -2.79001800 | 3.13216800  | 2.09836300  |
| H  | -1.73970000 | -1.27726000 | 1.07791700  |
| Br | -4.01518200 | -1.91924700 | 0.20000800  |

(4) TS<sub>SN2</sub>

Total energy: -5501.52845809 Hartree

Free energy: =-5501.269126 Hartree

Imaginary frequency: 379.9  $\text{icm}^{-1}$

|    |             |             |             |
|----|-------------|-------------|-------------|
| C  | -1.19113400 | -0.99153900 | -0.04174800 |
| As | 0.91509500  | 0.25437700  | -0.12734300 |
| H  | -0.87446800 | -1.58770100 | -0.88019100 |
| C  | 0.92519700  | 2.07444500  | 0.62543900  |
| C  | 1.13528800  | 0.94105200  | -1.96194900 |
| C  | 5.14009000  | -1.72616500 | 0.70509900  |



|    |             |             |             |
|----|-------------|-------------|-------------|
| C  | 4.94007800  | -0.38263700 | 1.02751800  |
| C  | 3.69845900  | 0.21417200  | 0.80448900  |
| C  | 2.64015300  | -0.52821300 | 0.26544700  |
| C  | 2.85041200  | -1.87637900 | -0.05572100 |
| C  | 4.09297000  | -2.47246600 | 0.16156500  |
| H  | 6.10633300  | -2.18981700 | 0.87852200  |
| H  | 5.75068300  | 0.20433700  | 1.44878900  |
| H  | 3.56885000  | 1.26050400  | 1.06143200  |
| H  | 2.04296000  | -2.47424400 | -0.47000700 |
| H  | 4.23965400  | -3.51819100 | -0.09061900 |
| C  | -1.89194900 | 0.29013600  | -0.32047400 |
| O  | -2.28573100 | 0.88183400  | 0.82066200  |
| O  | -2.00302800 | 0.78442500  | -1.42825800 |
| C  | -3.06226300 | 2.09733700  | 0.66867100  |
| H  | -2.50431900 | 2.80162000  | 0.04372400  |
| H  | -3.99089400 | 1.84615700  | 0.14700000  |
| C  | 0.86894400  | 2.45295800  | -1.84142900 |
| C  | 1.45884200  | 2.96141900  | -0.51210000 |
| H  | 0.43309300  | 0.43382300  | -2.62327400 |
| H  | 2.16288600  | 0.72189700  | -2.26000200 |
| H  | -0.21332000 | 2.62173700  | -1.84882400 |
| H  | 1.29514800  | 2.99245800  | -2.69383400 |
| H  | 1.20146100  | 4.01269400  | -0.34217500 |
| H  | 2.55331800  | 2.89433100  | -0.54719300 |
| H  | -0.11644400 | 2.29836200  | 0.86671300  |
| H  | 1.50715600  | 2.11107600  | 1.54756500  |
| C  | -3.31507300 | 2.63975700  | 2.06017600  |
| H  | -3.91454900 | 3.55261600  | 1.99796800  |
| H  | -3.85607500 | 1.90905100  | 2.66721500  |
| H  | -2.37248900 | 2.87861200  | 2.56185000  |
| H  | -1.04702700 | -1.33595900 | 0.96765200  |
| Br | -3.36000300 | -2.20917600 | -0.08226100 |

(5) S<sub>N</sub>2-product

Total energy: -5501.58256008 Hartree

Free energy: = -5501.317751 Hartree

|    |             |             |             |
|----|-------------|-------------|-------------|
| C  | 0.74638300  | 0.17721900  | -1.51929000 |
| As | -0.54513200 | 0.68338600  | -0.15591000 |
| H  | 0.72431100  | -0.89551200 | -1.68819900 |
| C  | -0.88559900 | 2.56887900  | -0.55222600 |
| C  | -0.06317600 | 1.07603800  | 1.69522800  |
| C  | -4.64596900 | -1.62760900 | -0.50333600 |
| C  | -4.61336100 | -0.23397500 | -0.57064600 |
| C  | -3.39607700 | 0.44062800  | -0.47819900 |
| C  | -2.20103800 | -0.27550400 | -0.31939100 |
| C  | -2.23944800 | -1.67328500 | -0.23456400 |
| C  | -3.45922500 | -2.34255500 | -0.33465400 |
| H  | -5.59344600 | -2.15278500 | -0.57767900 |
| H  | -5.53160300 | 0.33149800  | -0.69487900 |
| H  | -3.39772600 | 1.52341000  | -0.53745800 |
| H  | -1.32098100 | -2.22697900 | -0.06401300 |
| H  | -3.47800100 | -3.42612000 | -0.27176200 |
| C  | 2.09457400  | 0.63864600  | -1.01066800 |
| O  | 3.08877400  | -0.06138000 | -1.54580800 |
| O  | 2.21606300  | 1.57283400  | -0.23252500 |
| C  | 4.42455500  | 0.13427500  | -0.99016700 |
| H  | 5.09648800  | 0.04600600  | -1.84633800 |
| H  | 4.49096900  | 1.14363500  | -0.58019100 |
| C  | -0.07586900 | 2.60940400  | 1.79760200  |
| C  | -1.13105300 | 3.18743200  | 0.83184900  |
| H  | 0.87757900  | 0.58580500  | 1.92473000  |
| H  | -0.87328900 | 0.60603300  | 2.25756200  |
| H  | 0.91185400  | 2.98778900  | 1.51994300  |
| H  | -0.27871900 | 2.91366200  | 2.82931400  |
| H  | -1.07287200 | 4.27972100  | 0.79324300  |
| H  | -2.13821900 | 2.92694600  | 1.18218600  |
| H  | 0.05283000  | 2.92700600  | -0.98288000 |
| H  | -1.69599400 | 2.71062300  | -1.26723600 |
| C  | 4.68288500  | -0.93129700 | 0.06099300  |
| H  | 5.66339900  | -0.76753500 | 0.51947600  |
| H  | 3.90759000  | -0.90445500 | 0.83068600  |

|    |            |             |             |
|----|------------|-------------|-------------|
| H  | 4.66594300 | -1.92800900 | -0.38744000 |
| H  | 0.46281900 | 0.73937300  | -2.41605700 |
| Br | 1.10435000 | -1.95866400 | 0.90267200  |

(6) AcONa

Total energy: -390.871302572 Hartree

Free energy: = -390.849976 Hartree

|    |             |             |             |
|----|-------------|-------------|-------------|
| C  | 0.53679100  | 0.00113600  | -0.01693400 |
| O  | -0.05677100 | 1.12422900  | -0.00937200 |
| O  | -0.05546800 | -1.12283800 | -0.00944200 |
| Na | -2.00301100 | -0.00096800 | 0.01012100  |
| C  | 2.06466100  | 0.00006800  | 0.00664400  |
| H  | 2.46204900  | 0.91300700  | -0.44159100 |
| H  | 2.40161200  | -0.04075900 | 1.04892100  |
| H  | 2.45865600  | -0.87994700 | -0.50641500 |

(7) Base-adduct

Total energy: -5892.49622210 Hartree

Free energy: = -5892.188795 Hartree

|    |             |             |             |
|----|-------------|-------------|-------------|
| C  | -0.78899000 | -0.72407500 | -1.14468800 |
| As | 0.86212000  | -1.12187000 | -0.23003600 |
| C  | 1.39789600  | -2.87254000 | -0.95826200 |
| C  | 0.84438800  | -1.80680400 | 1.59640700  |
| C  | 4.36041300  | 1.80975200  | -1.30102200 |
| C  | 3.04318200  | 2.19877600  | -1.55469300 |
| C  | 1.97979500  | 1.35364800  | -1.23820300 |
| C  | 2.25382100  | 0.10099100  | -0.67967100 |
| C  | 3.57044900  | -0.29380900 | -0.41828600 |
| C  | 4.62528000  | 0.56363600  | -0.73001200 |
| H  | 5.18043100  | 2.47862600  | -1.54429700 |
| H  | 2.83600700  | 3.17081400  | -1.99111500 |
| H  | 0.95901800  | 1.68618100  | -1.40690100 |
| H  | 3.78701300  | -1.26327600 | 0.02163400  |
| H  | 5.64663000  | 0.25869300  | -0.52485200 |

|    |             |             |             |
|----|-------------|-------------|-------------|
| C  | -2.01008100 | -1.22350400 | -0.43685700 |
| O  | -2.94382300 | -1.59523900 | -1.30879300 |
| O  | -2.15041200 | -1.24416400 | 0.78284500  |
| C  | -4.30477900 | -1.78773200 | -0.81719600 |
| H  | -4.68606800 | -2.64132600 | -1.38115700 |
| H  | -4.26440100 | -2.04329300 | 0.24289000  |
| C  | 0.85885400  | -3.33099800 | 1.42386700  |
| C  | 1.81306400  | -3.69697100 | 0.27114500  |
| H  | -0.01058300 | -1.40672700 | 2.13001300  |
| H  | 1.76660100  | -1.41180600 | 2.02853100  |
| H  | -0.15496300 | -3.67047100 | 1.17785700  |
| H  | 1.15299200  | -3.81670800 | 2.35941800  |
| H  | 1.78324100  | -4.76919900 | 0.05430300  |
| H  | 2.84361800  | -3.45493200 | 0.55883500  |
| H  | 0.50698800  | -3.29312400 | -1.43303100 |
| H  | 2.17830700  | -2.73825500 | -1.70782300 |
| C  | -5.10002500 | -0.51867900 | -1.07493300 |
| H  | -6.10942100 | -0.62454300 | -0.66451400 |
| H  | -4.60230900 | 0.33881800  | -0.61363200 |
| H  | -5.18042700 | -0.32764100 | -2.14870200 |
| H  | -0.69183100 | -1.17043500 | -2.13579800 |
| Br | 0.44874200  | 1.50659000  | 1.84751500  |
| O  | -1.16768900 | 2.09475700  | -1.72588700 |
| C  | -1.87713500 | 2.51166100  | -0.77051100 |
| O  | -2.72158800 | 1.80308500  | -0.12992700 |
| Na | -2.15589200 | 0.90273400  | 1.77517900  |
| C  | -1.64886300 | 3.94508600  | -0.29780600 |
| H  | -0.83204100 | 3.89815800  | 0.43245600  |
| H  | -1.33700500 | 4.58871000  | -1.12371200 |
| H  | -2.53432000 | 4.35419500  | 0.19459500  |
| H  | -0.91409000 | 0.38041800  | -1.28536800 |

(8) TS<sub>deprotonate</sub>

Total energy: -5892.48803609 Hartree

Free energy: = -5892.184363 Hartree

Imaginary frequency: 1266.3  $\text{icm}^{-1}$

|    |             |             |             |
|----|-------------|-------------|-------------|
| C  | 0.83047400  | 0.70657900  | -1.13789400 |
| As | -0.79120000 | 1.13059100  | -0.24419900 |
| H  | 1.02183000  | -0.67500900 | -1.32201300 |
| C  | -1.30402600 | 2.92915600  | -0.88082500 |
| C  | -0.76597200 | 1.72157900  | 1.61314800  |
| C  | -4.51087000 | -1.56022500 | -1.25063700 |
| C  | -3.23313900 | -2.01547900 | -1.58271000 |
| C  | -2.10899300 | -1.24378300 | -1.28950000 |
| C  | -2.27210200 | 0.00018400  | -0.67383400 |
| C  | -3.55091900 | 0.45778300  | -0.33623700 |
| C  | -4.67021500 | -0.32277000 | -0.62439000 |
| H  | -5.38082700 | -2.16976300 | -1.47579300 |
| H  | -3.10636700 | -2.98125300 | -2.06207000 |
| H  | -1.11911000 | -1.62200600 | -1.51728900 |
| H  | -3.68864000 | 1.42058500  | 0.14772600  |
| H  | -5.66008000 | 0.03459000  | -0.35805200 |
| C  | 2.01918500  | 1.19454700  | -0.45426000 |
| O  | 2.97536100  | 1.58166000  | -1.32276500 |
| O  | 2.19873000  | 1.19425100  | 0.77336600  |
| C  | 4.32490500  | 1.74168200  | -0.81454600 |
| H  | 4.75289000  | 2.55423800  | -1.40631300 |
| H  | 4.28076400  | 2.04598700  | 0.23293100  |
| C  | -0.68939200 | 3.25032900  | 1.50903300  |
| C  | -1.63913300 | 3.72399700  | 0.39233800  |
| H  | 0.05851900  | 1.26112000  | 2.14459600  |
| H  | -1.71384800 | 1.36531100  | 2.02307200  |
| H  | 0.34018700  | 3.53267500  | 1.25592600  |
| H  | -0.93516100 | 3.71363100  | 2.46982400  |
| H  | -1.54478400 | 4.80109200  | 0.22095100  |
| H  | -2.67736500 | 3.53697400  | 0.69334300  |
| H  | -0.41462500 | 3.32680900  | -1.37639900 |
| H  | -2.11869400 | 2.85363100  | -1.60186800 |
| C  | 5.09405000  | 0.44191400  | -0.99515600 |
| H  | 6.10742100  | 0.54644000  | -0.59368300 |
| H  | 4.58377200  | -0.37673200 | -0.48062800 |

|    |             |             |             |
|----|-------------|-------------|-------------|
| H  | 5.16675000  | 0.18321200  | -2.05554600 |
| H  | 0.73544500  | 1.08963900  | -2.15508800 |
| Br | -0.48193000 | -1.66475300 | 1.75867200  |
| O  | 1.09541000  | -1.85918500 | -1.58290900 |
| C  | 1.83677800  | -2.50005800 | -0.73705000 |
| O  | 2.70963000  | -1.96291900 | -0.02385900 |
| Na | 2.07553200  | -0.86070400 | 1.80271600  |
| C  | 1.52929700  | -3.97392400 | -0.60493400 |
| H  | 0.68374400  | -4.03493700 | 0.09059600  |
| H  | 1.22381800  | -4.40573600 | -1.56013300 |
| H  | 2.37806800  | -4.51543500 | -0.18485000 |

(9) Base-adduct

Total energy: -5892.49060333 Hartree

Free energy: = -5892.185035 Hartree

|    |             |             |             |
|----|-------------|-------------|-------------|
| C  | 0.77384100  | 0.82575500  | -1.13738600 |
| As | -0.85431900 | 1.13885900  | -0.26434300 |
| C  | -1.51130500 | 2.90655600  | -0.86402400 |
| C  | -0.86787400 | 1.69330200  | 1.60294200  |
| C  | -4.42094400 | -1.76830100 | -1.24939700 |
| C  | -3.12558000 | -2.12951800 | -1.62550200 |
| C  | -2.04825100 | -1.29164800 | -1.33832200 |
| C  | -2.27202400 | -0.07822800 | -0.68359700 |
| C  | -3.56939600 | 0.28390700  | -0.30363600 |
| C  | -4.64305100 | -0.56042600 | -0.58545500 |
| H  | -5.25508400 | -2.42759000 | -1.46984300 |
| H  | -2.94878500 | -3.07201600 | -2.13454400 |
| H  | -1.04393200 | -1.59835700 | -1.60179600 |
| H  | -3.75603000 | 1.22284700  | 0.20996000  |
| H  | -5.64677500 | -0.27579000 | -0.28524700 |
| C  | 1.94021100  | 1.31862200  | -0.47921600 |
| O  | 2.90949600  | 1.69438400  | -1.35890100 |
| O  | 2.13342700  | 1.36252700  | 0.75588100  |
| C  | 4.24927500  | 1.87544700  | -0.84925100 |
| H  | 4.67290400  | 2.68919100  | -1.44400100 |

|    |             |             |             |
|----|-------------|-------------|-------------|
| H  | 4.20099500  | 2.18742900  | 0.19608800  |
| C  | -0.88197300 | 3.22546700  | 1.52394900  |
| C  | -1.87220700 | 3.66069500  | 0.42676100  |
| H  | -0.01514700 | 1.28025100  | 2.12826500  |
| H  | -1.79079400 | 1.27499700  | 2.01112900  |
| H  | 0.12677100  | 3.56828100  | 1.26175600  |
| H  | -1.14083200 | 3.65966700  | 2.49492400  |
| H  | -1.84221000 | 4.74430300  | 0.27280000  |
| H  | -2.89376300 | 3.40973400  | 0.73852300  |
| H  | -0.65706100 | 3.36366200  | -1.36950900 |
| H  | -2.33365400 | 2.78785600  | -1.57053200 |
| C  | 5.04718200  | 0.59005200  | -1.01394300 |
| H  | 6.06503100  | 0.72556200  | -0.63291300 |
| H  | 4.56844600  | -0.22918500 | -0.47105400 |
| H  | 5.10820800  | 0.30859200  | -2.06956400 |
| H  | 0.67927500  | 1.08836500  | -2.18938700 |
| Br | -0.38462700 | -1.71100300 | 1.72415600  |
| O  | 1.23439500  | -1.89957800 | -1.51160700 |
| C  | 2.01547700  | -2.49838400 | -0.63394200 |
| O  | 2.81371600  | -1.89894100 | 0.09094500  |
| Na | 2.07513700  | -0.63676600 | 1.81539400  |
| C  | 1.80005200  | -3.98353200 | -0.55745300 |
| H  | 0.93501100  | -4.11757300 | 0.10301700  |
| H  | 1.55917200  | -4.40534700 | -1.53489000 |
| H  | 2.66805500  | -4.47557200 | -0.11873200 |
| H  | 1.15926300  | -0.88784100 | -1.32161700 |

[C] The reaction between benzaldehyde and the arsonium ylide formed from the first half reactions between ethyl bromoacetate, **5**, and the Cy<sub>2</sub>MeN base. Their total energies were obtained at the B3LYP-D3 calculations using the polarizable continuum model to include solvent effects of THF. Their free energies were also obtained at 25 °C.

(Scheme 4 & Figure S30)

(1) benzaldehyde

Total energy: -345.595969703 Hartree

Free energy: = -345.516407 Hartree

|   |             |             |             |
|---|-------------|-------------|-------------|
| C | 1.98862700  | 0.47163600  | 0.00014700  |
| H | 2.27107500  | 1.54599300  | 0.00007100  |
| O | 2.84677700  | -0.39719100 | 0.00009100  |
| C | 0.53424800  | 0.21521700  | 0.00005600  |
| C | 0.04645100  | -1.10194500 | 0.00002800  |
| C | -0.36085700 | 1.29451000  | -0.00000100 |
| C | -1.32475500 | -1.33324300 | -0.00004900 |
| H | 0.75821000  | -1.92117200 | 0.00008400  |
| C | -1.73558600 | 1.06071800  | -0.00012300 |
| H | 0.02291900  | 2.31159400  | 0.00001400  |
| C | -2.21548500 | -0.25174700 | -0.00013100 |
| H | -1.70613600 | -2.34959000 | -0.00006400 |
| H | -2.43028500 | 1.89465100  | -0.00018600 |
| H | -3.28586000 | -0.43482400 | -0.00020300 |

(2) Z-reactant complex

Total energy: -3982.85788793 Hartree

Free energy: = -3982.238712 Hartree

|    |            |             |             |
|----|------------|-------------|-------------|
| C  | 0.21690200 | 0.34724100  | -2.22454600 |
| As | 0.64007000 | -0.01610800 | -0.47451900 |
| C  | 3.31899100 | -3.94558600 | -0.36434000 |
| C  | 3.68543500 | -2.77806800 | 0.35196200  |
| C  | 2.89500800 | -1.63744900 | 0.30939800  |
| C  | 1.71005600 | -1.59501900 | -0.43586100 |
| C  | 1.33083000 | -2.74993200 | -1.13632800 |
| C  | 2.10933400 | -3.89914100 | -1.10360500 |



|   |             |             |             |
|---|-------------|-------------|-------------|
| H | 4.59122300  | -2.75742300 | 0.94425200  |
| H | 3.21603700  | -0.76571900 | 0.87162000  |
| H | 0.40398800  | -2.76630600 | -1.70106500 |
| H | 1.77015600  | -4.76600200 | -1.65629400 |
| C | -0.58470700 | 1.47189200  | -2.46639000 |
| O | -0.97841900 | 1.57256900  | -3.79751400 |
| O | -0.95069600 | 2.32516200  | -1.63514400 |
| C | -1.62895500 | 2.79959100  | -4.17075900 |
| H | -2.13854300 | 2.57071900  | -5.11117000 |
| H | -2.37888600 | 3.06408100  | -3.41890300 |
| C | -0.62804300 | 3.93383400  | -4.34848900 |
| H | -1.13517100 | 4.84082500  | -4.69464400 |
| H | -0.13995500 | 4.14902400  | -3.39485200 |
| H | 0.13615200  | 3.66237600  | -5.08341900 |
| H | 0.47484800  | -0.36428700 | -2.99499100 |
| C | -0.77873000 | -0.24777700 | 0.79420900  |
| C | -0.96755500 | -1.46080600 | 1.46148200  |
| C | -1.63771200 | 0.82249300  | 1.08559400  |
| C | -2.00281500 | -1.62050200 | 2.37557800  |
| H | -0.31353500 | -2.30283900 | 1.25784500  |
| C | -2.66152200 | 0.68164600  | 2.00822700  |
| H | -1.51029300 | 1.76364500  | 0.56339000  |
| C | -2.88526000 | -0.55205600 | 2.66959500  |
| H | -2.12470500 | -2.58279500 | 2.85626300  |
| H | -3.31517500 | 1.52548000  | 2.18605300  |
| C | 1.69247800  | 1.39777000  | 0.27024100  |
| C | 2.44956900  | 2.22103200  | -0.56928100 |
| C | 1.73717000  | 1.63681100  | 1.64794000  |
| C | 3.23213500  | 3.24778600  | -0.06040800 |
| H | 2.40767400  | 2.06208600  | -1.64361200 |
| C | 2.51851700  | 2.65521200  | 2.17886000  |
| H | 1.14500800  | 1.02702600  | 2.32416300  |
| C | 3.29691700  | 3.48945200  | 1.33644300  |
| H | 3.78947000  | 3.86695500  | -0.75165800 |
| H | 2.51491600  | 2.80626200  | 3.25071600  |
| N | 4.10434000  | -5.07576100 | -0.34423400 |

|   |             |             |             |
|---|-------------|-------------|-------------|
| N | -3.92767800 | -0.70644400 | 3.55972600  |
| N | 4.08688500  | 4.49318400  | 1.85387700  |
| C | -4.88787000 | 0.37280400  | 3.74251500  |
| H | -5.62898000 | 0.07169100  | 4.48281800  |
| H | -4.39751700 | 1.28036700  | 4.11314800  |
| H | -5.41260500 | 0.62517400  | 2.81080900  |
| C | -4.25307800 | -2.03280000 | 4.06261600  |
| H | -4.48963400 | -2.73700900 | 3.25189000  |
| H | -3.42536700 | -2.45408200 | 4.64542700  |
| H | -5.11974500 | -1.96593200 | 4.71999300  |
| C | 5.27970500  | -5.12839800 | 0.51296800  |
| H | 5.02458500  | -5.01161500 | 1.57562700  |
| H | 5.77376900  | -6.09130200 | 0.38605300  |
| H | 6.00096100  | -4.34574100 | 0.24916300  |
| C | 3.64256100  | -6.29362700 | -0.99482300 |
| H | 2.70096100  | -6.66268200 | -0.56479600 |
| H | 3.48702100  | -6.13767900 | -2.06893300 |
| H | 4.39708700  | -7.07112400 | -0.87804500 |
| C | 4.02231000  | 4.80557100  | 3.27424900  |
| H | 4.71671800  | 5.61577300  | 3.49562200  |
| H | 3.01650500  | 5.12030300  | 3.58709100  |
| H | 4.31273900  | 3.94241000  | 3.88452400  |
| C | 4.76021900  | 5.42085100  | 0.95624400  |
| H | 5.45567000  | 4.89584600  | 0.29110600  |
| H | 4.05297600  | 5.98531900  | 0.33205100  |
| H | 5.33880000  | 6.13291000  | 1.54433300  |
| C | -2.31117800 | -1.51183400 | -2.06384700 |
| O | -1.86001700 | -2.57998600 | -1.66595200 |
| H | -1.90055900 | -1.01909800 | -2.96053900 |
| C | -3.44387700 | -0.81178000 | -1.43047200 |
| C | -3.83996900 | 0.44284900  | -1.91601900 |
| C | -4.14933900 | -1.41177100 | -0.37700600 |
| C | -4.92604500 | 1.10008400  | -1.34094900 |
| H | -3.28542400 | 0.89680800  | -2.73104300 |
| C | -5.24240800 | -0.76185200 | 0.18480500  |
| H | -3.81685500 | -2.37629300 | -0.01088000 |

|   |             |             |             |
|---|-------------|-------------|-------------|
| C | -5.62817200 | 0.49596100  | -0.29363200 |
| H | -5.22747400 | 2.07652000  | -1.70753600 |
| H | -5.78771400 | -1.22268500 | 1.00267300  |
| H | -6.47862100 | 1.00485100  | 0.15114000  |

(2) Z-TS1

Total energy: -3982.84422186 Hartree

Free energy: = -3982.223535 Hartree

Imaginary frequency: 305.2  $\text{icm}^{-1}$

|    |             |             |             |
|----|-------------|-------------|-------------|
| C  | -0.23570200 | 0.35808600  | -2.03322000 |
| As | 0.39452000  | -0.16459800 | -0.30797300 |
| C  | 3.99449400  | -3.25593400 | -0.62271000 |
| C  | 4.00035400  | -2.18749700 | 0.31082800  |
| C  | 2.93784800  | -1.29858600 | 0.38446800  |
| C  | 1.82016900  | -1.42735700 | -0.45379100 |
| C  | 1.79479400  | -2.48911400 | -1.36962000 |
| C  | 2.85317600  | -3.38267200 | -1.45592600 |
| H  | 4.83838200  | -2.04656100 | 0.98125600  |
| H  | 2.99148300  | -0.49075900 | 1.10746600  |
| H  | 0.91280800  | -2.61713800 | -1.99254700 |
| H  | 2.78765600  | -4.18867800 | -2.17587800 |
| C  | -0.77236100 | 1.71430100  | -2.00406000 |
| O  | -0.65479800 | 2.33710500  | -3.20893400 |
| O  | -1.33679200 | 2.23511800  | -1.04353900 |
| C  | -1.19517100 | 3.67858700  | -3.28801100 |
| H  | -1.36053600 | 3.84511000  | -4.35479400 |
| H  | -2.15576700 | 3.70778200  | -2.76752800 |
| C  | -0.21830200 | 4.69072100  | -2.70758400 |
| H  | -0.61847500 | 5.70402200  | -2.81508400 |
| H  | -0.05149200 | 4.48997300  | -1.64670000 |
| H  | 0.74210400  | 4.64060000  | -3.22935700 |
| H  | 0.57061500  | 0.20210100  | -2.74688700 |
| C  | -0.94597000 | -0.80904900 | 0.87091200  |
| C  | -0.90740800 | -2.12317600 | 1.34333400  |
| C  | -1.99701600 | 0.02529200  | 1.26743900  |

|   |             |             |             |
|---|-------------|-------------|-------------|
| C | -1.89579900 | -2.60288800 | 2.19124400  |
| H | -0.10811600 | -2.78884500 | 1.03399300  |
| C | -2.97819300 | -0.43497400 | 2.13287900  |
| H | -2.05749800 | 1.03602100  | 0.87983200  |
| C | -2.96250600 | -1.76792000 | 2.61399500  |
| H | -1.83870000 | -3.63201000 | 2.52133000  |
| H | -3.78189100 | 0.23739600  | 2.40248900  |
| C | 1.17932800  | 1.35389100  | 0.54470500  |
| C | 1.94724500  | 2.25647900  | -0.20236100 |
| C | 1.02331500  | 1.59581900  | 1.91263500  |
| C | 2.52740800  | 3.37094400  | 0.38413800  |
| H | 2.08173900  | 2.10517300  | -1.27005200 |
| C | 1.60261500  | 2.70250700  | 2.52118700  |
| H | 0.42832000  | 0.92054700  | 2.51965100  |
| C | 2.37443100  | 3.62599700  | 1.77236600  |
| H | 3.09785000  | 4.04614300  | -0.24036600 |
| H | 1.44393000  | 2.85059900  | 3.58153000  |
| N | 5.05163400  | -4.12991800 | -0.71527100 |
| N | -3.94463000 | -2.23372700 | 3.46409800  |
| N | 2.95625200  | 4.72315100  | 2.36574600  |
| C | -5.13450900 | -1.42443100 | 3.69199100  |
| H | -5.80190600 | -1.95223000 | 4.37306700  |
| H | -4.87760800 | -0.46615800 | 4.15635200  |
| H | -5.68327700 | -1.21627300 | 2.76173700  |
| C | -4.00266100 | -3.65368500 | 3.78391000  |
| H | -4.15094400 | -4.27954700 | 2.89179900  |
| H | -3.08413700 | -3.98281200 | 4.28168000  |
| H | -4.83062900 | -3.83273300 | 4.46975700  |
| C | 6.16686600  | -4.02663400 | 0.21484400  |
| H | 5.84855300  | -4.16151000 | 1.25767700  |
| H | 6.90107900  | -4.79740200 | -0.01753100 |
| H | 6.66622100  | -3.05330100 | 0.13535600  |
| C | 4.98333100  | -5.26287000 | -1.62734200 |
| H | 4.15577100  | -5.94215500 | -1.38113000 |
| H | 4.85483100  | -4.93339600 | -2.66539100 |
| H | 5.91377800  | -5.82696700 | -1.56961700 |

|   |             |             |             |
|---|-------------|-------------|-------------|
| C | 2.67662500  | 5.02444000  | 3.76254500  |
| H | 3.22555100  | 5.91962100  | 4.05349100  |
| H | 1.60732700  | 5.20332400  | 3.94306700  |
| H | 2.99985500  | 4.20721000  | 4.41793800  |
| C | 3.62845000  | 5.72093400  | 1.54534600  |
| H | 4.47228200  | 5.28410700  | 0.99853300  |
| H | 2.95047500  | 6.18261000  | 0.81380800  |
| H | 4.02213900  | 6.50766300  | 2.18832000  |
| C | -1.48799700 | -1.03877000 | -2.54111900 |
| O | -1.10528900 | -2.13736300 | -2.00394600 |
| H | -1.30246200 | -0.87952300 | -3.62680800 |
| C | -2.86155300 | -0.50406600 | -2.17841200 |
| C | -3.44788300 | 0.54946900  | -2.89372800 |
| C | -3.60443700 | -1.13368900 | -1.17630300 |
| C | -4.73500200 | 0.99053100  | -2.58821500 |
| H | -2.88426400 | 1.03086800  | -3.68912100 |
| C | -4.89383300 | -0.69774500 | -0.86733500 |
| H | -3.14424600 | -1.95649600 | -0.64114300 |
| C | -5.46318000 | 0.36773000  | -1.56852200 |
| H | -5.17334400 | 1.81341900  | -3.14656000 |
| H | -5.45294500 | -1.18869000 | -0.07497800 |
| H | -6.46725100 | 0.70715700  | -1.32925600 |

### (3) Z-INT

Total energy: -3982.85693942 Hartree

Free energy: = -3982.232849 Hartree

|    |             |             |             |
|----|-------------|-------------|-------------|
| C  | -0.44029200 | 0.78431400  | -2.08866800 |
| As | 0.16212600  | -0.30709200 | -0.53699900 |
| C  | 4.04445000  | -3.07012000 | -0.82002700 |
| C  | 3.79275900  | -2.23424600 | 0.29793300  |
| C  | 2.66393500  | -1.42929200 | 0.34645300  |
| C  | 1.71515700  | -1.42955400 | -0.68694000 |
| C  | 1.94542100  | -2.26999800 | -1.78209500 |
| C  | 3.07906100  | -3.06902900 | -1.85776300 |
| H  | 4.48328300  | -2.20731700 | 1.13122800  |

|   |             |             |             |
|---|-------------|-------------|-------------|
| H | 2.52697900  | -0.78959300 | 1.21229500  |
| H | 1.20331800  | -2.31130400 | -2.57025200 |
| H | 3.20802200  | -3.69997100 | -2.72807600 |
| C | -1.03586300 | 2.09285200  | -1.66007100 |
| O | -0.50818400 | 3.13159300  | -2.33310800 |
| O | -1.88121000 | 2.21175600  | -0.79043100 |
| C | -0.94064800 | 4.45851100  | -1.91855400 |
| H | -0.72752100 | 5.09179300  | -2.78174600 |
| H | -2.01893800 | 4.43745400  | -1.74353400 |
| C | -0.17982600 | 4.90973400  | -0.68219100 |
| H | -0.48694000 | 5.92468300  | -0.41033900 |
| H | -0.38099800 | 4.24296700  | 0.15908500  |
| H | 0.89696400  | 4.90569200  | -0.86710400 |
| H | 0.44875800  | 0.94300800  | -2.70252500 |
| C | -1.03718600 | -0.99087000 | 0.79445400  |
| C | -0.82444200 | -2.27959700 | 1.29381600  |
| C | -2.15655500 | -0.28111800 | 1.24079100  |
| C | -1.68708800 | -2.84176400 | 2.22788300  |
| H | 0.02316300  | -2.86480900 | 0.94973700  |
| C | -3.02399800 | -0.82872700 | 2.17852900  |
| H | -2.36732400 | 0.70378000  | 0.84206600  |
| C | -2.81110900 | -2.12510700 | 2.70709000  |
| H | -1.48237200 | -3.84476400 | 2.58004300  |
| H | -3.88219500 | -0.24458300 | 2.48543700  |
| C | 1.02102200  | 1.18320100  | 0.45320000  |
| C | 2.06224900  | 1.87306400  | -0.18434400 |
| C | 0.65136900  | 1.62322000  | 1.72630300  |
| C | 2.69291400  | 2.96433400  | 0.39875800  |
| H | 2.40876900  | 1.54601200  | -1.16269900 |
| C | 1.26257300  | 2.72023200  | 2.33034000  |
| H | -0.13742100 | 1.11217700  | 2.26948000  |
| C | 2.28914000  | 3.43783600  | 1.67187000  |
| H | 3.49599900  | 3.45097900  | -0.14039700 |
| H | 0.93382600  | 3.01569600  | 3.31896200  |
| N | 5.17976200  | -3.84715600 | -0.89321100 |
| N | -3.66217700 | -2.66647100 | 3.65480900  |

|   |             |             |             |
|---|-------------|-------------|-------------|
| N | 2.86991800  | 4.55748100  | 2.24154000  |
| C | -4.92615000 | -2.00064300 | 3.93737400  |
| H | -5.46576500 | -2.56455100 | 4.69849700  |
| H | -4.76053400 | -0.99154200 | 4.33000700  |
| H | -5.56816900 | -1.91829400 | 3.04753500  |
| C | -3.53458300 | -4.07369900 | 4.00642500  |
| H | -3.68929100 | -4.74122300 | 3.14547000  |
| H | -2.54524100 | -4.28557200 | 4.42615700  |
| H | -4.27388300 | -4.32067100 | 4.76865300  |
| C | 6.07246400  | -3.93515200 | 0.25354800  |
| H | 5.57188400  | -4.34616300 | 1.14180600  |
| H | 6.91251300  | -4.58361000 | 0.00561800  |
| H | 6.47823100  | -2.95162800 | 0.51741000  |
| C | 5.33840600  | -4.79582500 | -1.98620000 |
| H | 4.54369800  | -5.55529700 | -1.99818100 |
| H | 5.33558400  | -4.28675600 | -2.95692400 |
| H | 6.29587200  | -5.30602500 | -1.88271500 |
| C | 2.57296900  | 4.89097800  | 3.62631500  |
| H | 3.10984400  | 5.79947200  | 3.90007100  |
| H | 1.50317000  | 5.08462500  | 3.76456600  |
| H | 2.86610000  | 4.09349700  | 4.32541300  |
| C | 4.04322300  | 5.15133100  | 1.61897900  |
| H | 4.89488500  | 4.45630600  | 1.57010800  |
| H | 3.82125900  | 5.48578900  | 0.59918600  |
| H | 4.34953700  | 6.02644600  | 2.19246100  |
| C | -1.31300200 | -0.37504000 | -2.65878900 |
| O | -0.81591200 | -1.48102000 | -1.97076600 |
| H | -1.10889900 | -0.44329600 | -3.74381100 |
| C | -2.81623800 | -0.16842700 | -2.50305600 |
| C | -3.48937600 | 0.80196800  | -3.25653800 |
| C | -3.54620700 | -0.97014100 | -1.62429300 |
| C | -4.86598500 | 0.98012700  | -3.12084100 |
| H | -2.92824600 | 1.42807500  | -3.94789000 |
| C | -4.92543600 | -0.79658800 | -1.48556800 |
| H | -3.00998000 | -1.71699800 | -1.05259900 |
| C | -5.58996400 | 0.17987500  | -2.23040000 |

|   |             |             |             |
|---|-------------|-------------|-------------|
| H | -5.37492400 | 1.73981100  | -3.70786700 |
| H | -5.47979600 | -1.42183900 | -0.79049100 |
| H | -6.66242100 | 0.31614100  | -2.12302500 |

(4) Z-TS2

Total energy: -3982.83652299 Hartree

Free energy: = -3982.212433 Hartree

Imaginary frequency: 13.7  $\text{icm}^{-1}$

|    |             |             |             |
|----|-------------|-------------|-------------|
| C  | -1.96734800 | 0.77589400  | -2.39450900 |
| As | 0.54841400  | 0.02202200  | -0.52032900 |
| C  | 5.27945400  | -0.20388700 | -0.39494600 |
| C  | 4.55292300  | 0.66154800  | 0.46463000  |
| C  | 3.16916900  | 0.72896400  | 0.40260400  |
| C  | 2.44270100  | -0.05001200 | -0.50725600 |
| C  | 3.14926400  | -0.90909000 | -1.35931900 |
| C  | 4.53290800  | -0.98908100 | -1.31298300 |
| H  | 5.07009800  | 1.28700700  | 1.18053200  |
| H  | 2.65176000  | 1.41032500  | 1.07202200  |
| H  | 2.60987100  | -1.51957300 | -2.07608500 |
| H  | 5.03477900  | -1.66379700 | -1.99428000 |
| C  | -2.98516000 | 0.81003500  | -1.43597700 |
| O  | -3.47109200 | 2.11885400  | -1.26967100 |
| O  | -3.50694300 | -0.11494200 | -0.77522700 |
| C  | -4.56667600 | 2.27534300  | -0.36388100 |
| H  | -5.07002600 | 3.19643600  | -0.67825200 |
| H  | -5.26667800 | 1.44080800  | -0.47406000 |
| C  | -4.10286300 | 2.38471800  | 1.08376400  |
| H  | -4.95504600 | 2.56375100  | 1.74948800  |
| H  | -3.60913500 | 1.45726200  | 1.38300800  |
| H  | -3.38864400 | 3.20458300  | 1.19953600  |
| H  | -1.68234500 | 1.72509400  | -2.83371100 |
| C  | -0.06319200 | -1.23965800 | 0.75765400  |
| C  | 0.87280300  | -2.02552600 | 1.44675900  |
| C  | -1.42998300 | -1.41842700 | 1.02166000  |



|   |             |             |             |
|---|-------------|-------------|-------------|
| C | 0.46187100  | -2.96602300 | 2.37932200  |
| H | 1.93439700  | -1.91107000 | 1.25473900  |
| C | -1.84717300 | -2.35236500 | 1.95582400  |
| H | -2.17999500 | -0.85244000 | 0.47273700  |
| C | -0.91566800 | -3.15535600 | 2.66673200  |
| H | 1.21606800  | -3.55376700 | 2.88634600  |
| H | -2.91045400 | -2.46659000 | 2.12427400  |
| C | 0.06844600  | 1.77093600  | 0.01325800  |
| C | 0.26735500  | 2.86100500  | -0.84529200 |
| C | -0.38519100 | 2.01049500  | 1.31397600  |
| C | -0.00504800 | 4.15195000  | -0.42944000 |
| H | 0.61272300  | 2.69476800  | -1.86096400 |
| C | -0.65136000 | 3.30235500  | 1.74931600  |
| H | -0.54643300 | 1.18399200  | 1.99858200  |
| C | -0.47581800 | 4.41292100  | 0.88710400  |
| H | 0.14289100  | 4.96280800  | -1.13053800 |
| H | -1.01375000 | 3.44046900  | 2.75925900  |
| N | 6.64892600  | -0.27758300 | -0.34172300 |
| N | -1.33052000 | -4.07807400 | 3.59380200  |
| N | -0.74718600 | 5.69377500  | 1.30544200  |
| C | -2.75298500 | -4.30518300 | 3.81277000  |
| H | -2.88048600 | -5.06437100 | 4.58366900  |
| H | -3.25654400 | -3.39243000 | 4.15294700  |
| H | -3.25755400 | -4.65419400 | 2.90211900  |
| C | -0.35828000 | -4.93514400 | 4.25800300  |
| H | 0.18921700  | -5.56532700 | 3.54431900  |
| H | 0.37369500  | -4.34651200 | 4.82420200  |
| H | -0.87557100 | -5.58855800 | 4.95962800  |
| C | 7.38801000  | 0.52849600  | 0.61979000  |
| H | 7.09793500  | 0.29557800  | 1.65241600  |
| H | 8.45315500  | 0.32499300  | 0.51599600  |
| H | 7.23082300  | 1.60227800  | 0.45554500  |
| C | 7.36947700  | -1.17060600 | -1.23849100 |
| H | 7.08548900  | -2.21945300 | -1.08294200 |
| H | 7.18727200  | -0.92070900 | -2.29141900 |
| H | 8.43902600  | -1.08028800 | -1.05238300 |

|   |             |             |             |
|---|-------------|-------------|-------------|
| C | -1.35488400 | 5.91449400  | 2.61069200  |
| H | -1.49580200 | 6.98378200  | 2.76476900  |
| H | -2.33327900 | 5.42211100  | 2.69978300  |
| H | -0.71152200 | 5.54291000  | 3.41670400  |
| C | -0.68095900 | 6.79896400  | 0.35838700  |
| H | 0.32724000  | 6.90602300  | -0.05812100 |
| H | -1.38458600 | 6.67238700  | -0.47588000 |
| H | -0.92685400 | 7.72700000  | 0.87357100  |
| C | -1.17815900 | -0.37868300 | -2.79329500 |
| O | 0.26665000  | -0.37209900 | -2.19764600 |
| H | -0.86446500 | -0.28261400 | -3.84050300 |
| C | -1.76758400 | -1.76802900 | -2.61626100 |
| C | -3.03924400 | -2.02620100 | -3.14860600 |
| C | -1.06202600 | -2.82493300 | -2.03454600 |
| C | -3.59353000 | -3.30264100 | -3.09166700 |
| H | -3.59356000 | -1.20652300 | -3.59439500 |
| C | -1.62043400 | -4.10462600 | -1.96324800 |
| H | -0.08552400 | -2.63945500 | -1.60938300 |
| C | -2.88629500 | -4.35128200 | -2.49308300 |
| H | -4.58191500 | -3.47973700 | -3.50699400 |
| H | -1.05881700 | -4.90711300 | -1.49265600 |
| H | -3.31969200 | -5.34609700 | -2.44175700 |

(5) Z-product complex

Total energy: -3982.87316031 Hartree

Free energy: = -3982.249727 Hartree

|    |             |             |             |
|----|-------------|-------------|-------------|
| C  | -2.77109400 | 0.73827300  | -1.81686000 |
| As | 1.07725800  | 0.06852900  | -0.83001600 |
| C  | 5.75230000  | 0.17730200  | 0.06744100  |
| C  | 4.80816100  | 0.32837500  | 1.11626700  |
| C  | 3.44504200  | 0.29360400  | 0.85643100  |
| C  | 2.95264700  | 0.12048500  | -0.44238500 |
| C  | 3.87621600  | -0.02449100 | -1.48185600 |
| C  | 5.24527500  | 0.00594600  | -1.24528300 |
| H  | 5.13931400  | 0.47094900  | 2.13701500  |

|   |             |             |             |
|---|-------------|-------------|-------------|
| H | 2.76014300  | 0.40654500  | 1.69309400  |
| H | 3.50698300  | -0.15940800 | -2.49459300 |
| H | 5.91951300  | -0.10561000 | -2.08489000 |
| C | -3.69818700 | 0.88973900  | -0.68266900 |
| O | -4.20829200 | 2.14863100  | -0.68043300 |
| O | -3.96529000 | 0.06661000  | 0.18158300  |
| C | -5.06747000 | 2.50465900  | 0.42991100  |
| H | -5.70340200 | 3.30229200  | 0.03939700  |
| H | -5.68930000 | 1.64510300  | 0.69160600  |
| C | -4.24316400 | 2.97863700  | 1.61661600  |
| H | -4.90562300 | 3.27726000  | 2.43548500  |
| H | -3.59128700 | 2.17618700  | 1.97041100  |
| H | -3.62369200 | 3.83359500  | 1.33444000  |
| H | -2.47138800 | 1.68291700  | -2.25618000 |
| C | 0.37720300  | -1.27706000 | 0.33035500  |
| C | 1.10509200  | -2.45296000 | 0.55246600  |
| C | -0.92968300 | -1.19994400 | 0.82622700  |
| C | 0.54267200  | -3.52866700 | 1.22512600  |
| H | 2.12204300  | -2.53736900 | 0.17858300  |
| C | -1.50180000 | -2.26036700 | 1.50955600  |
| H | -1.53398400 | -0.31927600 | 0.64511600  |
| C | -0.79068900 | -3.46894200 | 1.70584200  |
| H | 1.13514500  | -4.42493400 | 1.35675200  |
| H | -2.52725700 | -2.15956100 | 1.83776100  |
| C | 0.28740500  | 1.71781400  | -0.26625300 |
| C | -0.07613800 | 2.66728900  | -1.22544600 |
| C | 0.06136000  | 2.01644500  | 1.08225700  |
| C | -0.66388900 | 3.87202700  | -0.86190900 |
| H | 0.09382800  | 2.44676000  | -2.27550200 |
| C | -0.52306200 | 3.21598100  | 1.46677200  |
| H | 0.32337300  | 1.29573400  | 1.85191600  |
| C | -0.92123300 | 4.17243400  | 0.49941900  |
| H | -0.92963900 | 4.57559200  | -1.64030300 |
| H | -0.68707300 | 3.39940800  | 2.52070000  |
| N | 7.10826200  | 0.18905500  | 0.31789900  |
| N | -1.37632200 | -4.54945600 | 2.33776600  |

|   |             |             |             |
|---|-------------|-------------|-------------|
| N | -1.55438100 | 5.34209000  | 0.87229800  |
| C | -2.81515800 | -4.53059200 | 2.57814200  |
| H | -3.10835300 | -5.46245900 | 3.06207400  |
| H | -3.08927400 | -3.71026200 | 3.24961900  |
| H | -3.38985300 | -4.42124500 | 1.64775300  |
| C | -0.71754500 | -5.84752400 | 2.27580400  |
| H | -0.57647200 | -6.19709800 | 1.24207600  |
| H | 0.26344600  | -5.81530400 | 2.76126200  |
| H | -1.32217800 | -6.58198200 | 2.80819000  |
| C | 7.59563900  | 0.51034600  | 1.65136200  |
| H | 7.23191800  | -0.21099400 | 2.39250600  |
| H | 8.68460300  | 0.46742200  | 1.65536600  |
| H | 7.29060300  | 1.51518200  | 1.97699300  |
| C | 8.04903100  | 0.17209200  | -0.79277100 |
| H | 7.93263200  | -0.73431900 | -1.39833100 |
| H | 7.92869800  | 1.04112300  | -1.45538400 |
| H | 9.06622300  | 0.18015800  | -0.40163300 |
| C | -1.57576600 | 5.73083300  | 2.27655200  |
| H | -2.07417000 | 6.69512100  | 2.37331200  |
| H | -2.13500600 | 5.00729700  | 2.88046200  |
| H | -0.56502400 | 5.82048800  | 2.69879100  |
| C | -1.86119700 | 6.34819300  | -0.13478200 |
| H | -0.95858200 | 6.76222800  | -0.60741100 |
| H | -2.49745100 | 5.92958400  | -0.92177500 |
| H | -2.40939100 | 7.16614600  | 0.33253800  |
| C | -2.18499700 | -0.38423600 | -2.28531500 |
| O | 0.89499000  | -0.15806600 | -2.47447800 |
| H | -1.39211300 | -0.21555600 | -3.00861500 |
| C | -2.39293900 | -1.80087100 | -1.96074900 |
| C | -3.62802100 | -2.33760400 | -1.56067300 |
| C | -1.28634100 | -2.66364300 | -2.08556000 |
| C | -3.74632800 | -3.69413300 | -1.26621100 |
| H | -4.49034800 | -1.68851500 | -1.47592400 |
| C | -1.40319200 | -4.01379700 | -1.76649800 |
| H | -0.32776700 | -2.24078400 | -2.37077000 |
| C | -2.63292100 | -4.53507400 | -1.35679500 |

|   |             |             |             |
|---|-------------|-------------|-------------|
| H | -4.70849100 | -4.09718100 | -0.96293400 |
| H | -0.53329900 | -4.65995400 | -1.83308700 |
| H | -2.72509900 | -5.58935600 | -1.11166500 |

(6) *Z*-ethyl cinnamate

Total energy: -576.884360941 Hartree

Free energy: = -576.719611 Hartree

|   |             |             |             |
|---|-------------|-------------|-------------|
| C | -0.76721900 | 1.27121500  | 0.00038600  |
| C | -1.60019300 | 0.05563200  | -0.00051200 |
| O | -2.90697400 | 0.41441600  | -0.00013900 |
| O | -1.25130700 | -1.11668000 | -0.00165800 |
| C | -3.86717000 | -0.66861100 | -0.00085000 |
| H | -3.69800400 | -1.29112000 | -0.88545100 |
| H | -1.35953500 | 2.18082700  | 0.00080300  |
| C | 0.57798400  | 1.43600600  | 0.00060600  |
| H | -3.69666800 | -1.29340400 | 0.88182000  |
| C | -5.24865500 | -0.04476900 | 0.00100400  |
| H | -6.00893700 | -0.83129400 | 0.00060700  |
| H | -5.39349600 | 0.57586800  | 0.88983500  |
| H | -5.39493200 | 0.57817000  | -0.88598700 |
| C | 1.75020100  | 0.55666000  | 0.00039300  |
| C | 1.72539500  | -0.85361800 | 0.00123900  |
| C | 3.00912000  | 1.19822100  | -0.00055800 |
| C | 2.91427700  | -1.57969100 | 0.00103800  |
| H | 0.77144300  | -1.36190400 | 0.00197900  |
| C | 4.19421900  | 0.46858000  | -0.00085500 |
| H | 3.05167100  | 2.28418900  | -0.00109900 |
| C | 4.15068300  | -0.92773900 | -0.00004600 |
| H | 2.87519000  | -2.66511400 | 0.00172600  |
| H | 5.14829900  | 0.98679600  | -0.00167700 |
| H | 5.07195300  | -1.50270800 | -0.00025700 |
| H | 0.86742500  | 2.48648900  | 0.00101900  |

(7) arsenic oxide

Total energy: -3405.95221103 Hartree

Free energy: = -3405.523705 Hartree

|    |             |             |             |
|----|-------------|-------------|-------------|
| As | 0.01655100  | -0.00079700 | 1.44597600  |
| C  | -2.31707300 | -3.71727600 | -0.39694700 |
| C  | -1.13600700 | -3.22328700 | -1.00692500 |
| C  | -0.44409300 | -2.15083700 | -0.45733700 |
| C  | -0.88846000 | -1.51897500 | 0.70969800  |
| C  | -2.06131100 | -1.99219300 | 1.31212500  |
| C  | -2.76486400 | -3.06426000 | 0.78104800  |
| H  | -0.75374600 | -3.67851600 | -1.91168200 |
| H  | 0.45996000  | -1.80581700 | -0.95109000 |
| H  | -2.42610800 | -1.51966300 | 2.22040300  |
| H  | -3.66488300 | -3.39477800 | 1.28357000  |
| C  | 1.77405900  | -0.03111600 | 0.68674000  |
| C  | 2.08767700  | 0.66900800  | -0.48372000 |
| C  | 2.77776900  | -0.80565100 | 1.28266100  |
| C  | 3.35655800  | 0.60445600  | -1.04658700 |
| H  | 1.33455000  | 1.28548100  | -0.96637500 |
| C  | 4.05203700  | -0.88107200 | 0.73763100  |
| H  | 2.56351200  | -1.34761600 | 2.20011000  |
| C  | 4.37651600  | -0.18315500 | -0.45486800 |
| H  | 3.55369300  | 1.17158100  | -1.94736100 |
| H  | 4.79724300  | -1.48329800 | 1.24142700  |
| C  | -0.69307000 | 2.78704700  | 1.29556200  |
| C  | -1.60740100 | 1.45178600  | -0.48022300 |
| C  | -1.27415600 | 3.92548200  | 0.75433700  |
| H  | -0.12068400 | 2.87271300  | 2.21555300  |
| C  | -2.19469500 | 2.58013000  | -1.03951900 |
| H  | -1.75428300 | 0.49204200  | -0.96768000 |
| C  | -2.03660800 | 3.85592100  | -0.44075600 |
| H  | -1.13620300 | 4.87087700  | 1.26326800  |
| H  | -2.78038800 | 2.46630600  | -1.94279200 |
| N  | -2.99985100 | -4.79218600 | -0.92270900 |
| N  | 5.63224800  | -0.27003700 | -1.01584700 |
| N  | -2.59915400 | 4.98382300  | -0.99740300 |
| C  | 6.69555300  | -0.96977600 | -0.30914900 |

|   |             |             |             |
|---|-------------|-------------|-------------|
| H | 6.44162600  | -2.02456200 | -0.15163000 |
| H | 7.60667100  | -0.93431900 | -0.90597700 |
| H | 6.90991400  | -0.52135100 | 0.67129900  |
| C | 5.97191800  | 0.55995900  | -2.16244300 |
| H | 5.31712100  | 0.34657900  | -3.01546100 |
| H | 5.89795100  | 1.63343900  | -1.93720100 |
| H | 6.99544600  | 0.34633100  | -2.46963900 |
| C | -2.58781700 | -5.35852500 | -2.19871900 |
| H | -1.56058400 | -5.73936100 | -2.15290300 |
| H | -3.24039800 | -6.19487700 | -2.44810700 |
| H | -2.64223300 | -4.62570300 | -3.01622100 |
| C | -4.27127500 | -5.19959800 | -0.34254000 |
| H | -4.15513700 | -5.48815600 | 0.70879800  |
| H | -5.02746400 | -4.40357700 | -0.39525700 |
| H | -4.65137700 | -6.06584800 | -0.88350200 |
| C | -3.48072100 | 4.86083400  | -2.14910800 |
| H | -3.82124400 | 5.85193400  | -2.44795000 |
| H | -2.95873400 | 4.41586300  | -3.00453600 |
| H | -4.36528100 | 4.24502600  | -1.93295500 |
| C | -2.53031700 | 6.25433800  | -0.29001800 |
| H | -3.02505300 | 6.21268300  | 0.69067100  |
| H | -1.49123500 | 6.56678700  | -0.13283700 |
| H | -3.02086100 | 7.02366100  | -0.88592000 |
| C | -0.84807200 | 1.53218100  | 0.69265400  |
| O | 0.02530500  | 0.01109200  | 3.10561400  |

(8) *E*-reactant complex

Total energy: -3982.85490656 Hartree

Free energy: = -3982.238880 Hartree

|    |             |             |             |
|----|-------------|-------------|-------------|
| C  | 0.84335600  | -0.55115300 | -1.53343700 |
| As | -0.30519900 | 0.08406200  | -0.24543900 |
| C  | -1.31973300 | 4.60974600  | -1.29620100 |
| C  | -2.33620400 | 3.68466700  | -0.94688400 |
| C  | -2.02717100 | 2.36508500  | -0.64580600 |
| C  | -0.70677800 | 1.89924300  | -0.67207900 |

|   |             |             |             |
|---|-------------|-------------|-------------|
| C | 0.30789400  | 2.81039800  | -0.99995100 |
| C | 0.01630700  | 4.13257600  | -1.30588800 |
| H | -3.37292900 | 3.99388700  | -0.91130900 |
| H | -2.83735200 | 1.68979900  | -0.38751400 |
| H | 1.34479200  | 2.49187100  | -1.00271900 |
| H | 0.83494300  | 4.79740400  | -1.55003200 |
| C | 1.19055300  | -1.90925500 | -1.47733700 |
| O | 1.90897500  | -2.32388900 | -2.58338200 |
| O | 0.91695400  | -2.70895800 | -0.55816600 |
| C | 2.26051500  | -3.71526900 | -2.63111400 |
| H | 3.11273500  | -3.76609500 | -3.31479600 |
| H | 2.58577100  | -4.05082300 | -1.64215100 |
| C | 1.09777500  | -4.56436100 | -3.12806900 |
| H | 1.39874400  | -5.61389500 | -3.21575700 |
| H | 0.26496200  | -4.49606500 | -2.42391200 |
| H | 0.75909800  | -4.21833500 | -4.10967000 |
| H | 1.15198300  | 0.10373000  | -2.33464000 |
| C | 0.16725300  | 0.02589400  | 1.61345300  |
| C | 0.21323500  | 1.19630400  | 2.37629200  |
| C | 0.44118400  | -1.19899800 | 2.23854800  |
| C | 0.52341800  | 1.15593700  | 3.72991900  |
| H | 0.01403800  | 2.15655400  | 1.91180900  |
| C | 0.75433700  | -1.25272700 | 3.58980900  |
| H | 0.42737400  | -2.11017200 | 1.65003300  |
| C | 0.79728000  | -0.07429600 | 4.37945600  |
| H | 0.55375600  | 2.08705900  | 4.28114500  |
| H | 0.96906600  | -2.21733400 | 4.03181600  |
| C | -1.95860100 | -0.88143700 | -0.31118900 |
| C | -2.37245800 | -1.47088300 | -1.51071600 |
| C | -2.78939500 | -1.00961900 | 0.80712700  |
| C | -3.57005900 | -2.16566900 | -1.60123400 |
| H | -1.73104400 | -1.39941800 | -2.38523300 |
| C | -3.99553900 | -1.69519400 | 0.73736700  |
| H | -2.49222400 | -0.57729500 | 1.75806400  |
| C | -4.42529600 | -2.29076300 | -0.47576800 |
| H | -3.83827400 | -2.61595400 | -2.54838500 |



|   |             |             |             |
|---|-------------|-------------|-------------|
| H | -4.59920400 | -1.77378300 | 1.63242500  |
| N | -1.61654200 | 5.91524100  | -1.61363600 |
| N | 1.08817300  | -0.12495700 | 5.72601700  |
| N | -5.62599200 | -2.96119300 | -0.55937100 |
| C | 1.50952700  | -1.38150900 | 6.32883400  |
| H | 1.68972600  | -1.22640200 | 7.39240800  |
| H | 0.73289300  | -2.14896400 | 6.23175000  |
| H | 2.43247700  | -1.77259900 | 5.87742400  |
| C | 1.26744300  | 1.11109900  | 6.47387700  |
| H | 2.09352800  | 1.72088200  | 6.08093500  |
| H | 0.35708900  | 1.72153000  | 6.45592000  |
| H | 1.48511200  | 0.87252800  | 7.51474700  |
| C | -2.98448100 | 6.39914600  | -1.49739700 |
| H | -3.36452300 | 6.32487500  | -0.46896100 |
| H | -3.02186200 | 7.44577000  | -1.79821200 |
| H | -3.66345700 | 5.83887200  | -2.15143200 |
| C | -0.54261500 | 6.86491800  | -1.86727000 |
| H | 0.11717400  | 6.98633600  | -0.99699600 |
| H | 0.07332800  | 6.55352100  | -2.71946200 |
| H | -0.97238700 | 7.83746900  | -2.10554400 |
| C | -6.41412400 | -3.18795300 | 0.64336500  |
| H | -7.32539000 | -3.72420800 | 0.37956900  |
| H | -5.87086400 | -3.78195400 | 1.39198800  |
| H | -6.70850400 | -2.24073600 | 1.11035100  |
| C | -5.97377100 | -3.67692800 | -1.77857400 |
| H | -6.02516400 | -2.99761300 | -2.63744800 |
| H | -5.25234000 | -4.47161900 | -2.01588000 |
| H | -6.95597900 | -4.13355800 | -1.65863900 |
| C | 3.09618700  | 0.26017600  | 0.17789900  |
| H | 2.56556200  | -0.52979400 | 0.73644700  |
| O | 2.85433600  | 1.44493400  | 0.38230600  |
| C | 4.13819600  | -0.22594100 | -0.74906600 |
| C | 4.89433400  | 0.67503800  | -1.51410100 |
| C | 4.38785200  | -1.60158000 | -0.84160400 |
| C | 5.88624600  | 0.20091700  | -2.36688600 |
| H | 4.68604200  | 1.73646800  | -1.42366000 |

|   |            |             |             |
|---|------------|-------------|-------------|
| C | 5.38434200 | -2.07623700 | -1.69277900 |
| H | 3.78082000 | -2.29109000 | -0.26152200 |
| C | 6.13230500 | -1.17545900 | -2.45568000 |
| H | 6.47076100 | 0.89559400  | -2.96263900 |
| H | 5.57228900 | -3.14273500 | -1.76804000 |
| H | 6.90751100 | -1.54355100 | -3.12140000 |

(8) *E*-TS1

Total energy: -3982.84538892 Hartree

Free energy: = -3982.226020 Hartree

Imaginary frequency: 319.7  $\text{icm}^{-1}$

|    |             |             |             |
|----|-------------|-------------|-------------|
| C  | 0.57754300  | -1.12517600 | -1.16317200 |
| As | -0.04902900 | 0.25640600  | -0.01550400 |
| C  | 1.05651100  | 4.52082400  | -1.77484300 |
| C  | -0.22449500 | 4.25348300  | -1.22584300 |
| C  | -0.53420300 | 3.00027800  | -0.71748600 |
| C  | 0.40567500  | 1.96052800  | -0.72749000 |
| C  | 1.68107200  | 2.21437900  | -1.25336900 |
| C  | 2.00217800  | 3.46211900  | -1.76746800 |
| H  | -0.98290400 | 5.02512600  | -1.19609900 |
| H  | -1.52815700 | 2.83546400  | -0.31274600 |
| H  | 2.42509200  | 1.42151700  | -1.23952500 |
| H  | 2.99802600  | 3.61492600  | -2.16356000 |
| C  | -0.26568100 | -2.30618500 | -1.09414400 |
| O  | -0.37909700 | -2.94114300 | -2.28868700 |
| O  | -0.76633200 | -2.74594000 | -0.05587600 |
| C  | -1.13461600 | -4.17477600 | -2.29460600 |
| H  | -0.76878800 | -4.71746600 | -3.16915000 |
| H  | -0.89707100 | -4.74667200 | -1.39403800 |
| C  | -2.62660800 | -3.89162800 | -2.39097200 |
| H  | -3.18655000 | -4.83117500 | -2.43813700 |
| H  | -2.96056700 | -3.32684900 | -1.51729200 |
| H  | -2.85034000 | -3.30947500 | -3.28995200 |
| H  | 0.77896900  | -0.72887500 | -2.15481100 |
| C  | 0.58590600  | 0.12159900  | 1.76959700  |

|   |             |             |             |
|---|-------------|-------------|-------------|
| C | 1.24452800  | 1.19526800  | 2.37530400  |
| C | 0.39833800  | -1.06080200 | 2.49695400  |
| C | 1.69911200  | 1.10450000  | 3.68328400  |
| H | 1.41316500  | 2.11303300  | 1.82077200  |
| C | 0.85044200  | -1.16449400 | 3.80536300  |
| H | -0.09977700 | -1.90544500 | 2.03250100  |
| C | 1.51079300  | -0.08092400 | 4.44050500  |
| H | 2.20855100  | 1.95676600  | 4.11399300  |
| H | 0.69334100  | -2.09644700 | 4.33300100  |
| C | -1.95204000 | 0.18988200  | 0.06525400  |
| C | -2.69166500 | -0.04000200 | -1.10256000 |
| C | -2.64754300 | 0.34380000  | 1.26808100  |
| C | -4.07521200 | -0.12317400 | -1.07687800 |
| H | -2.18087900 | -0.18223600 | -2.05124600 |
| C | -4.03382700 | 0.27162800  | 1.31411800  |
| H | -2.10427400 | 0.51141300  | 2.19299500  |
| C | -4.79133000 | 0.03510600  | 0.13902800  |
| H | -4.59903100 | -0.31701300 | -2.00379200 |
| H | -4.52566200 | 0.38828500  | 2.27108600  |
| N | 1.36787700  | 5.75476700  | -2.29309500 |
| N | 1.94758200  | -0.17401300 | 5.74287900  |
| N | -6.16464800 | -0.03608700 | 0.17293300  |
| C | 1.85257900  | -1.44256300 | 6.45116800  |
| H | 2.24237200  | -1.31966000 | 7.46132000  |
| H | 0.81128600  | -1.77574100 | 6.53366500  |
| H | 2.42660500  | -2.23862500 | 5.95662800  |
| C | 2.72898400  | 0.90740300  | 6.32565200  |
| H | 3.66720100  | 1.08285100  | 5.78080600  |
| H | 2.16266200  | 1.84616900  | 6.33794300  |
| H | 2.97632900  | 0.65612700  | 7.35671300  |
| C | 0.39829000  | 6.83896000  | -2.23106100 |
| H | 0.12788100  | 7.08994700  | -1.19646900 |
| H | 0.82359400  | 7.72853900  | -2.69460100 |
| H | -0.52255300 | 6.58627400  | -2.77118400 |
| C | 2.70878800  | 6.01884300  | -2.79561100 |
| H | 3.47092100  | 5.90433800  | -2.01313500 |

|   |             |             |             |
|---|-------------|-------------|-------------|
| H | 2.96752300  | 5.34667600  | -3.62295800 |
| H | 2.75760200  | 7.04146800  | -3.16826900 |
| C | -6.86182100 | 0.00995100  | 1.45058700  |
| H | -7.93554000 | -0.05248000 | 1.27605300  |
| H | -6.57260600 | -0.81922300 | 2.11129700  |
| H | -6.66353100 | 0.95031000  | 1.97811500  |
| C | -6.90258400 | -0.40884700 | -1.02604700 |
| H | -6.73195700 | 0.30786600  | -1.83789000 |
| H | -6.62577100 | -1.40836800 | -1.38944000 |
| H | -7.96942300 | -0.41080900 | -0.80447600 |
| C | 2.35512400  | -1.47967200 | -0.40921900 |
| H | 1.95628500  | -2.00971200 | 0.48278200  |
| O | 2.95180500  | -0.36416800 | -0.24130000 |
| C | 2.89058000  | -2.46879300 | -1.42382200 |
| C | 3.76034400  | -2.03183100 | -2.42829800 |
| C | 2.53561100  | -3.82282900 | -1.37258600 |
| C | 4.25535100  | -2.92750300 | -3.37671700 |
| H | 4.04047600  | -0.98299100 | -2.43731100 |
| C | 3.02961200  | -4.72299300 | -2.31736500 |
| H | 1.86421100  | -4.16716800 | -0.58901500 |
| C | 3.88946100  | -4.27640100 | -3.32564900 |
| H | 4.92982700  | -2.57786200 | -4.15398600 |
| H | 2.74724500  | -5.77111000 | -2.26743400 |
| H | 4.27630900  | -4.97548400 | -4.06174700 |

(9) *E*-INT

Total energy: -3982.85717497 Hartree

Free energy: = -3982.233719 Hartree

|    |             |             |             |
|----|-------------|-------------|-------------|
| C  | -1.10900400 | 0.58091300  | -1.67977100 |
| As | -0.29397900 | -0.09538100 | 0.01389300  |
| C  | -0.04787300 | -4.71362900 | 1.18460800  |
| C  | 1.02036700  | -3.81520900 | 1.43861800  |
| C  | 0.93048000  | -2.47948700 | 1.07486900  |
| C  | -0.22482000 | -1.95861900 | 0.47274300  |
| C  | -1.28844400 | -2.83643400 | 0.23291700  |

|   |             |             |             |
|---|-------------|-------------|-------------|
| C | -1.20939000 | -4.18053600 | 0.57042600  |
| H | 1.92806400  | -4.16090600 | 1.91661200  |
| H | 1.78381100  | -1.83745900 | 1.26761600  |
| H | -2.19555200 | -2.44535400 | -0.21014900 |
| H | -2.05983100 | -4.81634900 | 0.35914600  |
| C | -0.45008900 | 1.79673300  | -2.24958800 |
| O | 0.43970500  | 1.47936900  | -3.20392300 |
| O | -0.68397200 | 2.94236500  | -1.89643800 |
| C | 1.20645400  | 2.57485600  | -3.77673800 |
| H | 1.59010200  | 2.16589700  | -4.71324200 |
| H | 0.52447200  | 3.40012700  | -3.99695300 |
| C | 2.33053800  | 3.00746200  | -2.85013100 |
| H | 2.92959800  | 3.78254300  | -3.33886000 |
| H | 1.92594500  | 3.41364700  | -1.92111800 |
| H | 2.97592500  | 2.16113400  | -2.60764300 |
| H | -1.06872300 | -0.26061500 | -2.37548700 |
| C | -0.46142200 | 1.05151000  | 1.53653000  |
| C | -0.69203100 | 0.49603800  | 2.79791800  |
| C | -0.40819100 | 2.44380700  | 1.41648900  |
| C | -0.84209500 | 1.30135800  | 3.92003700  |
| H | -0.75746500 | -0.58211200 | 2.91308000  |
| C | -0.56256300 | 3.26218300  | 2.53093400  |
| H | -0.25444600 | 2.90887800  | 0.44842900  |
| C | -0.77107800 | 2.71348600  | 3.81974200  |
| H | -1.01971600 | 0.82624400  | 4.87640000  |
| H | -0.52379600 | 4.33488000  | 2.39038600  |
| C | 1.61904700  | 0.13981800  | -0.41979900 |
| C | 2.15782300  | -0.56463500 | -1.50547000 |
| C | 2.49763800  | 0.92461000  | 0.33218100  |
| C | 3.50243200  | -0.48661200 | -1.84163500 |
| H | 1.51710300  | -1.20499000 | -2.10740900 |
| C | 3.85019700  | 1.02321800  | 0.01382600  |
| H | 2.13287600  | 1.47602800  | 1.19303800  |
| C | 4.39096400  | 0.32757000  | -1.09338500 |
| H | 3.86143500  | -1.05865500 | -2.68793000 |
| H | 4.48389700  | 1.64342300  | 0.63525100  |

|   |             |             |             |
|---|-------------|-------------|-------------|
| N | 0.04229200  | -6.04563900 | 1.51668100  |
| N | -0.89284700 | 3.52135800  | 4.93627900  |
| N | 5.72592600  | 0.43949300  | -1.43659300 |
| C | -1.02489600 | 4.96106500  | 4.76450500  |
| H | -1.10946300 | 5.43265700  | 5.74368100  |
| H | -0.14199300 | 5.38184900  | 4.27061600  |
| H | -1.90972600 | 5.23614400  | 4.17147400  |
| C | -1.31101900 | 2.93450700  | 6.20134400  |
| H | -2.30360100 | 2.46383300  | 6.14128300  |
| H | -0.59626800 | 2.17603700  | 6.53948100  |
| H | -1.34748000 | 3.71362000  | 6.96293400  |
| C | 1.20773600  | -6.53982100 | 2.23538800  |
| H | 1.32937200  | -6.05159200 | 3.21223800  |
| H | 1.09900400  | -7.61100300 | 2.40297200  |
| H | 2.12851100  | -6.38288600 | 1.66063300  |
| C | -1.10429300 | -6.92221900 | 1.32624400  |
| H | -1.97421100 | -6.59938300 | 1.91479100  |
| H | -1.40464600 | -6.96440300 | 0.27235700  |
| H | -0.83985700 | -7.93243200 | 1.63756800  |
| C | 6.63948900  | 1.13265600  | -0.54086300 |
| H | 7.63914900  | 1.13092500  | -0.97562000 |
| H | 6.33997500  | 2.17790100  | -0.40358000 |
| H | 6.69466000  | 0.66247800  | 0.45224300  |
| C | 6.28056300  | -0.43554500 | -2.45868800 |
| H | 6.19662100  | -1.50005100 | -2.19412900 |
| H | 5.77906600  | -0.28582000 | -3.42159700 |
| H | 7.33597700  | -0.20076200 | -2.59758900 |
| C | -2.49211300 | 0.71808200  | -1.01301800 |
| H | -2.58435700 | 1.76553400  | -0.66371300 |
| O | -2.40490400 | -0.19143800 | 0.03957400  |
| C | -3.63090200 | 0.46134500  | -1.98702300 |
| C | -4.41203900 | -0.69285500 | -1.89070200 |
| C | -3.89924000 | 1.38182700  | -3.01041900 |
| C | -5.43961200 | -0.93187600 | -2.80775000 |
| H | -4.20806900 | -1.38523000 | -1.08123200 |
| C | -4.92038800 | 1.14342200  | -3.93007000 |

|   |             |             |             |
|---|-------------|-------------|-------------|
| H | -3.30080600 | 2.28747700  | -3.08165100 |
| C | -5.69494400 | -0.01750000 | -3.83180400 |
| H | -6.04287900 | -1.83166800 | -2.72061600 |
| H | -5.11606400 | 1.86297100  | -4.72041600 |
| H | -6.49322200 | -0.20275600 | -4.54486400 |

(10) *E*-TS2

Total energy: -3982.84583890 Hartree

Free energy: = -3982.223714 Hartree

Imaginary frequency: 304.7  $\text{icm}^{-1}$

|    |             |             |             |
|----|-------------|-------------|-------------|
| C  | 0.97177000  | -2.30264300 | -1.51437700 |
| As | -0.21540800 | 0.29587300  | -0.44488700 |
| C  | -3.52176500 | 3.67753000  | 0.02262400  |
| C  | -2.34176100 | 3.68828900  | 0.81123300  |
| C  | -1.37253800 | 2.70764600  | 0.65573700  |
| C  | -1.51343500 | 1.68551300  | -0.29038300 |
| C  | -2.67185800 | 1.66875200  | -1.07687400 |
| C  | -3.65570900 | 2.63797300  | -0.93333000 |
| H  | -2.17967600 | 4.46462400  | 1.54780300  |
| H  | -0.48320100 | 2.75948700  | 1.27803100  |
| H  | -2.79849200 | 0.88994900  | -1.82176600 |
| H  | -4.52925600 | 2.58590900  | -1.57040000 |
| C  | 2.35906000  | -2.01518100 | -1.50338400 |
| O  | 2.98828500  | -2.61497800 | -0.41335300 |
| O  | 3.00549300  | -1.34400000 | -2.31821300 |
| C  | 4.41228300  | -2.45382300 | -0.32529600 |
| H  | 4.75753400  | -3.30429900 | 0.27124100  |
| H  | 4.85116300  | -2.52502900 | -1.32528400 |
| C  | 4.78841400  | -1.13242700 | 0.32800600  |
| H  | 5.87617400  | -1.05296300 | 0.43608700  |
| H  | 4.43150100  | -0.30366300 | -0.28399900 |
| H  | 4.33532300  | -1.04556900 | 1.32026200  |
| H  | 0.56871800  | -2.98331100 | -0.77744300 |
| C  | 1.49951300  | 1.06147600  | -0.20621200 |
| C  | 2.00682300  | 1.31303500  | 1.07562900  |
| C  | 2.24892600  | 1.46700800  | -1.31601800 |

|   |             |             |             |
|---|-------------|-------------|-------------|
| C | 3.21439800  | 1.97223700  | 1.25114900  |
| H | 1.45912600  | 0.98567400  | 1.95436800  |
| C | 3.45787700  | 2.12723600  | -1.15675600 |
| H | 1.88997500  | 1.24481800  | -2.31451300 |
| C | 3.97479200  | 2.40617700  | 0.13485100  |
| H | 3.57250500  | 2.13488700  | 2.25908800  |
| H | 4.01256300  | 2.40685500  | -2.04270900 |
| C | -0.57256600 | -0.84421000 | 1.04264000  |
| C | -1.84074600 | -0.82575100 | 1.63957000  |
| C | 0.42165300  | -1.66389900 | 1.59894100  |
| C | -2.12560800 | -1.62146700 | 2.74035300  |
| H | -2.62202800 | -0.18784400 | 1.23873600  |
| C | 0.15774800  | -2.44400800 | 2.71205800  |
| H | 1.40900200  | -1.70055200 | 1.15228700  |
| C | -1.13070400 | -2.45554200 | 3.31338800  |
| H | -3.12148800 | -1.58292100 | 3.16222300  |
| H | 0.95529700  | -3.05707400 | 3.11160600  |
| N | -4.49557200 | 4.63587700  | 0.18006300  |
| N | 5.17294300  | 3.06599300  | 0.29942400  |
| N | -1.39885800 | -3.23971700 | 4.40658800  |
| C | 6.01813000  | 3.32167400  | -0.85973800 |
| H | 6.91083600  | 3.85881300  | -0.54000100 |
| H | 6.33236700  | 2.39466700  | -1.36051400 |
| H | 5.50008200  | 3.94758800  | -1.59415000 |
| C | 5.77156400  | 3.14786200  | 1.62529600  |
| H | 5.11830200  | 3.68565400  | 2.32101800  |
| H | 5.98182900  | 2.15573500  | 2.05016400  |
| H | 6.70957600  | 3.69892200  | 1.56119600  |
| C | -4.28922800 | 5.73959000  | 1.10659200  |
| H | -3.41195500 | 6.34459100  | 0.83933400  |
| H | -5.16461900 | 6.38819800  | 1.09313700  |
| H | -4.15400800 | 5.38063800  | 2.13421700  |
| C | -5.65598700 | 4.64660000  | -0.69892000 |
| H | -5.37490800 | 4.78101500  | -1.75247100 |
| H | -6.22934800 | 3.71523200  | -0.61653200 |
| H | -6.31322400 | 5.46824800  | -0.41588800 |



|   |             |             |             |
|---|-------------|-------------|-------------|
| C | -0.36232800 | -4.09632200 | 4.96665600  |
| H | -0.76687400 | -4.63658700 | 5.82175300  |
| H | -0.00617700 | -4.83413900 | 4.23633400  |
| H | 0.50111000  | -3.51399200 | 5.31217200  |
| C | -2.73175800 | -3.24552700 | 4.99315900  |
| H | -3.01940600 | -2.24989000 | 5.35425000  |
| H | -3.49061500 | -3.57973400 | 4.27396500  |
| H | -2.74787000 | -3.92827800 | 5.84185800  |
| C | 0.12705700  | -1.75883700 | -2.51433600 |
| H | 0.65227300  | -1.40877800 | -3.40144400 |
| O | -0.49616900 | -0.18880900 | -2.07442100 |
| C | -1.14618100 | -2.48747900 | -2.80224100 |
| C | -2.14414500 | -2.59701000 | -1.82204600 |
| C | -1.34129400 | -3.11397400 | -4.03881400 |
| C | -3.29632000 | -3.34158000 | -2.06372100 |
| H | -2.01274700 | -2.08077600 | -0.87917000 |
| C | -2.49876500 | -3.85758600 | -4.28404500 |
| H | -0.57974200 | -3.02563100 | -4.80935600 |
| C | -3.47879900 | -3.97707800 | -3.29656100 |
| H | -4.05837100 | -3.41910400 | -1.29302700 |
| H | -2.63500800 | -4.33979500 | -5.24796000 |
| H | -4.37930700 | -4.55369900 | -3.48686300 |

(11) *E*-Product complex

Total energy: -3982.87892140 Hartree

Free energy: = -3982.257775 Hartree

|    |             |             |             |
|----|-------------|-------------|-------------|
| C  | 3.12541200  | -1.64280700 | -1.11812900 |
| As | -0.89422000 | 0.37639900  | -0.75310700 |
| C  | -5.44474600 | -0.23718100 | 0.46570100  |
| C  | -4.44676400 | -0.04381500 | 1.45596000  |
| C  | -3.11588500 | 0.12822700  | 1.09988500  |
| C  | -2.71519700 | 0.13464100  | -0.24200500 |
| C  | -3.69172700 | -0.06237900 | -1.22469600 |
| C  | -5.02701600 | -0.24173800 | -0.89068700 |
| H  | -4.70850000 | -0.03768700 | 2.50628000  |
| H  | -2.37783200 | 0.25032000  | 1.88823700  |

|   |             |             |             |
|---|-------------|-------------|-------------|
| H | -3.39241000 | -0.08327000 | -2.26885800 |
| H | -5.74601400 | -0.39024500 | -1.68617800 |
| C | 3.60417900  | -0.25394400 | -1.14934900 |
| O | 4.65324800  | -0.07571300 | -0.30730200 |
| O | 3.14224000  | 0.64901000  | -1.83312400 |
| C | 5.21356800  | 1.25951800  | -0.25111600 |
| H | 6.20676600  | 1.11537600  | 0.17949300  |
| H | 5.31730000  | 1.64326400  | -1.26975500 |
| C | 4.36957400  | 2.19839500  | 0.59891500  |
| H | 4.86969900  | 3.16923400  | 0.67937800  |
| H | 3.38907900  | 2.35260100  | 0.14413300  |
| H | 4.23911800  | 1.79703500  | 1.60803700  |
| H | 3.72960700  | -2.35598000 | -0.56826900 |
| C | -0.40515500 | 2.21590300  | -0.56180700 |
| C | -1.01942100 | 3.07177800  | 0.35828200  |
| C | 0.68508300  | 2.70246300  | -1.29437300 |
| C | -0.57341100 | 4.37464200  | 0.54323700  |
| H | -1.86378800 | 2.72482700  | 0.94817400  |
| C | 1.15215300  | 3.99832700  | -1.11464600 |
| H | 1.19517800  | 2.05054000  | -1.99508100 |
| C | 0.53089300  | 4.87701900  | -0.19123500 |
| H | -1.08080200 | 4.99818300  | 1.26819500  |
| H | 2.00689200  | 4.32289300  | -1.69416500 |
| C | 0.12732000  | -0.51759600 | 0.59571500  |
| C | -0.15209900 | -1.85101100 | 0.92151600  |
| C | 1.25101500  | 0.08434100  | 1.17263700  |
| C | 0.69883900  | -2.58830200 | 1.73028300  |
| H | -1.03091500 | -2.33450800 | 0.50605500  |
| C | 2.11418500  | -0.63816100 | 1.98263500  |
| H | 1.48196200  | 1.12174100  | 0.95693600  |
| C | 1.88699700  | -2.01222500 | 2.24528800  |
| H | 0.46053300  | -3.62632700 | 1.92192000  |
| H | 2.98903800  | -0.14152100 | 2.37910600  |
| N | -6.76484500 | -0.42375800 | 0.80822800  |
| N | 0.98247800  | 6.16945500  | -0.01738500 |
| N | 2.79340300  | -2.76074800 | 2.97137400  |

|   |             |             |             |
|---|-------------|-------------|-------------|
| C | 2.23906400  | 6.57803000  | -0.62993800 |
| H | 2.44274100  | 7.61708100  | -0.37159500 |
| H | 3.08759300  | 5.96552100  | -0.29157200 |
| H | 2.18756700  | 6.51165700  | -1.72250200 |
| C | 0.43063700  | 6.98691800  | 1.05358500  |
| H | -0.64938300 | 7.12305200  | 0.92912000  |
| H | 0.60666900  | 6.55194500  | 2.04838400  |
| H | 0.89214200  | 7.97395800  | 1.02533000  |
| C | -7.17782000 | -0.31254500 | 2.19959800  |
| H | -6.96468100 | 0.68161700  | 2.61648600  |
| H | -8.25100000 | -0.48723200 | 2.27094300  |
| H | -6.67551200 | -1.05849000 | 2.82742100  |
| C | -7.77885800 | -0.52598400 | -0.23125500 |
| H | -7.82794800 | 0.37905800  | -0.85258800 |
| H | -7.58992300 | -1.38092000 | -0.89158600 |
| H | -8.75419400 | -0.67328000 | 0.23173500  |
| C | 4.11517700  | -2.19967800 | 3.22942300  |
| H | 4.72737300  | -2.94402100 | 3.73842500  |
| H | 4.62659000  | -1.89725800 | 2.30385600  |
| H | 4.05038700  | -1.32278300 | 3.88267400  |
| C | 2.65399400  | -4.21206300 | 2.98430200  |
| H | 1.71595900  | -4.51278500 | 3.46258000  |
| H | 2.67376200  | -4.64260600 | 1.97170300  |
| H | 3.47039500  | -4.64560600 | 3.56192300  |
| C | 1.94521100  | -1.95722200 | -1.68483200 |
| H | 1.36218900  | -1.15057700 | -2.12472800 |
| O | -0.66119500 | -0.13354100 | -2.32590500 |
| C | 1.31117600  | -3.27614700 | -1.69156700 |
| C | 1.99911500  | -4.45938100 | -1.36276700 |
| C | -0.06023000 | -3.35533700 | -2.00361000 |
| C | 1.33301300  | -5.68197300 | -1.33204600 |
| H | 3.06106900  | -4.42404700 | -1.13946100 |
| C | -0.72382500 | -4.58088300 | -1.96875400 |
| H | -0.59682700 | -2.43380200 | -2.21679900 |
| C | -0.03213500 | -5.74755000 | -1.63266500 |
| H | 1.87777700  | -6.58662900 | -1.07801000 |

|   |             |             |             |
|---|-------------|-------------|-------------|
| H | -1.78441100 | -4.62569400 | -2.19954600 |
| H | -0.54949300 | -6.70217300 | -1.60708700 |

(11) *E*-ethyl cinnamate

Total energy: -576.891977801 Hartree

Free energy: = -576.726324 Hartree

|   |             |             |             |
|---|-------------|-------------|-------------|
| C | -0.63075800 | -0.30360400 | 0.18335400  |
| C | -2.00466600 | 0.22536800  | 0.26324500  |
| O | -2.90055300 | -0.78690900 | 0.33375300  |
| O | -2.31655800 | 1.40711900  | 0.26971600  |
| C | -4.30051900 | -0.41508500 | 0.39978500  |
| H | -4.79084000 | -1.28418300 | 0.84317100  |
| H | -0.52489100 | -1.38283500 | 0.19092300  |
| C | 0.41686900  | 0.53839400  | 0.10469400  |
| H | -4.40999100 | 0.44087400  | 1.07059200  |
| C | -4.85121800 | -0.10639300 | -0.98378200 |
| H | -5.92296900 | 0.10575100  | -0.91798900 |
| H | -4.34914500 | 0.76709500  | -1.40610700 |
| H | -4.70723800 | -0.95772300 | -1.65523800 |
| H | 0.18521800  | 1.60247000  | 0.10469500  |
| C | 1.83540700  | 0.19395000  | 0.01898700  |
| C | 2.77743500  | 1.23708200  | -0.05788100 |
| C | 2.30575300  | -1.13478800 | 0.00925200  |
| C | 4.14230700  | 0.96669000  | -0.14188000 |
| H | 2.42998300  | 2.26662900  | -0.05117900 |
| C | 3.66788700  | -1.40372100 | -0.07464400 |
| H | 1.60365800  | -1.96010500 | 0.06768000  |
| C | 4.59193000  | -0.35497600 | -0.15063100 |
| H | 4.85277500  | 1.78553700  | -0.20033600 |
| H | 4.01353600  | -2.43298700 | -0.08103200 |
| H | 5.65422800  | -0.56970200 | -0.21593000 |

## 5. References

- [1] S. Omar, R. Abu-Rezig, *J. Phys. Chem. C* **2014**, *118*, 30045–30056.
- [2] P. Wang, C-R. Liu, X-L. Sun, S-S. Chen, J-F. Li, Z. Xie, Y. Tang, *Chem. Commun.* **2012**, *48*, 290–292.
- [3] G. Obi, F. R. V. Heerden, *Synth. Commun.* **2018**, *12*, 1482–1486.
- [4] H. Zhang, X. Huang, *Adv. Synth. Catal.* **2016**, *358*, 3736–3742.
- [5] P. S-W. Leung, Y. Teng, P. H. Toy, *Org. Lett.*, **2010**, *12*, 4996–4999.
- [6] H. Zhang, X. Huang, *Adv. Synth. Catal.* **2016**, *358*, 3736–3742.
- [7] N. K. Jobson, R. Spike, A. R. Crawford, D. Dewar, S. L. Pimlott, A. Sutherland, *Org. Biomol. Chem.* **2008**, *6*, 2369–2376.
- [8] H. Lebel, M. Davi, *Adv. Synth. Catal.* **2008**, *350*, 2352–2358.
- [9] R. Inaba, I. Kawashima, T. Fujii, T. Yumura, H. Imoto, K. Naka, *Chem. Eur. J.* **2020**, *26*, 13400–13407.
- [10] M. Hyotanishi, Y. Isomura, H. Yamamoto, H. Kawasaki, Y. Obora, *Chem. Commun.* **2011**, *47*, 5750–5752.
- [11] J. Ruan, X. Li, O. Saidi, J. Xiao, *J. Am. Chem. Soc.* **2008**, *130*, 2424–2425.
